# Supplementary material for: Proteomic Analysis Reveals sympathetic system and immune-inflammation biomarkers in serum of drug-free obsessive-compulsive disorder
Source: Research Square preprint supplement (doi:10.21203/rs.3.rs-1650133/v1), 2022-05-25
Supplement: Supplementary file 1 [file 0c3189742ea1739765821b86.docx]

**Supplementary Methods**

**Sample collection**

Venous blood samples were collected in EDTA anticoagulant polypropylene tubes from all the participants. Blood samples were centrifuged for 20 min at 10,000 rpm (16211 g) for serum separation. Serum samples were stored at −80 °C prior to the assay. Repeated freeze–thaw cycles were avoided.

**Removal of high abundant proteins**

The most abundant proteins in serum samples were removed by Agilent Human 14 Multiple Affinity Removal System Column following the manufacturer’s protocol (Agilent Technologies). Then these samples were quantified with the BCA Protein Assay Kit (Bio-Rad, USA). Proteins were digested into peptides by filter-aided sample preparation (FASP digestion). The peptide content was estimated by UV light spectral density at 280 nm. Protein normalization was confirmed using 12.5% sodium dodecyl sulfate polyacrylamide gel electrophoresis (SDS-PAGE).

**iTRAQ labeling and SCX-based fractionation**

Protein digestion was performed according to the filter-aided sample preparation procedure described by Wisniewsdki et al(Wisniewski et al., 2009).

After protein digestion, 100 μg peptide mixture of each sample was labeled using iTRAQ reagent according to the manufacturer’s instructions (Applied Biosystems).

iTRAQ labeled peptides were fractionated by Strong Cation Exchange (SCX) chromatography using the AKTA Purifier system (GE Healthcare). The dried peptide mixture was reconstituted and acidified using buffer A (10 mM KH2PO4 in 25% of ACN, pH 3.0) and loaded onto a PolySULFOETHYL 4.6 x 100 mm column (5 µm, 200 Å, PolyLC Inc, Maryland, U.S.A.). The peptides were eluted at a flow rate of 1 ml/min with a gradient of 0%–100% buffer B (500 mM KCl, 10 mM KH2PO4 in 25% of ACN, pH 3.0) for the 58min. The ellution was monitored by absorbance at 214 nm, and fractions were collected for every 1 min. The collected fractions from OCD and Healthy Control group were merged into 3 samples respectively for analysis. Merged samples were separately desalted on C18 Cartridges (Empore™ SPE Cartridges C18 (standard density), bed I.D. 7 mm, volume 3 ml, Sigma) and concentrated by vacuum centrifugation.

**LC-MS/MS analysis**

Each fraction was injected for nanoLC-MS/MS analysis. The peptide mixture was loaded onto a reverse phase trap column (Thermo Scientific Acclaim PepMap100, 100μm*2cm, nanoViper C18) connected to the C18-reversed phase analytical column (Thermo Scientific Easy Column, 10 cm long, 75 μm inner diameter, 3μm resin) in buffer A (0.1% Formic acid) and separated with a linear gradient of buffer B (84% acetonitrile and 0.1% Formic acid) at a flow rate of 300 nl/min controlled by IntelliFlow technology.

LC-MS/MS analysis was performed on a Q Exactive mass spectrometer (Thermo Scientific) that was coupled to Easy nLC (Proxeon Biosystems, now Thermo Fisher Scientific) for 60 min. The mass spectrometer was operated in positive ion mode. MS data was acquired using a data-dependent top10 method dynamically choosing the most abundant precursor ions from the survey scan (300–1800 m/z) for HCD fragmentation. Automatic gain control (AGC) target was set to 3e6, and maximum inject time to 10 ms. Dynamic exclusion duration was 40.0 s. Survey scans were acquired at a resolution of 70,000 at m/z 200 and resolution for HCD spectra was set to 17,500 at m/z 200, and isolation width was 2 m/z. Normalized collision energy was 30 eV and the underfill ratio, which specifies the minimum percentage of the target value likely to be reached at maximum fill time, was defined as 0.1%. The instrument was run with peptide recognition mode enabled.

**Data analysis**

MS raw data was analyzed by Proteome Discoverer 1.4 and its embedded MASCOT engine (Matrix Science, London, UK; version 2.2). The database was Uniprot Human database (Uniprot_Homo_Sapiens_151919_20160405.fasta, 151919 sequences, downloaded on 5th April, 2016). The parameters were set as follows: trypsin as digestion enzyme, an allowance of 2 missed cleavages, oxidized methionine and iTRAQ 4-plex (Y) as the variable modification, fixed modifications that included carbamidomethyl (C) and iTRAQ modification at the N-terminus of the peptide and iTRAQ 4-plex (K). The peptide mass tolerance and fragment mass tolerance was set as 20 ppm and 0.1 Da respectively. A decoy database search strategy was adopted to estimate the false discovery rate (FDR) for peptide identification. High confidence peptides reaching the threshold of FDR≤0.01 were used for protein identifications. Only unique peptides with high confidence and rank 1 were used for protein identifications.

Protein identified according to the peptide matches from all samples. The protein ratios were calculated with the median of only unique peptides. All peptide ratios were normalized by the median protein ratio that should be 1 after the normalization.

**Reference**

Wisniewski, J. R., Zougman, A., Nagaraj, N., & Mann, M., 2009. Universal sample preparation method for proteome analysis. *Nat. Methods*, *6*(5), 359-362. <https://doi.org/10.1038/nmeth.1322>
