# Supplementary material for: Proteomic Analysis Reveals sympathetic system and immune-inflammation biomarkers in serum of drug-free obsessive-compulsive disorder
Source: Research Square preprint supplement (doi:10.21203/rs.3.rs-1650133/v1), 2022-05-25
Supplement: Supplementary file 2 [file 602fb12a965cfb7439d80559.xlsx]

## Sheet: Enrichment
Supplementary Table 4. Results of KEGG enrichment
Map ID	Map Name	#Test	#TestAll	#Ref	#RefAll	%Test	%Ref	Test	Gene ID	Ref	Under/Over	p_value	FDR
ko01200	Carbon metabolism	2	35	12	479	5.7143	2.5052	P14618 P29401	PKM, TKT	P04040 P05062 P04075 P04406 P14618 P00558 O95479 P29401 P37837 P06733 P52209 P60174	over	0.166297	0.387034
ko05205	Proteoglycans in cancer	1	35	15	479	2.8571	3.1315	P08581	MET	P02751 P51884 P60709 P98160 Q9Y251 P01344 P16070 P08253 P26038 P14780 P05556 P08581 P00533 P11362 P05019	under	0.384359	0.387034
ko05144	Malaria	1	35	7	479	2.8571	1.4614	P08581	MET	P49747 P68871 P05362 P35442 P69905 Q07954 P08581	over	0.327725	0.387034
ko04014	Ras signaling pathway	1	35	7	479	2.8571	1.4614	P08581	MET	P07333 P10721 P08581 P00533 P09619 P11362 P05019	over	0.327725	0.387034
ko00710	Carbon fixation in photosynthetic organisms	1	35	6	479	2.8571	1.2526	P29401	TKT	P05062 P04075 P04406 P00558 P29401 P60174	over	0.302663	0.387034
ko04151	PI3K-Akt signaling pathway	1	35	21	479	2.8571	4.3841	P08581	MET	P02751 P49747 P22105 P12111 P12109 P14625 P07333 P07942 P10721 P24821 P35442 P05556 Q99650 P62258 P63104 P02452 P08581 P00533 P09619 P11362 P05019	under	0.339976	0.387034
ko04060	Cytokine-cytokine receptor interaction	2	35	14	479	5.7143	2.9228	P58166 P08581	INHBE, MET	P02775 P55103 P10720 P02776 P07333 P10721 Q9NPH3 Q99650 P08581 P00533 P09619 P40189 P58166 O75888	over	0.197997	0.387034
ko05120	Epithelial cell signaling in Helicobacter pylori infection	1	35	2	479	2.8571	0.4175	P08581	MET	P08581 P00533	over	0.135743	0.387034
ko01230	Biosynthesis of amino acids	2	35	9	479	5.7143	1.8789	P14618 P29401	PKM, TKT	P05062 P04075 P04406 P14618 P00558 P29401 P37837 P06733 P60174	over	0.112903	0.387034
ko01051	Biosynthesis of ansamycins	1	35	1	479	2.8571	0.2088	P29401	TKT	P29401	over	0.0730689	0.387034
ko00030	Pentose phosphate pathway	1	35	6	479	2.8571	1.2526	P29401	TKT	P05062 P04075 O95479 P29401 P37837 P52209	over	0.302663	0.387034
ko04614	Renin-angiotensin system	1	35	5	479	2.8571	1.0438	Q07075	ENPEP	P01019 P15144 P12821 P10619 Q07075	over	0.271709	0.387034
ko04350	TGF-beta signaling pathway	1	35	3	479	2.8571	0.6263	P58166	INHBE	P55103 Q14766 P58166	over	0.189101	0.387034
ko04514	Cell adhesion molecules (CAMs)	1	35	17	479	2.8571	3.5491	P33151	CDH5	Q12860 P33151 P13591 O75144 P05362 P13598 P12830 P14151 Q13740 P15151 Q9BY67 O15394 P05556 Q92859 P10586 P32004 P32942	under	0.374043	0.387034
ko04015	Rap1 signaling pathway	1	35	11	479	2.8571	2.2965	P08581	MET	P60709 P07333 P07737 P12830 P10721 P05556 P08581 P00533 P09619 P11362 P05019	over	0.381506	0.387034
ko04550	Signaling pathways regulating pluripotency of stem cells	1	35	5	479	2.8571	1.0438	P58166	INHBE	P55103 P11362 P40189 P58166 P05019	over	0.271709	0.387034
ko04520	Adherens junction	1	35	7	479	2.8571	1.4614	P08581	MET	P60709 Q12913 P12830 P08581 P00533 P10586 P11362	over	0.327725	0.387034
ko04670	Leukocyte transendothelial migration	1	35	8	479	2.8571	1.6701	P33151	CDH5	P60709 P33151 P05362 P08253 P26038 P14780 P05556 Q9NRY4	over	0.347563	0.387034
ko05206	MicroRNAs in cancer	1	35	7	479	2.8571	1.4614	P08581	MET	P22105 P16070 P24821 P14780 P08581 P00533 P09619	over	0.327725	0.387034
ko05200	Pathways in cancer	1	35	14	479	2.8571	2.9228	P08581	MET	P02751 P14625 P07333 P07942 P12830 P10721 P08253 P14780 P05556 P08581 P00533 P09619 P11362 P05019	under	0.387034	0.387034
ko00565	Ether lipid metabolism	1	35	3	479	2.8571	0.6263	Q13822	ENPP2	Q13093 Q13822 Q96BZ4	over	0.189101	0.387034
ko04610	Complement and coagulation cascades	1	35	55	479	2.8571	11.4823	P01023	A2M	P0C0L5 P0C0L4 P01008 P08603 P00734 P00747 P01042 P10643 P01031 P07357 P00751 P05546 P00736 P09871 P01024 P10909 P05156 P13671 P02748 P06681 P01023 P07358 P12259 P05155 P03952 P48740 P07360 P08697 P05160 P07225 P04003 P02746 P02747 P02671 P11226 P00748 P00740 P00742 P00746 O00187 Q96IY4 P04070 P03951 P08709 P00488 P02745 P20851 P05154 Q9UNN8 P01009 P08174 P05121 P10646 P20023 P00451	under	0.0582978	0.387034
ko05202	Transcriptional misregulation in cancer	1	35	7	479	2.8571	1.4614	P08581	MET	P08571 P17936 P07333 P14780 P05164 P08581 P05019	over	0.327725	0.387034
ko04930	Type II diabetes mellitus	1	35	2	479	2.8571	0.4175	P14618	PKM	Q15848 P14618	over	0.135743	0.387034
ko05100	Bacterial invasion of epithelial cells	1	35	5	479	2.8571	1.0438	P08581	MET	P02751 P60709 P12830 P05556 P08581	over	0.271709	0.387034
ko05218	Melanoma	1	35	6	479	2.8571	1.2526	P08581	MET	P12830 P08581 P00533 P09619 P11362 P05019	over	0.302663	0.387034
ko04144	Endocytosis	1	35	8	479	2.8571	1.6701	P08581	MET	P07333 P10721 P34931 P11717 P02786 P08581 P00533 Q9H7P6	over	0.347563	0.387034
ko00620	Pyruvate metabolism	1	35	3	479	2.8571	0.6263	P14618	PKM	P07195 P00338 P14618	over	0.189101	0.387034
ko05211	Renal cell carcinoma	1	35	1	479	2.8571	0.2088	P08581	MET	P08581	over	0.0730689	0.387034
ko04922	Glucagon signaling pathway	1	35	3	479	2.8571	0.6263	P14618	PKM	P07195 P00338 P14618	over	0.189101	0.387034
ko05230	Central carbon metabolism in cancer	2	35	6	479	5.7143	1.2526	P14618 P08581	PKM	P10721 P14618 P08581 P00533 P09619 P11362	over	0.0584689	0.387034
ko04510	Focal adhesion	1	35	16	479	2.8571	3.3403	P08581	MET	P02751 P49747 P22105 P60709 P12111 P12109 P07942 P24821 P35442 P05556 P02452 P08581 Q9NRY4 P00533 P09619 P05019	under	0.379941	0.387034
ko00010	Glycolysis / Gluconeogenesis	1	35	12	479	2.8571	2.5052	P14618	PKM	P07195 Q9UNW1 P05062 P04075 P04406 P00338 P14618 P00558 P08319 P06733 P60174 P07738	over	0.385952	0.387034
ko04141	Protein processing in endoplasmic reticulum	1	35	10	479	2.8571	2.0877	Q12907	LMAN2	P11021 P14625 Q12907 P07237 Q9Y4L1 P34931 P33908 P27797 P14314 P30101	over	0.373932	0.387034
ko00230	Purine metabolism	1	35	4	479	2.8571	0.8351	P14618	PKM	P14618 Q9NZK5 P00491 O60658	over	0.234125	0.387034
ko00350	Tyrosine metabolism	1	35	4	479	2.8571	0.8351	P09172	DBH	P09172 Q16853 P08319 P16930	over	0.234125	0.387034
ko05203	Viral carcinogenesis	1	35	6	479	2.8571	1.2526	P14618	PKM	P06396 P01024 P14618 P62258 P63104 P40189	over	0.302663	0.387034
ko04360	Axon guidance	1	35	5	479	2.8571	1.0438	P08581	MET	O14786 Q9NPR2 P05556 P08581 P32004	over	0.271709	0.387034
