# Supplementary material for: Proteomic Analysis Reveals sympathetic system and immune-inflammation biomarkers in serum of drug-free obsessive-compulsive disorder
Source: Research Square preprint supplement (doi:10.21203/rs.3.rs-1650133/v1), 2022-05-25
Supplement: Supplementary file 5 [file f497aac1329f97f975a8d64a.xlsx]

## Sheet: Enrichment
Supplementary Table 3.Results of GO enrichmenta analysis
	ONTOLOGY	ID	Description	GeneRatio	BgRatio	pvalue	p.adjust	qvalue	geneID	Count
GO:0042742	BP	GO:0042742	defense response to bacterium	5/32	330/18670	0.000227689	0.0929387	0.0673585	JCHAIN/IGHD/GRN/SSC5D/STAB2	5
GO:0042246	BP	GO:0042246	tissue regeneration	3/32	78/18670	0.000318856	0.0929387	0.0673585	APOD/PKM/IGFBP1	3
GO:0031099	BP	GO:0031099	regeneration	4/32	198/18670	0.000349705	0.0929387	0.0673585	APOD/PKM/GRN/IGFBP1	4
GO:0060263	BP	GO:0060263	regulation of respiratory burst	2/32	17/18670	0.000380896	0.0929387	0.0673585	JCHAIN/GRN	2
GO:0031348	BP	GO:0031348	negative regulation of defense response	4/32	239/18670	0.000710509	0.0992439	0.0719283	APOD/A2M/CDH5/GRN	4
GO:0043567	BP	GO:0043567	regulation of insulin-like growth factor receptor signaling pathway	2/32	26/18670	0.000901507	0.0992439	0.0719283	IGFBP4/IGFBP1	2
GO:0005996	BP	GO:0005996	monosaccharide metabolic process	4/32	287/18670	0.00140077	0.0992439	0.0719283	APOD/PKM/TKT/IGFBP4	4
GO:0090305	BP	GO:0090305	nucleic acid phosphodiester bond hydrolysis	4/32	302/18670	0.00168857	0.0992439	0.0719283	ANG/HELZ2/RNASE4/ENPP2	4
GO:0034443	BP	GO:0034443	negative regulation of lipoprotein oxidation	1/32	1/18670	0.00171398	0.0992439	0.0719283	APOD	1
GO:0060588	BP	GO:0060588	negative regulation of lipoprotein lipid oxidation	1/32	1/18670	0.00171398	0.0992439	0.0719283	APOD	1
GO:1905673	BP	GO:1905673	positive regulation of lysosome organization	1/32	1/18670	0.00171398	0.0992439	0.0719283	GRN	1
GO:0045730	BP	GO:0045730	respiratory burst	2/32	37/18670	0.0018258	0.0992439	0.0719283	JCHAIN/GRN	2
GO:0048009	BP	GO:0048009	insulin-like growth factor receptor signaling pathway	2/32	38/18670	0.00192517	0.0992439	0.0719283	IGFBP4/IGFBP1	2
GO:0090501	BP	GO:0090501	RNA phosphodiester bond hydrolysis	3/32	154/18670	0.0022905	0.0992439	0.0719283	ANG/HELZ2/RNASE4	3
GO:0050728	BP	GO:0050728	negative regulation of inflammatory response	3/32	169/18670	0.00298015	0.0992439	0.0719283	APOD/CDH5/GRN	3
GO:0010634	BP	GO:0010634	positive regulation of epithelial cell migration	3/32	171/18670	0.00308071	0.0992439	0.0719283	GRN/MET/ENPP2	3
GO:0043687	BP	GO:0043687	post-translational protein modification	4/32	361/18670	0.00322301	0.0992439	0.0719283	AMBN/FSTL1/IGFBP4/IGFBP1	4
GO:0031113	BP	GO:0031113	regulation of microtubule polymerization	2/32	50/18670	0.00331197	0.0992439	0.0719283	CDH5/MET	2
GO:0001868	BP	GO:0001868	regulation of complement activation, lectin pathway	1/32	2/18670	0.00342511	0.0992439	0.0719283	A2M	1
GO:0001869	BP	GO:0001869	negative regulation of complement activation, lectin pathway	1/32	2/18670	0.00342511	0.0992439	0.0719283	A2M	1
GO:0005999	BP	GO:0005999	xylulose biosynthetic process	1/32	2/18670	0.00342511	0.0992439	0.0719283	TKT	1
GO:0034439	BP	GO:0034439	lipoprotein lipid oxidation	1/32	2/18670	0.00342511	0.0992439	0.0719283	APOD	1
GO:0034442	BP	GO:0034442	regulation of lipoprotein oxidation	1/32	2/18670	0.00342511	0.0992439	0.0719283	APOD	1
GO:0042160	BP	GO:0042160	lipoprotein modification	1/32	2/18670	0.00342511	0.0992439	0.0719283	APOD	1
GO:0042161	BP	GO:0042161	lipoprotein oxidation	1/32	2/18670	0.00342511	0.0992439	0.0719283	APOD	1
GO:0042309	BP	GO:0042309	homoiothermy	1/32	2/18670	0.00342511	0.0992439	0.0719283	DBH	1
GO:0046166	BP	GO:0046166	glyceraldehyde-3-phosphate biosynthetic process	1/32	2/18670	0.00342511	0.0992439	0.0719283	TKT	1
GO:0060587	BP	GO:0060587	regulation of lipoprotein lipid oxidation	1/32	2/18670	0.00342511	0.0992439	0.0719283	APOD	1
GO:2000098	BP	GO:2000098	negative regulation of smooth muscle cell-matrix adhesion	1/32	2/18670	0.00342511	0.0992439	0.0719283	APOD	1
GO:0031103	BP	GO:0031103	axon regeneration	2/32	51/18670	0.00344348	0.0992439	0.0719283	APOD/GRN	2
GO:0070507	BP	GO:0070507	regulation of microtubule cytoskeleton organization	3/32	186/18670	0.00390191	0.0992439	0.0719283	CEP295/CDH5/MET	3
GO:0045765	BP	GO:0045765	regulation of angiogenesis	4/32	383/18670	0.00398118	0.0992439	0.0719283	PKM/CDH5/GRN/ENPP2	4
GO:0051224	BP	GO:0051224	negative regulation of protein transport	3/32	193/18670	0.0043266	0.0992439	0.0719283	APOD/STXBP5L/SSC5D	3
GO:1904950	BP	GO:1904950	negative regulation of establishment of protein localization	3/32	197/18670	0.00458144	0.0992439	0.0719283	APOD/STXBP5L/SSC5D	3
GO:0001885	BP	GO:0001885	endothelial cell development	2/32	59/18670	0.00458175	0.0992439	0.0719283	CDH5/MET	2
GO:0031102	BP	GO:0031102	neuron projection regeneration	2/32	59/18670	0.00458175	0.0992439	0.0719283	APOD/GRN	2
GO:0045824	BP	GO:0045824	negative regulation of innate immune response	2/32	59/18670	0.00458175	0.0992439	0.0719283	A2M/GRN	2
GO:0032102	BP	GO:0032102	negative regulation of response to external stimulus	4/32	400/18670	0.00464425	0.0992439	0.0719283	APOD/A2M/CDH5/GRN	4
GO:0006006	BP	GO:0006006	glucose metabolic process	3/32	204/18670	0.00504899	0.0992439	0.0719283	APOD/PKM/IGFBP4	3
GO:0045766	BP	GO:0045766	positive regulation of angiogenesis	3/32	204/18670	0.00504899	0.0992439	0.0719283	PKM/CDH5/GRN	3
GO:0006589	BP	GO:0006589	octopamine biosynthetic process	1/32	3/18670	0.00513341	0.0992439	0.0719283	DBH	1
GO:0046333	BP	GO:0046333	octopamine metabolic process	1/32	3/18670	0.00513341	0.0992439	0.0719283	DBH	1
GO:0070494	BP	GO:0070494	regulation of thrombin-activated receptor signaling pathway	1/32	3/18670	0.00513341	0.0992439	0.0719283	MET	1
GO:0070495	BP	GO:0070495	negative regulation of thrombin-activated receptor signaling pathway	1/32	3/18670	0.00513341	0.0992439	0.0719283	MET	1
GO:1903334	BP	GO:1903334	positive regulation of protein folding	1/32	3/18670	0.00513341	0.0992439	0.0719283	GRN	1
GO:2000097	BP	GO:2000097	regulation of smooth muscle cell-matrix adhesion	1/32	3/18670	0.00513341	0.0992439	0.0719283	APOD	1
GO:0034332	BP	GO:0034332	adherens junction organization	2/32	65/18670	0.00553436	0.0992439	0.0719283	ANG/CDH5	2
GO:1901342	BP	GO:1901342	regulation of vasculature development	4/32	422/18670	0.00560841	0.0992439	0.0719283	PKM/CDH5/GRN/ENPP2	4
GO:0048662	BP	GO:0048662	negative regulation of smooth muscle cell proliferation	2/32	67/18670	0.0058704	0.0992439	0.0719283	APOD/ANG	2
GO:0032886	BP	GO:0032886	regulation of microtubule-based process	3/32	218/18670	0.00606827	0.0992439	0.0719283	CEP295/CDH5/MET	3
GO:0050673	BP	GO:0050673	epithelial cell proliferation	4/32	434/18670	0.00618713	0.0992439	0.0719283	ANG/GRN/IGFBP4/PHB2	4
GO:0002532	BP	GO:0002532	production of molecular mediator involved in inflammatory response	2/32	72/18670	0.00675036	0.0992439	0.0719283	APOD/GRN	2
GO:0002265	BP	GO:0002265	astrocyte activation involved in immune response	1/32	4/18670	0.00683886	0.0992439	0.0719283	GRN	1
GO:0002282	BP	GO:0002282	microglial cell activation involved in immune response	1/32	4/18670	0.00683886	0.0992439	0.0719283	GRN	1
GO:0005997	BP	GO:0005997	xylulose metabolic process	1/32	4/18670	0.00683886	0.0992439	0.0719283	TKT	1
GO:0006651	BP	GO:0006651	diacylglycerol biosynthetic process	1/32	4/18670	0.00683886	0.0992439	0.0719283	ANG	1
GO:0019322	BP	GO:0019322	pentose biosynthetic process	1/32	4/18670	0.00683886	0.0992439	0.0719283	TKT	1
GO:0032431	BP	GO:0032431	activation of phospholipase A2 activity	1/32	4/18670	0.00683886	0.0992439	0.0719283	ANG	1
GO:0033600	BP	GO:0033600	negative regulation of mammary gland epithelial cell proliferation	1/32	4/18670	0.00683886	0.0992439	0.0719283	PHB2	1
GO:0042494	BP	GO:0042494	detection of bacterial lipoprotein	1/32	4/18670	0.00683886	0.0992439	0.0719283	SSC5D	1
GO:0050748	BP	GO:0050748	negative regulation of lipoprotein metabolic process	1/32	4/18670	0.00683886	0.0992439	0.0719283	APOD	1
GO:0106016	BP	GO:0106016	positive regulation of inflammatory response to wounding	1/32	4/18670	0.00683886	0.0992439	0.0719283	GRN	1
GO:1903724	BP	GO:1903724	positive regulation of centriole elongation	1/32	4/18670	0.00683886	0.0992439	0.0719283	CEP295	1
GO:1904018	BP	GO:1904018	positive regulation of vasculature development	3/32	230/18670	0.00703347	0.0992439	0.0719283	PKM/CDH5/GRN	3
GO:0046785	BP	GO:0046785	microtubule polymerization	2/32	76/18670	0.00749483	0.0992439	0.0719283	CDH5/MET	2
GO:0048678	BP	GO:0048678	response to axon injury	2/32	77/18670	0.0076865	0.0992439	0.0719283	APOD/GRN	2
GO:0090092	BP	GO:0090092	regulation of transmembrane receptor protein serine/threonine kinase signaling pathway	3/32	241/18670	0.00799426	0.0992439	0.0719283	CDH5/INHBE/FSTL1	3
GO:0031110	BP	GO:0031110	regulation of microtubule polymerization or depolymerization	2/32	79/18670	0.00807647	0.0992439	0.0719283	CDH5/MET	2
GO:0019318	BP	GO:0019318	hexose metabolic process	3/32	244/18670	0.00826911	0.0992439	0.0719283	APOD/PKM/IGFBP4	3
GO:0031334	BP	GO:0031334	positive regulation of protein-containing complex assembly	3/32	244/18670	0.00826911	0.0992439	0.0719283	JCHAIN/CDH5/MET	3
GO:0050708	BP	GO:0050708	regulation of protein secretion	4/32	472/18670	0.00828055	0.0992439	0.0719283	IGHD/STXBP5L/ANG/SSC5D	4
GO:0031536	BP	GO:0031536	positive regulation of exit from mitosis	1/32	5/18670	0.00854148	0.0992439	0.0719283	PHB2	1
GO:0042695	BP	GO:0042695	thelarche	1/32	5/18670	0.00854148	0.0992439	0.0719283	PHB2	1
GO:0060266	BP	GO:0060266	negative regulation of respiratory burst involved in inflammatory response	1/32	5/18670	0.00854148	0.0992439	0.0719283	GRN	1
GO:0060744	BP	GO:0060744	mammary gland branching involved in thelarche	1/32	5/18670	0.00854148	0.0992439	0.0719283	PHB2	1
GO:0060762	BP	GO:0060762	regulation of branching involved in mammary gland duct morphogenesis	1/32	5/18670	0.00854148	0.0992439	0.0719283	PHB2	1
GO:0061302	BP	GO:0061302	smooth muscle cell-matrix adhesion	1/32	5/18670	0.00854148	0.0992439	0.0719283	APOD	1
GO:1901552	BP	GO:1901552	positive regulation of endothelial cell development	1/32	5/18670	0.00854148	0.0992439	0.0719283	CDH5	1
GO:1902564	BP	GO:1902564	negative regulation of neutrophil activation	1/32	5/18670	0.00854148	0.0992439	0.0719283	GRN	1
GO:1903142	BP	GO:1903142	positive regulation of establishment of endothelial barrier	1/32	5/18670	0.00854148	0.0992439	0.0719283	CDH5	1
GO:1903722	BP	GO:1903722	regulation of centriole elongation	1/32	5/18670	0.00854148	0.0992439	0.0719283	CEP295	1
GO:1904959	BP	GO:1904959	regulation of cytochrome-c oxidase activity	1/32	5/18670	0.00854148	0.0992439	0.0719283	PHB2	1
GO:1905098	BP	GO:1905098	negative regulation of guanyl-nucleotide exchange factor activity	1/32	5/18670	0.00854148	0.0992439	0.0719283	MET	1
GO:1905671	BP	GO:1905671	regulation of lysosome organization	1/32	5/18670	0.00854148	0.0992439	0.0719283	GRN	1
GO:0002791	BP	GO:0002791	regulation of peptide secretion	4/32	500/18670	0.0100915	0.103046	0.0746841	IGHD/STXBP5L/ANG/SSC5D	4
GO:0009052	BP	GO:0009052	pentose-phosphate shunt, non-oxidative branch	1/32	6/18670	0.0102413	0.103046	0.0746841	TKT	1
GO:0032430	BP	GO:0032430	positive regulation of phospholipase A2 activity	1/32	6/18670	0.0102413	0.103046	0.0746841	ANG	1
GO:0042866	BP	GO:0042866	pyruvate biosynthetic process	1/32	6/18670	0.0102413	0.103046	0.0746841	PKM	1
GO:0046543	BP	GO:0046543	development of secondary female sexual characteristics	1/32	6/18670	0.0102413	0.103046	0.0746841	PHB2	1
GO:0046601	BP	GO:0046601	positive regulation of centriole replication	1/32	6/18670	0.0102413	0.103046	0.0746841	CEP295	1
GO:0060264	BP	GO:0060264	regulation of respiratory burst involved in inflammatory response	1/32	6/18670	0.0102413	0.103046	0.0746841	GRN	1
GO:0060268	BP	GO:0060268	negative regulation of respiratory burst	1/32	6/18670	0.0102413	0.103046	0.0746841	GRN	1
GO:0061511	BP	GO:0061511	centriole elongation	1/32	6/18670	0.0102413	0.103046	0.0746841	CEP295	1
GO:0071638	BP	GO:0071638	negative regulation of monocyte chemotactic protein-1 production	1/32	6/18670	0.0102413	0.103046	0.0746841	APOD	1
GO:0106014	BP	GO:0106014	regulation of inflammatory response to wounding	1/32	6/18670	0.0102413	0.103046	0.0746841	GRN	1
GO:1904732	BP	GO:1904732	regulation of electron transfer activity	1/32	6/18670	0.0102413	0.103046	0.0746841	PHB2	1
GO:2000405	BP	GO:2000405	negative regulation of T cell migration	1/32	6/18670	0.0102413	0.103046	0.0746841	APOD	1
GO:0030510	BP	GO:0030510	regulation of BMP signaling pathway	2/32	91/18670	0.0105984	0.105552	0.0765	CDH5/FSTL1	2
GO:0002832	BP	GO:0002832	negative regulation of response to biotic stimulus	2/32	95/18670	0.011507	0.108895	0.0789228	A2M/GRN	2
GO:0002536	BP	GO:0002536	respiratory burst involved in inflammatory response	1/32	7/18670	0.0119382	0.108895	0.0789228	GRN	1
GO:0010890	BP	GO:0010890	positive regulation of sequestering of triglyceride	1/32	7/18670	0.0119382	0.108895	0.0789228	APOC4	1
GO:0032493	BP	GO:0032493	response to bacterial lipoprotein	1/32	7/18670	0.0119382	0.108895	0.0789228	SSC5D	1
GO:0042421	BP	GO:0042421	norepinephrine biosynthetic process	1/32	7/18670	0.0119382	0.108895	0.0789228	DBH	1
GO:1901299	BP	GO:1901299	negative regulation of hydrogen peroxide-mediated programmed cell death	1/32	7/18670	0.0119382	0.108895	0.0789228	MET	1
GO:1903979	BP	GO:1903979	negative regulation of microglial cell activation	1/32	7/18670	0.0119382	0.108895	0.0789228	GRN	1
GO:1905097	BP	GO:1905097	regulation of guanyl-nucleotide exchange factor activity	1/32	7/18670	0.0119382	0.108895	0.0789228	MET	1
GO:2000394	BP	GO:2000394	positive regulation of lamellipodium morphogenesis	1/32	7/18670	0.0119382	0.108895	0.0789228	ENPP2	1
GO:0051258	BP	GO:0051258	protein polymerization	3/32	283/18670	0.0123551	0.109376	0.0792716	ANG/CDH5/MET	3
GO:0050830	BP	GO:0050830	defense response to Gram-positive bacterium	2/32	101/18670	0.012932	0.109376	0.0792716	SSC5D/STAB2	2
GO:0010632	BP	GO:0010632	regulation of epithelial cell migration	3/32	291/18670	0.0133133	0.109376	0.0792716	GRN/MET/ENPP2	3
GO:0001955	BP	GO:0001955	blood vessel maturation	1/32	8/18670	0.0136324	0.109376	0.0792716	CDH5	1
GO:0007042	BP	GO:0007042	lysosomal lumen acidification	1/32	8/18670	0.0136324	0.109376	0.0792716	GRN	1
GO:0010825	BP	GO:0010825	positive regulation of centrosome duplication	1/32	8/18670	0.0136324	0.109376	0.0792716	CEP295	1
GO:0019682	BP	GO:0019682	glyceraldehyde-3-phosphate metabolic process	1/32	8/18670	0.0136324	0.109376	0.0792716	TKT	1
GO:0034638	BP	GO:0034638	phosphatidylcholine catabolic process	1/32	8/18670	0.0136324	0.109376	0.0792716	ENPP2	1
GO:0042420	BP	GO:0042420	dopamine catabolic process	1/32	8/18670	0.0136324	0.109376	0.0792716	DBH	1
GO:0042439	BP	GO:0042439	ethanolamine-containing compound metabolic process	1/32	8/18670	0.0136324	0.109376	0.0792716	DBH	1
GO:0045136	BP	GO:0045136	development of secondary sexual characteristics	1/32	8/18670	0.0136324	0.109376	0.0792716	PHB2	1
GO:0045916	BP	GO:0045916	negative regulation of complement activation	1/32	8/18670	0.0136324	0.109376	0.0792716	A2M	1
GO:1905247	BP	GO:1905247	positive regulation of aspartic-type peptidase activity	1/32	8/18670	0.0136324	0.109376	0.0792716	GRN	1
GO:2000483	BP	GO:2000483	negative regulation of interleukin-8 secretion	1/32	8/18670	0.0136324	0.109376	0.0792716	SSC5D	1
GO:0090100	BP	GO:0090100	positive regulation of transmembrane receptor protein serine/threonine kinase signaling pathway	2/32	104/18670	0.013672	0.109376	0.0792716	CDH5/INHBE	2
GO:2001023	BP	GO:2001023	regulation of response to drug	2/32	106/18670	0.0141754	0.112481	0.0815221	SYT13/MET	2
GO:0014012	BP	GO:0014012	peripheral nervous system axon regeneration	1/32	9/18670	0.0153237	0.117764	0.0853506	APOD	1
GO:0019614	BP	GO:0019614	catechol-containing compound catabolic process	1/32	9/18670	0.0153237	0.117764	0.0853506	DBH	1
GO:0042424	BP	GO:0042424	catecholamine catabolic process	1/32	9/18670	0.0153237	0.117764	0.0853506	DBH	1
GO:0060267	BP	GO:0060267	positive regulation of respiratory burst	1/32	9/18670	0.0153237	0.117764	0.0853506	JCHAIN	1
GO:0031109	BP	GO:0031109	microtubule polymerization or depolymerization	2/32	112/18670	0.0157332	0.119965	0.0869465	CDH5/MET	2
GO:0045446	BP	GO:0045446	endothelial cell differentiation	2/32	114/18670	0.0162681	0.122339	0.0886664	CDH5/MET	2
GO:0034447	BP	GO:0034447	very-low-density lipoprotein particle clearance	1/32	10/18670	0.0170123	0.122339	0.0886664	APOC4	1
GO:0048149	BP	GO:0048149	behavioral response to ethanol	1/32	10/18670	0.0170123	0.122339	0.0886664	DBH	1
GO:1900426	BP	GO:1900426	positive regulation of defense response to bacterium	1/32	10/18670	0.0170123	0.122339	0.0886664	GRN	1
GO:1903332	BP	GO:1903332	regulation of protein folding	1/32	10/18670	0.0170123	0.122339	0.0886664	GRN	1
GO:0002698	BP	GO:0002698	negative regulation of immune effector process	2/32	120/18670	0.0179193	0.122339	0.0886664	A2M/GRN	2
GO:0009629	BP	GO:0009629	response to gravity	1/32	11/18670	0.018698	0.122339	0.0886664	PKM	1
GO:0014870	BP	GO:0014870	response to muscle inactivity	1/32	11/18670	0.018698	0.122339	0.0886664	PKM	1
GO:0032490	BP	GO:0032490	detection of molecule of bacterial origin	1/32	11/18670	0.018698	0.122339	0.0886664	SSC5D	1
GO:0034379	BP	GO:0034379	very-low-density lipoprotein particle assembly	1/32	11/18670	0.018698	0.122339	0.0886664	APOC4	1
GO:0046607	BP	GO:0046607	positive regulation of centrosome cycle	1/32	11/18670	0.018698	0.122339	0.0886664	CEP295	1
GO:0048680	BP	GO:0048680	positive regulation of axon regeneration	1/32	11/18670	0.018698	0.122339	0.0886664	GRN	1
GO:1902563	BP	GO:1902563	regulation of neutrophil activation	1/32	11/18670	0.018698	0.122339	0.0886664	GRN	1
GO:1905245	BP	GO:1905245	regulation of aspartic-type peptidase activity	1/32	11/18670	0.018698	0.122339	0.0886664	GRN	1
GO:2000392	BP	GO:2000392	regulation of lamellipodium morphogenesis	1/32	11/18670	0.018698	0.122339	0.0886664	ENPP2	1
GO:0010595	BP	GO:0010595	positive regulation of endothelial cell migration	2/32	128/18670	0.0202267	0.122339	0.0886664	GRN/MET	2
GO:0002002	BP	GO:0002002	regulation of angiotensin levels in blood	1/32	12/18670	0.0203809	0.122339	0.0886664	ENPEP	1
GO:0002003	BP	GO:0002003	angiotensin maturation	1/32	12/18670	0.0203809	0.122339	0.0886664	ENPEP	1
GO:0002921	BP	GO:0002921	negative regulation of humoral immune response	1/32	12/18670	0.0203809	0.122339	0.0886664	A2M	1
GO:0010889	BP	GO:0010889	regulation of sequestering of triglyceride	1/32	12/18670	0.0203809	0.122339	0.0886664	APOC4	1
GO:0016045	BP	GO:0016045	detection of bacterium	1/32	12/18670	0.0203809	0.122339	0.0886664	SSC5D	1
GO:0019336	BP	GO:0019336	phenol-containing compound catabolic process	1/32	12/18670	0.0203809	0.122339	0.0886664	DBH	1
GO:0032429	BP	GO:0032429	regulation of phospholipase A2 activity	1/32	12/18670	0.0203809	0.122339	0.0886664	ANG	1
GO:0035751	BP	GO:0035751	regulation of lysosomal lumen pH	1/32	12/18670	0.0203809	0.122339	0.0886664	GRN	1
GO:0042308	BP	GO:0042308	negative regulation of protein import into nucleus	1/32	12/18670	0.0203809	0.122339	0.0886664	APOD	1
GO:0070493	BP	GO:0070493	thrombin-activated receptor signaling pathway	1/32	12/18670	0.0203809	0.122339	0.0886664	MET	1
GO:0070572	BP	GO:0070572	positive regulation of neuron projection regeneration	1/32	12/18670	0.0203809	0.122339	0.0886664	GRN	1
GO:1901298	BP	GO:1901298	regulation of hydrogen peroxide-mediated programmed cell death	1/32	12/18670	0.0203809	0.122339	0.0886664	MET	1
GO:1904424	BP	GO:1904424	regulation of GTP binding	1/32	12/18670	0.0203809	0.122339	0.0886664	MET	1
GO:1904590	BP	GO:1904590	negative regulation of protein import	1/32	12/18670	0.0203809	0.122339	0.0886664	APOD	1
GO:0003158	BP	GO:0003158	endothelium development	2/32	132/18670	0.0214248	0.122339	0.0886664	CDH5/MET	2
GO:0007178	BP	GO:0007178	transmembrane receptor protein serine/threonine kinase signaling pathway	3/32	349/18670	0.0215199	0.122339	0.0886664	CDH5/INHBE/FSTL1	3
GO:0010631	BP	GO:0010631	epithelial cell migration	3/32	352/18670	0.0220053	0.122339	0.0886664	GRN/MET/ENPP2	3
GO:0001867	BP	GO:0001867	complement activation, lectin pathway	1/32	13/18670	0.022061	0.122339	0.0886664	A2M	1
GO:0001886	BP	GO:0001886	endothelial cell morphogenesis	1/32	13/18670	0.022061	0.122339	0.0886664	MET	1
GO:0002281	BP	GO:0002281	macrophage activation involved in immune response	1/32	13/18670	0.022061	0.122339	0.0886664	GRN	1
GO:0002679	BP	GO:0002679	respiratory burst involved in defense response	1/32	13/18670	0.022061	0.122339	0.0886664	GRN	1
GO:0010642	BP	GO:0010642	negative regulation of platelet-derived growth factor receptor signaling pathway	1/32	13/18670	0.022061	0.122339	0.0886664	APOD	1
GO:0031115	BP	GO:0031115	negative regulation of microtubule polymerization	1/32	13/18670	0.022061	0.122339	0.0886664	CDH5	1
GO:0033147	BP	GO:0033147	negative regulation of intracellular estrogen receptor signaling pathway	1/32	13/18670	0.022061	0.122339	0.0886664	PHB2	1
GO:0042415	BP	GO:0042415	norepinephrine metabolic process	1/32	13/18670	0.022061	0.122339	0.0886664	DBH	1
GO:0042711	BP	GO:0042711	maternal behavior	1/32	13/18670	0.022061	0.122339	0.0886664	DBH	1
GO:0043568	BP	GO:0043568	positive regulation of insulin-like growth factor receptor signaling pathway	1/32	13/18670	0.022061	0.122339	0.0886664	IGFBP4	1
GO:0050746	BP	GO:0050746	regulation of lipoprotein metabolic process	1/32	13/18670	0.022061	0.122339	0.0886664	APOD	1
GO:0060746	BP	GO:0060746	parental behavior	1/32	13/18670	0.022061	0.122339	0.0886664	DBH	1
GO:0090594	BP	GO:0090594	inflammatory response to wounding	1/32	13/18670	0.022061	0.122339	0.0886664	GRN	1
GO:1901550	BP	GO:1901550	regulation of endothelial cell development	1/32	13/18670	0.022061	0.122339	0.0886664	CDH5	1
GO:1903140	BP	GO:1903140	regulation of establishment of endothelial barrier	1/32	13/18670	0.022061	0.122339	0.0886664	CDH5	1
GO:0001889	BP	GO:0001889	liver development	2/32	135/18670	0.0223425	0.123199	0.0892904	PKM/MET	2
GO:0090132	BP	GO:0090132	epithelium migration	3/32	355/18670	0.0224967	0.123353	0.0894013	GRN/MET/ENPP2	3
GO:0006959	BP	GO:0006959	humoral immune response	3/32	356/18670	0.0226618	0.123564	0.0895544	JCHAIN/A2M/IGHD	3
GO:0001666	BP	GO:0001666	response to hypoxia	3/32	359/18670	0.0231612	0.123897	0.0897956	PKM/ANG/PHB2	3
GO:0061008	BP	GO:0061008	hepaticobiliary system development	2/32	138/18670	0.0232764	0.123897	0.0897956	PKM/MET	2
GO:0090130	BP	GO:0090130	tissue migration	3/32	361/18670	0.0234975	0.123897	0.0897956	GRN/MET/ENPP2	3
GO:0010421	BP	GO:0010421	hydrogen peroxide-mediated programmed cell death	1/32	14/18670	0.0237384	0.123897	0.0897956	MET	1
GO:0014854	BP	GO:0014854	response to inactivity	1/32	14/18670	0.0237384	0.123897	0.0897956	PKM	1
GO:0044090	BP	GO:0044090	positive regulation of vacuole organization	1/32	14/18670	0.0237384	0.123897	0.0897956	GRN	1
GO:0097468	BP	GO:0097468	programmed cell death in response to reactive oxygen species	1/32	14/18670	0.0237384	0.123897	0.0897956	MET	1
GO:0098543	BP	GO:0098543	detection of other organism	1/32	14/18670	0.0237384	0.123897	0.0897956	SSC5D	1
GO:0050709	BP	GO:0050709	negative regulation of protein secretion	2/32	141/18670	0.0242262	0.124638	0.0903332	STXBP5L/SSC5D	2
GO:1902904	BP	GO:1902904	negative regulation of supramolecular fiber organization	2/32	142/18670	0.0245463	0.124638	0.0903332	CDH5/MET	2
GO:0006606	BP	GO:0006606	protein import into nucleus	2/32	143/18670	0.0248681	0.124638	0.0903332	APOD/PHB2	2
GO:0006909	BP	GO:0006909	phagocytosis	3/32	369/18670	0.0248696	0.124638	0.0903332	IGHD/MET/LMAN2	3
GO:0036293	BP	GO:0036293	response to decreased oxygen levels	3/32	370/18670	0.0250441	0.124638	0.0903332	PKM/ANG/PHB2	3
GO:0006098	BP	GO:0006098	pentose-phosphate shunt	1/32	15/18670	0.0254129	0.124638	0.0903332	TKT	1
GO:0019321	BP	GO:0019321	pentose metabolic process	1/32	15/18670	0.0254129	0.124638	0.0903332	TKT	1
GO:0030730	BP	GO:0030730	sequestering of triglyceride	1/32	15/18670	0.0254129	0.124638	0.0903332	APOC4	1
GO:0035635	BP	GO:0035635	entry of bacterium into host cell	1/32	15/18670	0.0254129	0.124638	0.0903332	MET	1
GO:0046184	BP	GO:0046184	aldehyde biosynthetic process	1/32	15/18670	0.0254129	0.124638	0.0903332	TKT	1
GO:2000402	BP	GO:2000402	negative regulation of lymphocyte migration	1/32	15/18670	0.0254129	0.124638	0.0903332	APOD	1
GO:2001028	BP	GO:2001028	positive regulation of endothelial cell chemotaxis	1/32	15/18670	0.0254129	0.124638	0.0903332	MET	1
GO:0050727	BP	GO:0050727	regulation of inflammatory response	3/32	374/18670	0.0257489	0.125654	0.0910696	APOD/CDH5/GRN	3
GO:0050678	BP	GO:0050678	regulation of epithelial cell proliferation	3/32	378/18670	0.0264644	0.127426	0.0923533	ANG/GRN/PHB2	3
GO:0002792	BP	GO:0002792	negative regulation of peptide secretion	2/32	148/18670	0.0265035	0.127426	0.0923533	STXBP5L/SSC5D	2
GO:0051494	BP	GO:0051494	negative regulation of cytoskeleton organization	2/32	148/18670	0.0265035	0.127426	0.0923533	CDH5/MET	2
GO:0030214	BP	GO:0030214	hyaluronan catabolic process	1/32	16/18670	0.0270847	0.127488	0.0923987	STAB2	1
GO:0043031	BP	GO:0043031	negative regulation of macrophage activation	1/32	16/18670	0.0270847	0.127488	0.0923987	GRN	1
GO:0048012	BP	GO:0048012	hepatocyte growth factor receptor signaling pathway	1/32	16/18670	0.0270847	0.127488	0.0923987	MET	1
GO:0048754	BP	GO:0048754	branching morphogenesis of an epithelial tube	2/32	150/18670	0.0271696	0.127488	0.0923987	MET/PHB2	2
GO:0050777	BP	GO:0050777	negative regulation of immune response	2/32	150/18670	0.0271696	0.127488	0.0923987	A2M/GRN	2
GO:0006740	BP	GO:0006740	NADPH regeneration	1/32	17/18670	0.0287537	0.133003	0.0963955	TKT	1
GO:0033599	BP	GO:0033599	regulation of mammary gland epithelial cell proliferation	1/32	17/18670	0.0287537	0.133003	0.0963955	PHB2	1
GO:0072673	BP	GO:0072673	lamellipodium morphogenesis	1/32	17/18670	0.0287537	0.133003	0.0963955	ENPP2	1
GO:0070482	BP	GO:0070482	response to oxygen levels	3/32	394/18670	0.0294336	0.134343	0.0973668	PKM/ANG/PHB2	3
GO:0030509	BP	GO:0030509	BMP signaling pathway	2/32	157/18670	0.0295542	0.134343	0.0973668	CDH5/FSTL1	2
GO:0007597	BP	GO:0007597	blood coagulation, intrinsic pathway	1/32	18/18670	0.0304199	0.134343	0.0973668	A2M	1
GO:0051895	BP	GO:0051895	negative regulation of focal adhesion assembly	1/32	18/18670	0.0304199	0.134343	0.0973668	APOD	1
GO:0060749	BP	GO:0060749	mammary gland alveolus development	1/32	18/18670	0.0304199	0.134343	0.0973668	PHB2	1
GO:0061377	BP	GO:0061377	mammary gland lobule development	1/32	18/18670	0.0304199	0.134343	0.0973668	PHB2	1
GO:0071605	BP	GO:0071605	monocyte chemotactic protein-1 production	1/32	18/18670	0.0304199	0.134343	0.0973668	APOD	1
GO:0071637	BP	GO:0071637	regulation of monocyte chemotactic protein-1 production	1/32	18/18670	0.0304199	0.134343	0.0973668	APOD	1
GO:0150079	BP	GO:0150079	negative regulation of neuroinflammatory response	1/32	18/18670	0.0304199	0.134343	0.0973668	GRN	1
GO:0150118	BP	GO:0150118	negative regulation of cell-substrate junction organization	1/32	18/18670	0.0304199	0.134343	0.0973668	APOD	1
GO:1903305	BP	GO:1903305	regulation of regulated secretory pathway	2/32	160/18670	0.0306011	0.134535	0.0975057	SYT13/STXBP5L	2
GO:0051170	BP	GO:0051170	import into nucleus	2/32	163/18670	0.0316627	0.138555	0.100419	APOD/PHB2	2
GO:0001991	BP	GO:0001991	regulation of systemic arterial blood pressure by circulatory renin-angiotensin	1/32	19/18670	0.0320833	0.138555	0.100419	ENPEP	1
GO:0007096	BP	GO:0007096	regulation of exit from mitosis	1/32	19/18670	0.0320833	0.138555	0.100419	PHB2	1
GO:0098581	BP	GO:0098581	detection of external biotic stimulus	1/32	19/18670	0.0320833	0.138555	0.100419	SSC5D	1
GO:0007156	BP	GO:0007156	homophilic cell adhesion via plasma membrane adhesion molecules	2/32	168/18670	0.0334642	0.142885	0.103558	CDH5/PCDH18	2
GO:0046823	BP	GO:0046823	negative regulation of nucleocytoplasmic transport	1/32	20/18670	0.033744	0.142885	0.103558	APOD	1
GO:1900424	BP	GO:1900424	regulation of defense response to bacterium	1/32	20/18670	0.033744	0.142885	0.103558	GRN	1
GO:1903978	BP	GO:1903978	regulation of microglial cell activation	1/32	20/18670	0.033744	0.142885	0.103558	GRN	1
GO:0048660	BP	GO:0048660	regulation of smooth muscle cell proliferation	2/32	169/18670	0.0338293	0.142885	0.103558	APOD/ANG	2
GO:0071772	BP	GO:0071772	response to BMP	2/32	170/18670	0.0341959	0.142885	0.103558	CDH5/FSTL1	2
GO:0071773	BP	GO:0071773	cellular response to BMP stimulus	2/32	170/18670	0.0341959	0.142885	0.103558	CDH5/FSTL1	2
GO:0048659	BP	GO:0048659	smooth muscle cell proliferation	2/32	171/18670	0.0345642	0.142885	0.103558	APOD/ANG	2
GO:0007035	BP	GO:0007035	vacuolar acidification	1/32	21/18670	0.0354019	0.142885	0.103558	GRN	1
GO:0009713	BP	GO:0009713	catechol-containing compound biosynthetic process	1/32	21/18670	0.0354019	0.142885	0.103558	DBH	1
GO:0032682	BP	GO:0032682	negative regulation of chemokine production	1/32	21/18670	0.0354019	0.142885	0.103558	APOD	1
GO:0036499	BP	GO:0036499	PERK-mediated unfolded protein response	1/32	21/18670	0.0354019	0.142885	0.103558	IGFBP1	1
GO:0042423	BP	GO:0042423	catecholamine biosynthetic process	1/32	21/18670	0.0354019	0.142885	0.103558	DBH	1
GO:1900016	BP	GO:1900016	negative regulation of cytokine production involved in inflammatory response	1/32	21/18670	0.0354019	0.142885	0.103558	APOD	1
GO:2000114	BP	GO:2000114	regulation of establishment of cell polarity	1/32	21/18670	0.0354019	0.142885	0.103558	CDH5	1
GO:0003018	BP	GO:0003018	vascular process in circulatory system	2/32	175/18670	0.0360527	0.142885	0.103558	DBH/CDH5	2
GO:0006956	BP	GO:0006956	complement activation	2/32	175/18670	0.0360527	0.142885	0.103558	A2M/IGHD	2
GO:0043254	BP	GO:0043254	regulation of protein-containing complex assembly	3/32	429/18670	0.0365241	0.142885	0.103558	JCHAIN/CDH5/MET	3
GO:0003094	BP	GO:0003094	glomerular filtration	1/32	22/18670	0.0370571	0.142885	0.103558	JCHAIN	1
GO:0006379	BP	GO:0006379	mRNA cleavage	1/32	22/18670	0.0370571	0.142885	0.103558	RNASE4	1
GO:0010155	BP	GO:0010155	regulation of proton transport	1/32	22/18670	0.0370571	0.142885	0.103558	PHB2	1
GO:0010884	BP	GO:0010884	positive regulation of lipid storage	1/32	22/18670	0.0370571	0.142885	0.103558	APOC4	1
GO:0035024	BP	GO:0035024	negative regulation of Rho protein signal transduction	1/32	22/18670	0.0370571	0.142885	0.103558	MET	1
GO:0044342	BP	GO:0044342	type B pancreatic cell proliferation	1/32	22/18670	0.0370571	0.142885	0.103558	IGFBP4	1
GO:0046339	BP	GO:0046339	diacylglycerol metabolic process	1/32	22/18670	0.0370571	0.142885	0.103558	ANG	1
GO:0046599	BP	GO:0046599	regulation of centriole replication	1/32	22/18670	0.0370571	0.142885	0.103558	CEP295	1
GO:0050821	BP	GO:0050821	protein stabilization	2/32	178/18670	0.0371853	0.142885	0.103558	GRN/PHB2	2
GO:0090090	BP	GO:0090090	negative regulation of canonical Wnt signaling pathway	2/32	178/18670	0.0371853	0.142885	0.103558	IGFBP4/IGFBP1	2
GO:0048732	BP	GO:0048732	gland development	3/32	434/18670	0.0376033	0.143679	0.104133	PKM/MET/PHB2	3
GO:0002683	BP	GO:0002683	negative regulation of immune system process	3/32	435/18670	0.0378211	0.143679	0.104133	APOD/A2M/GRN	3
GO:0032717	BP	GO:0032717	negative regulation of interleukin-8 production	1/32	23/18670	0.0387095	0.143679	0.104133	SSC5D	1
GO:0042401	BP	GO:0042401	cellular biogenic amine biosynthetic process	1/32	23/18670	0.0387095	0.143679	0.104133	DBH	1
GO:0061436	BP	GO:0061436	establishment of skin barrier	1/32	23/18670	0.0387095	0.143679	0.104133	MET	1
GO:0097205	BP	GO:0097205	renal filtration	1/32	23/18670	0.0387095	0.143679	0.104133	JCHAIN	1
GO:1901032	BP	GO:1901032	negative regulation of response to reactive oxygen species	1/32	23/18670	0.0387095	0.143679	0.104133	MET	1
GO:1903206	BP	GO:1903206	negative regulation of hydrogen peroxide-induced cell death	1/32	23/18670	0.0387095	0.143679	0.104133	MET	1
GO:0061138	BP	GO:0061138	morphogenesis of a branching epithelium	2/32	182/18670	0.0387167	0.143679	0.104133	MET/PHB2	2
GO:0045216	BP	GO:0045216	cell-cell junction organization	2/32	185/18670	0.039881	0.145891	0.105736	ANG/CDH5	2
GO:0009309	BP	GO:0009309	amine biosynthetic process	1/32	24/18670	0.0403592	0.145891	0.105736	DBH	1
GO:0010640	BP	GO:0010640	regulation of platelet-derived growth factor receptor signaling pathway	1/32	24/18670	0.0403592	0.145891	0.105736	APOD	1
GO:0032878	BP	GO:0032878	regulation of establishment or maintenance of cell polarity	1/32	24/18670	0.0403592	0.145891	0.105736	CDH5	1
GO:0045603	BP	GO:0045603	positive regulation of endothelial cell differentiation	1/32	24/18670	0.0403592	0.145891	0.105736	CDH5	1
GO:0046475	BP	GO:0046475	glycerophospholipid catabolic process	1/32	24/18670	0.0403592	0.145891	0.105736	ENPP2	1
GO:2001026	BP	GO:2001026	regulation of endothelial cell chemotaxis	1/32	24/18670	0.0403592	0.145891	0.105736	MET	1
GO:0052547	BP	GO:0052547	regulation of peptidase activity	3/32	452/18670	0.0416244	0.148543	0.107659	A2M/GRN/CST6	3
GO:0006851	BP	GO:0006851	mitochondrial calcium ion transmembrane transport	1/32	25/18670	0.0420061	0.148543	0.107659	PHB2	1
GO:0032461	BP	GO:0032461	positive regulation of protein oligomerization	1/32	25/18670	0.0420061	0.148543	0.107659	JCHAIN	1
GO:0051156	BP	GO:0051156	glucose 6-phosphate metabolic process	1/32	25/18670	0.0420061	0.148543	0.107659	TKT	1
GO:0060444	BP	GO:0060444	branching involved in mammary gland duct morphogenesis	1/32	25/18670	0.0420061	0.148543	0.107659	PHB2	1
GO:2000482	BP	GO:2000482	regulation of interleukin-8 secretion	1/32	25/18670	0.0420061	0.148543	0.107659	SSC5D	1
GO:1904951	BP	GO:1904951	positive regulation of establishment of protein localization	3/32	456/18670	0.0425468	0.149733	0.108521	IGHD/CEP295/ANG	3
GO:0017038	BP	GO:0017038	protein import	2/32	192/18670	0.0426493	0.149733	0.108521	APOD/PHB2	2
GO:0001556	BP	GO:0001556	oocyte maturation	1/32	26/18670	0.0436503	0.151073	0.109492	ANG	1
GO:0003081	BP	GO:0003081	regulation of systemic arterial blood pressure by renin-angiotensin	1/32	26/18670	0.0436503	0.151073	0.109492	ENPEP	1
GO:0033561	BP	GO:0033561	regulation of water loss via skin	1/32	26/18670	0.0436503	0.151073	0.109492	MET	1
GO:0051497	BP	GO:0051497	negative regulation of stress fiber assembly	1/32	26/18670	0.0436503	0.151073	0.109492	MET	1
GO:0001667	BP	GO:0001667	ameboidal-type cell migration	3/32	462/18670	0.0439498	0.151572	0.109854	GRN/MET/ENPP2	3
GO:0001763	BP	GO:0001763	morphogenesis of a branching structure	2/32	196/18670	0.044263	0.151906	0.110096	MET/PHB2	2
GO:0006735	BP	GO:0006735	NADH regeneration	1/32	27/18670	0.0452917	0.151906	0.110096	PKM	1
GO:0048143	BP	GO:0048143	astrocyte activation	1/32	27/18670	0.0452917	0.151906	0.110096	GRN	1
GO:0061621	BP	GO:0061621	canonical glycolysis	1/32	27/18670	0.0452917	0.151906	0.110096	PKM	1
GO:0061718	BP	GO:0061718	glucose catabolic process to pyruvate	1/32	27/18670	0.0452917	0.151906	0.110096	PKM	1
GO:0072376	BP	GO:0072376	protein activation cascade	1/32	27/18670	0.0452917	0.151906	0.110096	A2M	1
GO:0072378	BP	GO:0072378	blood coagulation, fibrin clot formation	1/32	27/18670	0.0452917	0.151906	0.110096	A2M	1
GO:2001039	BP	GO:2001039	negative regulation of cellular response to drug	1/32	27/18670	0.0452917	0.151906	0.110096	MET	1
GO:0033598	BP	GO:0033598	mammary gland epithelial cell proliferation	1/32	28/18670	0.0469305	0.154223	0.111775	PHB2	1
GO:0034377	BP	GO:0034377	plasma lipoprotein particle assembly	1/32	28/18670	0.0469305	0.154223	0.111775	APOC4	1
GO:0048679	BP	GO:0048679	regulation of axon regeneration	1/32	28/18670	0.0469305	0.154223	0.111775	GRN	1
GO:0061615	BP	GO:0061615	glycolytic process through fructose-6-phosphate	1/32	28/18670	0.0469305	0.154223	0.111775	PKM	1
GO:0061620	BP	GO:0061620	glycolytic process through glucose-6-phosphate	1/32	28/18670	0.0469305	0.154223	0.111775	PKM	1
GO:1902745	BP	GO:1902745	positive regulation of lamellipodium organization	1/32	28/18670	0.0469305	0.154223	0.111775	ENPP2	1
GO:0050679	BP	GO:0050679	positive regulation of epithelial cell proliferation	2/32	206/18670	0.0483958	0.156956	0.113756	ANG/GRN	2
GO:0031116	BP	GO:0031116	positive regulation of microtubule polymerization	1/32	29/18670	0.0485664	0.156956	0.113756	MET	1
GO:0032232	BP	GO:0032232	negative regulation of actin filament bundle assembly	1/32	29/18670	0.0485664	0.156956	0.113756	MET	1
GO:0072606	BP	GO:0072606	interleukin-8 secretion	1/32	29/18670	0.0485664	0.156956	0.113756	SSC5D	1
GO:1900181	BP	GO:1900181	negative regulation of protein localization to nucleus	1/32	29/18670	0.0485664	0.156956	0.113756	APOD	1
GO:0002064	BP	GO:0002064	epithelial cell development	2/32	207/18670	0.0488167	0.157035	0.113813	CDH5/MET	2
GO:0048871	BP	GO:0048871	multicellular organismal homeostasis	3/32	486/18670	0.0497937	0.157035	0.113813	JCHAIN/DBH/MET	3
GO:0030178	BP	GO:0030178	negative regulation of Wnt signaling pathway	2/32	210/18670	0.0500874	0.157035	0.113813	IGFBP4/IGFBP1	2
GO:0050707	BP	GO:0050707	regulation of cytokine secretion	2/32	210/18670	0.0500874	0.157035	0.113813	IGHD/SSC5D	2
GO:0009595	BP	GO:0009595	detection of biotic stimulus	1/32	30/18670	0.0501997	0.157035	0.113813	SSC5D	1
GO:0019098	BP	GO:0019098	reproductive behavior	1/32	30/18670	0.0501997	0.157035	0.113813	DBH	1
GO:0043171	BP	GO:0043171	peptide catabolic process	1/32	30/18670	0.0501997	0.157035	0.113813	ENPEP	1
GO:0048265	BP	GO:0048265	response to pain	1/32	30/18670	0.0501997	0.157035	0.113813	DBH	1
GO:1901889	BP	GO:1901889	negative regulation of cell junction assembly	1/32	30/18670	0.0501997	0.157035	0.113813	APOD	1
GO:1903205	BP	GO:1903205	regulation of hydrogen peroxide-induced cell death	1/32	30/18670	0.0501997	0.157035	0.113813	MET	1
GO:1903531	BP	GO:1903531	negative regulation of secretion by cell	2/32	212/18670	0.0509412	0.158845	0.115125	STXBP5L/SSC5D	2
GO:0007202	BP	GO:0007202	activation of phospholipase C activity	1/32	31/18670	0.0518303	0.160083	0.116022	ANG	1
GO:0010458	BP	GO:0010458	exit from mitosis	1/32	31/18670	0.0518303	0.160083	0.116022	PHB2	1
GO:0035767	BP	GO:0035767	endothelial cell chemotaxis	1/32	31/18670	0.0518303	0.160083	0.116022	MET	1
GO:0032869	BP	GO:0032869	cellular response to insulin stimulus	2/32	216/18670	0.0526647	0.160768	0.116519	PKM/IGFBP1	2
GO:0017157	BP	GO:0017157	regulation of exocytosis	2/32	217/18670	0.0530989	0.160768	0.116519	SYT13/STXBP5L	2
GO:0050900	BP	GO:0050900	leukocyte migration	3/32	499/18670	0.0531122	0.160768	0.116519	JCHAIN/DBH/APOD	3
GO:0001975	BP	GO:0001975	response to amphetamine	1/32	32/18670	0.0534581	0.160768	0.116519	DBH	1
GO:0006739	BP	GO:0006739	NADP metabolic process	1/32	32/18670	0.0534581	0.160768	0.116519	TKT	1
GO:0045907	BP	GO:0045907	positive regulation of vasoconstriction	1/32	32/18670	0.0534581	0.160768	0.116519	DBH	1
GO:0065005	BP	GO:0065005	protein-lipid complex assembly	1/32	32/18670	0.0534581	0.160768	0.116519	APOC4	1
GO:0070570	BP	GO:0070570	regulation of neuron projection regeneration	1/32	32/18670	0.0534581	0.160768	0.116519	GRN	1
GO:0032271	BP	GO:0032271	regulation of protein polymerization	2/32	218/18670	0.0535344	0.160768	0.116519	CDH5/MET	2
GO:0009303	BP	GO:0009303	rRNA transcription	1/32	33/18670	0.0550833	0.163408	0.118432	ANG	1
GO:0030513	BP	GO:0030513	positive regulation of BMP signaling pathway	1/32	33/18670	0.0550833	0.163408	0.118432	CDH5	1
GO:0031112	BP	GO:0031112	positive regulation of microtubule polymerization or depolymerization	1/32	33/18670	0.0550833	0.163408	0.118432	MET	1
GO:0060603	BP	GO:0060603	mammary gland duct morphogenesis	1/32	33/18670	0.0550833	0.163408	0.118432	PHB2	1
GO:0007160	BP	GO:0007160	cell-matrix adhesion	2/32	225/18670	0.0566186	0.165208	0.119737	APOD/SNED1	2
GO:0003382	BP	GO:0003382	epithelial cell morphogenesis	1/32	34/18670	0.0567057	0.165208	0.119737	MET	1
GO:0016486	BP	GO:0016486	peptide hormone processing	1/32	34/18670	0.0567057	0.165208	0.119737	ENPEP	1
GO:0032148	BP	GO:0032148	activation of protein kinase B activity	1/32	34/18670	0.0567057	0.165208	0.119737	ANG	1
GO:0036474	BP	GO:0036474	cell death in response to hydrogen peroxide	1/32	34/18670	0.0567057	0.165208	0.119737	MET	1
GO:0140448	BP	GO:0140448	signaling receptor ligand precursor processing	1/32	34/18670	0.0567057	0.165208	0.119737	ENPEP	1
GO:0051495	BP	GO:0051495	positive regulation of cytoskeleton organization	2/32	226/18670	0.0570643	0.165758	0.120135	CEP295/MET	2
GO:0033144	BP	GO:0033144	negative regulation of intracellular steroid hormone receptor signaling pathway	1/32	35/18670	0.0583254	0.168162	0.121878	PHB2	1
GO:2001024	BP	GO:2001024	negative regulation of response to drug	1/32	35/18670	0.0583254	0.168162	0.121878	MET	1
GO:0010594	BP	GO:0010594	regulation of endothelial cell migration	2/32	229/18670	0.0584089	0.168162	0.121878	GRN/MET	2
GO:0000302	BP	GO:0000302	response to reactive oxygen species	2/32	232/18670	0.0597645	0.171056	0.123975	APOD/MET	2
GO:0071695	BP	GO:0071695	anatomical structure maturation	2/32	232/18670	0.0597645	0.171056	0.123975	ANG/CDH5	2
GO:0006007	BP	GO:0006007	glucose catabolic process	1/32	36/18670	0.0599425	0.171064	0.123981	PKM	1
GO:0007099	BP	GO:0007099	centriole replication	1/32	37/18670	0.0615568	0.174143	0.126213	CEP295	1
GO:0030212	BP	GO:0030212	hyaluronan metabolic process	1/32	37/18670	0.0615568	0.174143	0.126213	STAB2	1
GO:0031111	BP	GO:0031111	negative regulation of microtubule polymerization or depolymerization	1/32	37/18670	0.0615568	0.174143	0.126213	CDH5	1
GO:0051048	BP	GO:0051048	negative regulation of secretion	2/32	238/18670	0.0625087	0.176325	0.127794	STXBP5L/SSC5D	2
GO:0033002	BP	GO:0033002	muscle cell proliferation	2/32	239/18670	0.0629703	0.176655	0.128033	APOD/ANG	2
GO:0046676	BP	GO:0046676	negative regulation of insulin secretion	1/32	38/18670	0.0631685	0.176655	0.128033	STXBP5L	1
GO:0050716	BP	GO:0050716	positive regulation of interleukin-1 secretion	1/32	38/18670	0.0631685	0.176655	0.128033	IGHD	1
GO:0050663	BP	GO:0050663	cytokine secretion	2/32	240/18670	0.063433	0.176887	0.128201	IGHD/SSC5D	2
GO:0042593	BP	GO:0042593	glucose homeostasis	2/32	241/18670	0.0638969	0.177095	0.128352	DBH/STXBP5L	2
GO:0033500	BP	GO:0033500	carbohydrate homeostasis	2/32	242/18670	0.064362	0.177095	0.128352	DBH/STXBP5L	2
GO:0033146	BP	GO:0033146	regulation of intracellular estrogen receptor signaling pathway	1/32	39/18670	0.0647775	0.177095	0.128352	PHB2	1
GO:0042417	BP	GO:0042417	dopamine metabolic process	1/32	39/18670	0.0647775	0.177095	0.128352	DBH	1
GO:0043114	BP	GO:0043114	regulation of vascular permeability	1/32	39/18670	0.0647775	0.177095	0.128352	CDH5	1
GO:0055090	BP	GO:0055090	acylglycerol homeostasis	1/32	39/18670	0.0647775	0.177095	0.128352	APOC4	1
GO:0070328	BP	GO:0070328	triglyceride homeostasis	1/32	39/18670	0.0647775	0.177095	0.128352	APOC4	1
GO:0001990	BP	GO:0001990	regulation of systemic arterial blood pressure by hormone	1/32	40/18670	0.0663838	0.177508	0.128652	ENPEP	1
GO:0006734	BP	GO:0006734	NADH metabolic process	1/32	40/18670	0.0663838	0.177508	0.128652	PKM	1
GO:0009395	BP	GO:0009395	phospholipid catabolic process	1/32	40/18670	0.0663838	0.177508	0.128652	ENPP2	1
GO:0014046	BP	GO:0014046	dopamine secretion	1/32	40/18670	0.0663838	0.177508	0.128652	SYT13	1
GO:0014059	BP	GO:0014059	regulation of dopamine secretion	1/32	40/18670	0.0663838	0.177508	0.128652	SYT13	1
GO:0042596	BP	GO:0042596	fear response	1/32	40/18670	0.0663838	0.177508	0.128652	DBH	1
GO:0071526	BP	GO:0071526	semaphorin-plexin signaling pathway	1/32	40/18670	0.0663838	0.177508	0.128652	MET	1
GO:0098534	BP	GO:0098534	centriole assembly	1/32	40/18670	0.0663838	0.177508	0.128652	CEP295	1
GO:0043403	BP	GO:0043403	skeletal muscle tissue regeneration	1/32	41/18670	0.0679874	0.179701	0.130241	PKM	1
GO:0061028	BP	GO:0061028	establishment of endothelial barrier	1/32	41/18670	0.0679874	0.179701	0.130241	CDH5	1
GO:0090317	BP	GO:0090317	negative regulation of intracellular protein transport	1/32	41/18670	0.0679874	0.179701	0.130241	APOD	1
GO:0150077	BP	GO:0150077	regulation of neuroinflammatory response	1/32	41/18670	0.0679874	0.179701	0.130241	GRN	1
GO:0010951	BP	GO:0010951	negative regulation of endopeptidase activity	2/32	250/18670	0.0681245	0.179701	0.130241	A2M/CST6	2
GO:0044088	BP	GO:0044088	regulation of vacuole organization	1/32	42/18670	0.0695884	0.182358	0.132166	GRN	1
GO:1901031	BP	GO:1901031	regulation of response to reactive oxygen species	1/32	42/18670	0.0695884	0.182358	0.132166	MET	1
GO:0001953	BP	GO:0001953	negative regulation of cell-matrix adhesion	1/32	43/18670	0.0711867	0.182358	0.132166	APOD	1
GO:0010824	BP	GO:0010824	regulation of centrosome duplication	1/32	43/18670	0.0711867	0.182358	0.132166	CEP295	1
GO:0010863	BP	GO:0010863	positive regulation of phospholipase C activity	1/32	43/18670	0.0711867	0.182358	0.132166	ANG	1
GO:0017158	BP	GO:0017158	regulation of calcium ion-dependent exocytosis	1/32	43/18670	0.0711867	0.182358	0.132166	SYT13	1
GO:0032459	BP	GO:0032459	regulation of protein oligomerization	1/32	43/18670	0.0711867	0.182358	0.132166	JCHAIN	1
GO:0046460	BP	GO:0046460	neutral lipid biosynthetic process	1/32	43/18670	0.0711867	0.182358	0.132166	ANG	1
GO:0046463	BP	GO:0046463	acylglycerol biosynthetic process	1/32	43/18670	0.0711867	0.182358	0.132166	ANG	1
GO:1901985	BP	GO:1901985	positive regulation of protein acetylation	1/32	43/18670	0.0711867	0.182358	0.132166	CEP295	1
GO:2001038	BP	GO:2001038	regulation of cellular response to drug	1/32	43/18670	0.0711867	0.182358	0.132166	MET	1
GO:0014002	BP	GO:0014002	astrocyte development	1/32	44/18670	0.0727823	0.183554	0.133033	GRN	1
GO:0035307	BP	GO:0035307	positive regulation of protein dephosphorylation	1/32	44/18670	0.0727823	0.183554	0.133033	CDH5	1
GO:0044331	BP	GO:0044331	cell-cell adhesion mediated by cadherin	1/32	44/18670	0.0727823	0.183554	0.133033	CDH5	1
GO:0045601	BP	GO:0045601	regulation of endothelial cell differentiation	1/32	44/18670	0.0727823	0.183554	0.133033	CDH5	1
GO:0046189	BP	GO:0046189	phenol-containing compound biosynthetic process	1/32	44/18670	0.0727823	0.183554	0.133033	DBH	1
GO:2000404	BP	GO:2000404	regulation of T cell migration	1/32	44/18670	0.0727823	0.183554	0.133033	APOD	1
GO:0010466	BP	GO:0010466	negative regulation of peptidase activity	2/32	262/18670	0.0739029	0.184239	0.13353	A2M/CST6	2
GO:0034504	BP	GO:0034504	protein localization to nucleus	2/32	262/18670	0.0739029	0.184239	0.13353	APOD/PHB2	2
GO:0001974	BP	GO:0001974	blood vessel remodeling	1/32	45/18670	0.0743753	0.184239	0.13353	DBH	1
GO:0071827	BP	GO:0071827	plasma lipoprotein particle organization	1/32	45/18670	0.0743753	0.184239	0.13353	APOC4	1
GO:0090278	BP	GO:0090278	negative regulation of peptide hormone secretion	1/32	45/18670	0.0743753	0.184239	0.13353	STXBP5L	1
GO:1900274	BP	GO:1900274	regulation of phospholipase C activity	1/32	45/18670	0.0743753	0.184239	0.13353	ANG	1
GO:1902743	BP	GO:1902743	regulation of lamellipodium organization	1/32	45/18670	0.0743753	0.184239	0.13353	ENPP2	1
GO:0006984	BP	GO:0006984	ER-nucleus signaling pathway	1/32	46/18670	0.0759657	0.184894	0.134004	IGFBP1	1
GO:0010883	BP	GO:0010883	regulation of lipid storage	1/32	46/18670	0.0759657	0.184894	0.134004	APOC4	1
GO:0014075	BP	GO:0014075	response to amine	1/32	46/18670	0.0759657	0.184894	0.134004	DBH	1
GO:0019731	BP	GO:0019731	antibacterial humoral response	1/32	46/18670	0.0759657	0.184894	0.134004	JCHAIN	1
GO:0048599	BP	GO:0048599	oocyte development	1/32	46/18670	0.0759657	0.184894	0.134004	ANG	1
GO:0060443	BP	GO:0060443	mammary gland morphogenesis	1/32	46/18670	0.0759657	0.184894	0.134004	PHB2	1
GO:1900015	BP	GO:1900015	regulation of cytokine production involved in inflammatory response	1/32	46/18670	0.0759657	0.184894	0.134004	APOD	1
GO:0050714	BP	GO:0050714	positive regulation of protein secretion	2/32	268/18670	0.0768504	0.186582	0.135228	IGHD/ANG	2
GO:0032868	BP	GO:0032868	response to insulin	2/32	272/18670	0.0788363	0.189311	0.137206	PKM/IGFBP1	2
GO:0001774	BP	GO:0001774	microglial cell activation	1/32	48/18670	0.0791384	0.189311	0.137206	GRN	1
GO:0002269	BP	GO:0002269	leukocyte activation involved in inflammatory response	1/32	48/18670	0.0791384	0.189311	0.137206	GRN	1
GO:0008542	BP	GO:0008542	visual learning	1/32	48/18670	0.0791384	0.189311	0.137206	DBH	1
GO:0010862	BP	GO:0010862	positive regulation of pathway-restricted SMAD protein phosphorylation	1/32	48/18670	0.0791384	0.189311	0.137206	INHBE	1
GO:0016339	BP	GO:0016339	calcium-dependent cell-cell adhesion via plasma membrane cell adhesion molecules	1/32	48/18670	0.0791384	0.189311	0.137206	CDH5	1
GO:0098742	BP	GO:0098742	cell-cell adhesion via plasma-membrane adhesion molecules	2/32	273/18670	0.0793354	0.189319	0.137211	CDH5/PCDH18	2
GO:0043542	BP	GO:0043542	endothelial cell migration	2/32	274/18670	0.0798355	0.190047	0.137739	GRN/MET	2
GO:0002534	BP	GO:0002534	cytokine production involved in inflammatory response	1/32	49/18670	0.0807208	0.190298	0.137921	APOD	1
GO:0002686	BP	GO:0002686	negative regulation of leukocyte migration	1/32	49/18670	0.0807208	0.190298	0.137921	APOD	1
GO:0003044	BP	GO:0003044	regulation of systemic arterial blood pressure mediated by a chemical signal	1/32	49/18670	0.0807208	0.190298	0.137921	ENPEP	1
GO:0071825	BP	GO:0071825	protein-lipid complex subunit organization	1/32	49/18670	0.0807208	0.190298	0.137921	APOC4	1
GO:0009994	BP	GO:0009994	oocyte differentiation	1/32	51/18670	0.0838777	0.195381	0.141605	ANG	1
GO:0019674	BP	GO:0019674	NAD metabolic process	1/32	51/18670	0.0838777	0.195381	0.141605	PKM	1
GO:0045744	BP	GO:0045744	negative regulation of G protein-coupled receptor signaling pathway	1/32	51/18670	0.0838777	0.195381	0.141605	MET	1
GO:0051452	BP	GO:0051452	intracellular pH reduction	1/32	51/18670	0.0838777	0.195381	0.141605	GRN	1
GO:0097366	BP	GO:0097366	response to bronchodilator	1/32	51/18670	0.0838777	0.195381	0.141605	DBH	1
GO:0021700	BP	GO:0021700	developmental maturation	2/32	284/18670	0.0848911	0.196701	0.142562	ANG/CDH5	2
GO:0031647	BP	GO:0031647	regulation of protein stability	2/32	284/18670	0.0848911	0.196701	0.142562	GRN/PHB2	2
GO:0006754	BP	GO:0006754	ATP biosynthetic process	1/32	52/18670	0.0854522	0.196701	0.142562	PKM	1
GO:0015872	BP	GO:0015872	dopamine transport	1/32	52/18670	0.0854522	0.196701	0.142562	SYT13	1
GO:0046580	BP	GO:0046580	negative regulation of Ras protein signal transduction	1/32	52/18670	0.0854522	0.196701	0.142562	MET	1
GO:0060828	BP	GO:0060828	regulation of canonical Wnt signaling pathway	2/32	286/18670	0.085914	0.197299	0.142995	IGFBP4/IGFBP1	2
GO:0002793	BP	GO:0002793	positive regulation of peptide secretion	2/32	288/18670	0.0869407	0.197525	0.143158	IGHD/ANG	2
GO:0007632	BP	GO:0007632	visual behavior	1/32	53/18670	0.0870241	0.197525	0.143158	DBH	1
GO:0045840	BP	GO:0045840	positive regulation of mitotic nuclear division	1/32	53/18670	0.0870241	0.197525	0.143158	PHB2	1
GO:0045851	BP	GO:0045851	pH reduction	1/32	53/18670	0.0870241	0.197525	0.143158	GRN	1
GO:0050704	BP	GO:0050704	regulation of interleukin-1 secretion	1/32	53/18670	0.0870241	0.197525	0.143158	IGHD	1
GO:0006584	BP	GO:0006584	catecholamine metabolic process	1/32	54/18670	0.0885934	0.200155	0.145065	DBH	1
GO:0009712	BP	GO:0009712	catechol-containing compound metabolic process	1/32	54/18670	0.0885934	0.200155	0.145065	DBH	1
GO:0090287	BP	GO:0090287	regulation of cellular response to growth factor stimulus	2/32	292/18670	0.0890054	0.200622	0.145403	CDH5/FSTL1	2
GO:0001541	BP	GO:0001541	ovarian follicle development	1/32	55/18670	0.0901601	0.201364	0.145941	ANG	1
GO:0006576	BP	GO:0006576	cellular biogenic amine metabolic process	1/32	55/18670	0.0901601	0.201364	0.145941	DBH	1
GO:0042306	BP	GO:0042306	regulation of protein import into nucleus	1/32	55/18670	0.0901601	0.201364	0.145941	APOD	1
GO:0043030	BP	GO:0043030	regulation of macrophage activation	1/32	55/18670	0.0901601	0.201364	0.145941	GRN	1
GO:0001818	BP	GO:0001818	negative regulation of cytokine production	2/32	296/18670	0.0910851	0.202966	0.147102	APOD/SSC5D	2
GO:0060688	BP	GO:0060688	regulation of morphogenesis of a branching structure	1/32	56/18670	0.0917241	0.203461	0.147461	PHB2	1
GO:1903202	BP	GO:1903202	negative regulation of oxidative stress-induced cell death	1/32	56/18670	0.0917241	0.203461	0.147461	MET	1
GO:0090068	BP	GO:0090068	positive regulation of cell cycle process	2/32	298/18670	0.0921304	0.203899	0.147778	CEP295/PHB2	2
GO:0019320	BP	GO:0019320	hexose catabolic process	1/32	57/18670	0.0932856	0.204599	0.148286	PKM	1
GO:0043525	BP	GO:0043525	positive regulation of neuron apoptotic process	1/32	57/18670	0.0932856	0.204599	0.148286	GRN	1
GO:0048008	BP	GO:0048008	platelet-derived growth factor receptor signaling pathway	1/32	57/18670	0.0932856	0.204599	0.148286	APOD	1
GO:1900408	BP	GO:1900408	negative regulation of cellular response to oxidative stress	1/32	57/18670	0.0932856	0.204599	0.148286	MET	1
GO:0019229	BP	GO:0019229	regulation of vasoconstriction	1/32	58/18670	0.0948444	0.204797	0.148429	DBH	1
GO:0030520	BP	GO:0030520	intracellular estrogen receptor signaling pathway	1/32	58/18670	0.0948444	0.204797	0.148429	PHB2	1
GO:0035306	BP	GO:0035306	positive regulation of dephosphorylation	1/32	58/18670	0.0948444	0.204797	0.148429	CDH5	1
GO:0046605	BP	GO:0046605	regulation of centrosome cycle	1/32	58/18670	0.0948444	0.204797	0.148429	CEP295	1
GO:0051058	BP	GO:0051058	negative regulation of small GTPase mediated signal transduction	1/32	58/18670	0.0948444	0.204797	0.148429	MET	1
GO:0061900	BP	GO:0061900	glial cell activation	1/32	58/18670	0.0948444	0.204797	0.148429	GRN	1
GO:1904589	BP	GO:1904589	regulation of protein import	1/32	58/18670	0.0948444	0.204797	0.148429	APOD	1
GO:0045088	BP	GO:0045088	regulation of innate immune response	2/32	305/18670	0.0958173	0.206331	0.149541	A2M/GRN	2
GO:0010518	BP	GO:0010518	positive regulation of phospholipase activity	1/32	59/18670	0.0964007	0.206331	0.149541	ANG	1
GO:0032732	BP	GO:0032732	positive regulation of interleukin-1 production	1/32	59/18670	0.0964007	0.206331	0.149541	IGHD	1
GO:1902883	BP	GO:1902883	negative regulation of response to oxidative stress	1/32	59/18670	0.0964007	0.206331	0.149541	MET	1
GO:0051893	BP	GO:0051893	regulation of focal adhesion assembly	1/32	60/18670	0.0979543	0.207834	0.15063	APOD	1
GO:0090109	BP	GO:0090109	regulation of cell-substrate junction assembly	1/32	60/18670	0.0979543	0.207834	0.15063	APOD	1
GO:0150116	BP	GO:0150116	regulation of cell-substrate junction organization	1/32	60/18670	0.0979543	0.207834	0.15063	APOD	1
GO:1902808	BP	GO:1902808	positive regulation of cell cycle G1/S phase transition	1/32	60/18670	0.0979543	0.207834	0.15063	PHB2	1
GO:0006027	BP	GO:0006027	glycosaminoglycan catabolic process	1/32	61/18670	0.0995054	0.208854	0.15137	STAB2	1
GO:0006081	BP	GO:0006081	cellular aldehyde metabolic process	1/32	61/18670	0.0995054	0.208854	0.15137	TKT	1
GO:0007040	BP	GO:0007040	lysosome organization	1/32	61/18670	0.0995054	0.208854	0.15137	GRN	1
GO:0050701	BP	GO:0050701	interleukin-1 secretion	1/32	61/18670	0.0995054	0.208854	0.15137	IGHD	1
GO:0080171	BP	GO:0080171	lytic vacuole organization	1/32	61/18670	0.0995054	0.208854	0.15137	GRN	1
GO:0006898	BP	GO:0006898	receptor-mediated endocytosis	2/32	314/18670	0.10062	0.209848	0.15209	JCHAIN/STAB2	2
GO:0032387	BP	GO:0032387	negative regulation of intracellular transport	1/32	62/18670	0.101054	0.209848	0.15209	APOD	1
GO:0032835	BP	GO:0032835	glomerulus development	1/32	62/18670	0.101054	0.209848	0.15209	ENPEP	1
GO:0050433	BP	GO:0050433	regulation of catecholamine secretion	1/32	62/18670	0.101054	0.209848	0.15209	SYT13	1
GO:0060393	BP	GO:0060393	regulation of pathway-restricted SMAD protein phosphorylation	1/32	62/18670	0.101054	0.209848	0.15209	INHBE	1
GO:0007062	BP	GO:0007062	sister chromatid cohesion	1/32	63/18670	0.1026	0.21126	0.153114	PHB2	1
GO:0009206	BP	GO:0009206	purine ribonucleoside triphosphate biosynthetic process	1/32	63/18670	0.1026	0.21126	0.153114	PKM	1
GO:0046888	BP	GO:0046888	negative regulation of hormone secretion	1/32	63/18670	0.1026	0.21126	0.153114	STXBP5L	1
GO:2000401	BP	GO:2000401	regulation of lymphocyte migration	1/32	63/18670	0.1026	0.21126	0.153114	APOD	1
GO:0009145	BP	GO:0009145	purine nucleoside triphosphate biosynthetic process	1/32	64/18670	0.104143	0.212286	0.153857	PKM	1
GO:0046503	BP	GO:0046503	glycerolipid catabolic process	1/32	64/18670	0.104143	0.212286	0.153857	ENPP2	1
GO:0050432	BP	GO:0050432	catecholamine secretion	1/32	64/18670	0.104143	0.212286	0.153857	SYT13	1
GO:1903672	BP	GO:1903672	positive regulation of sprouting angiogenesis	1/32	64/18670	0.104143	0.212286	0.153857	PKM	1
GO:0007568	BP	GO:0007568	aging	2/32	321/18670	0.104403	0.212286	0.153857	APOD/IGFBP1	2
GO:0071375	BP	GO:0071375	cellular response to peptide hormone stimulus	2/32	321/18670	0.104403	0.212286	0.153857	PKM/IGFBP1	2
GO:0060562	BP	GO:0060562	epithelial tube morphogenesis	2/32	322/18670	0.104947	0.212675	0.154139	MET/PHB2	2
GO:0006026	BP	GO:0006026	aminoglycan catabolic process	1/32	65/18670	0.105684	0.212675	0.154139	STAB2	1
GO:0007029	BP	GO:0007029	endoplasmic reticulum organization	1/32	65/18670	0.105684	0.212675	0.154139	LMAN2	1
GO:0060389	BP	GO:0060389	pathway-restricted SMAD protein phosphorylation	1/32	65/18670	0.105684	0.212675	0.154139	INHBE	1
GO:0072678	BP	GO:0072678	T cell migration	1/32	65/18670	0.105684	0.212675	0.154139	APOD	1
GO:0017156	BP	GO:0017156	calcium-ion regulated exocytosis	1/32	66/18670	0.107222	0.214885	0.15574	SYT13	1
GO:0051785	BP	GO:0051785	positive regulation of nuclear division	1/32	66/18670	0.107222	0.214885	0.15574	PHB2	1
GO:0046677	BP	GO:0046677	response to antibiotic	2/32	327/18670	0.107677	0.215353	0.15608	DBH/MET	2
GO:0030858	BP	GO:0030858	positive regulation of epithelial cell differentiation	1/32	67/18670	0.108758	0.216186	0.156684	CDH5	1
GO:0046365	BP	GO:0046365	monosaccharide catabolic process	1/32	67/18670	0.108758	0.216186	0.156684	PKM	1
GO:0051298	BP	GO:0051298	centrosome duplication	1/32	67/18670	0.108758	0.216186	0.156684	CEP295	1
GO:0010812	BP	GO:0010812	negative regulation of cell-substrate adhesion	1/32	68/18670	0.110291	0.217462	0.157609	APOD	1
GO:0019915	BP	GO:0019915	lipid storage	1/32	68/18670	0.110291	0.217462	0.157609	APOC4	1
GO:0050891	BP	GO:0050891	multicellular organismal water homeostasis	1/32	68/18670	0.110291	0.217462	0.157609	MET	1
GO:0050918	BP	GO:0050918	positive chemotaxis	1/32	68/18670	0.110291	0.217462	0.157609	MET	1
GO:0009201	BP	GO:0009201	ribonucleoside triphosphate biosynthetic process	1/32	69/18670	0.111821	0.218713	0.158515	PKM	1
GO:0034381	BP	GO:0034381	plasma lipoprotein particle clearance	1/32	69/18670	0.111821	0.218713	0.158515	APOC4	1
GO:0050766	BP	GO:0050766	positive regulation of phagocytosis	1/32	69/18670	0.111821	0.218713	0.158515	LMAN2	1
GO:0071300	BP	GO:0071300	cellular response to retinoic acid	1/32	69/18670	0.111821	0.218713	0.158515	PHB2	1
GO:0060070	BP	GO:0060070	canonical Wnt signaling pathway	2/32	335/18670	0.112085	0.21879	0.158571	IGFBP4/IGFBP1	2
GO:0010517	BP	GO:0010517	regulation of phospholipase activity	1/32	70/18670	0.113349	0.220376	0.159721	ANG	1
GO:0060395	BP	GO:0060395	SMAD protein signal transduction	1/32	70/18670	0.113349	0.220376	0.159721	INHBE	1
GO:0051056	BP	GO:0051056	regulation of small GTPase mediated signal transduction	2/32	338/18670	0.113751	0.220717	0.159968	A2M/MET	2
GO:0032272	BP	GO:0032272	negative regulation of protein polymerization	1/32	72/18670	0.116398	0.224349	0.162599	CDH5	1
GO:0060193	BP	GO:0060193	positive regulation of lipase activity	1/32	72/18670	0.116398	0.224349	0.162599	ANG	1
GO:0061180	BP	GO:0061180	mammary gland epithelium development	1/32	72/18670	0.116398	0.224349	0.162599	PHB2	1
GO:0006913	BP	GO:0006913	nucleocytoplasmic transport	2/32	343/18670	0.116542	0.224349	0.162599	APOD/PHB2	2
GO:0031100	BP	GO:0031100	animal organ regeneration	1/32	73/18670	0.117918	0.225037	0.163099	PKM	1
GO:0033555	BP	GO:0033555	multicellular organismal response to stress	1/32	73/18670	0.117918	0.225037	0.163099	DBH	1
GO:1901983	BP	GO:1901983	regulation of protein acetylation	1/32	73/18670	0.117918	0.225037	0.163099	CEP295	1
GO:1903524	BP	GO:1903524	positive regulation of blood circulation	1/32	73/18670	0.117918	0.225037	0.163099	DBH	1
GO:0051169	BP	GO:0051169	nuclear transport	2/32	346/18670	0.118225	0.225037	0.163099	APOD/PHB2	2
GO:0001895	BP	GO:0001895	retina homeostasis	1/32	74/18670	0.119436	0.225037	0.163099	JCHAIN	1
GO:0030104	BP	GO:0030104	water homeostasis	1/32	74/18670	0.119436	0.225037	0.163099	MET	1
GO:0032677	BP	GO:0032677	regulation of interleukin-8 production	1/32	74/18670	0.119436	0.225037	0.163099	SSC5D	1
GO:0050710	BP	GO:0050710	negative regulation of cytokine secretion	1/32	74/18670	0.119436	0.225037	0.163099	SSC5D	1
GO:1901616	BP	GO:1901616	organic hydroxy compound catabolic process	1/32	74/18670	0.119436	0.225037	0.163099	DBH	1
GO:1903036	BP	GO:1903036	positive regulation of response to wounding	1/32	74/18670	0.119436	0.225037	0.163099	GRN	1
GO:0033143	BP	GO:0033143	regulation of intracellular steroid hormone receptor signaling pathway	1/32	75/18670	0.120951	0.226146	0.163902	PHB2	1
GO:0150076	BP	GO:0150076	neuroinflammatory response	1/32	75/18670	0.120951	0.226146	0.163902	GRN	1
GO:1902117	BP	GO:1902117	positive regulation of organelle assembly	1/32	75/18670	0.120951	0.226146	0.163902	CEP295	1
GO:1903201	BP	GO:1903201	regulation of oxidative stress-induced cell death	1/32	75/18670	0.120951	0.226146	0.163902	MET	1
GO:1902903	BP	GO:1902903	regulation of supramolecular fiber organization	2/32	353/18670	0.122177	0.228001	0.165247	CDH5/MET	2
GO:0042310	BP	GO:0042310	vasoconstriction	1/32	76/18670	0.122464	0.2281	0.165319	DBH	1
GO:0031589	BP	GO:0031589	cell-substrate adhesion	2/32	354/18670	0.122744	0.228187	0.165381	APOD/SNED1	2
GO:0001505	BP	GO:0001505	regulation of neurotransmitter levels	2/32	355/18670	0.123312	0.228731	0.165776	DBH/STXBP5L	2
GO:0009205	BP	GO:0009205	purine ribonucleoside triphosphate metabolic process	1/32	77/18670	0.123974	0.228731	0.165776	PKM	1
GO:0051937	BP	GO:0051937	catecholamine transport	1/32	77/18670	0.123974	0.228731	0.165776	SYT13	1
GO:0090502	BP	GO:0090502	RNA phosphodiester bond hydrolysis, endonucleolytic	1/32	77/18670	0.123974	0.228731	0.165776	RNASE4	1
GO:0045861	BP	GO:0045861	negative regulation of proteolysis	2/32	358/18670	0.12502	0.229775	0.166532	A2M/CST6	2
GO:0008306	BP	GO:0008306	associative learning	1/32	78/18670	0.125482	0.229775	0.166532	DBH	1
GO:0031016	BP	GO:0031016	pancreas development	1/32	78/18670	0.125482	0.229775	0.166532	MET	1
GO:2000300	BP	GO:2000300	regulation of synaptic vesicle exocytosis	1/32	78/18670	0.125482	0.229775	0.166532	STXBP5L	1
GO:0018108	BP	GO:0018108	peptidyl-tyrosine phosphorylation	2/32	363/18670	0.12788	0.233291	0.16908	MET/ENPP2	2
GO:0030111	BP	GO:0030111	regulation of Wnt signaling pathway	2/32	363/18670	0.12788	0.233291	0.16908	IGFBP4/IGFBP1	2
GO:0009142	BP	GO:0009142	nucleoside triphosphate biosynthetic process	1/32	80/18670	0.12849	0.233966	0.16957	PKM	1
GO:0018212	BP	GO:0018212	peptidyl-tyrosine modification	2/32	366/18670	0.129603	0.234944	0.170279	MET/ENPP2	2
GO:0022617	BP	GO:0022617	extracellular matrix disassembly	1/32	81/18670	0.12999	0.234944	0.170279	A2M	1
GO:0048041	BP	GO:0048041	focal adhesion assembly	1/32	81/18670	0.12999	0.234944	0.170279	APOD	1
GO:0048708	BP	GO:0048708	astrocyte differentiation	1/32	81/18670	0.12999	0.234944	0.170279	GRN	1
GO:0032637	BP	GO:0032637	interleukin-8 production	1/32	82/18670	0.131487	0.235904	0.170974	SSC5D	1
GO:0032642	BP	GO:0032642	regulation of chemokine production	1/32	82/18670	0.131487	0.235904	0.170974	APOD	1
GO:0097581	BP	GO:0097581	lamellipodium organization	1/32	82/18670	0.131487	0.235904	0.170974	ENPP2	1
GO:1905954	BP	GO:1905954	positive regulation of lipid localization	1/32	82/18670	0.131487	0.235904	0.170974	APOC4	1
GO:0009199	BP	GO:0009199	ribonucleoside triphosphate metabolic process	1/32	83/18670	0.132983	0.237278	0.17197	PKM	1
GO:0046470	BP	GO:0046470	phosphatidylcholine metabolic process	1/32	83/18670	0.132983	0.237278	0.17197	ENPP2	1
GO:0071277	BP	GO:0071277	cellular response to calcium ion	1/32	83/18670	0.132983	0.237278	0.17197	SYT13	1
GO:0006910	BP	GO:0006910	phagocytosis, recognition	1/32	84/18670	0.134475	0.237338	0.172014	IGHD	1
GO:0010507	BP	GO:0010507	negative regulation of autophagy	1/32	84/18670	0.134475	0.237338	0.172014	MET	1
GO:0050886	BP	GO:0050886	endocrine process	1/32	84/18670	0.134475	0.237338	0.172014	ENPEP	1
GO:0051453	BP	GO:0051453	regulation of intracellular pH	1/32	84/18670	0.134475	0.237338	0.172014	GRN	1
GO:0051492	BP	GO:0051492	regulation of stress fiber assembly	1/32	84/18670	0.134475	0.237338	0.172014	MET	1
GO:0097756	BP	GO:0097756	negative regulation of blood vessel diameter	1/32	84/18670	0.134475	0.237338	0.172014	DBH	1
GO:0009144	BP	GO:0009144	purine nucleoside triphosphate metabolic process	1/32	85/18670	0.135965	0.239535	0.173606	PKM	1
GO:0006890	BP	GO:0006890	retrograde vesicle-mediated transport, Golgi to endoplasmic reticulum	1/32	86/18670	0.137453	0.241719	0.175189	LMAN2	1
GO:0006869	BP	GO:0006869	lipid transport	2/32	380/18670	0.13772	0.241753	0.175214	APOC4/APOD	2
GO:0048477	BP	GO:0048477	oogenesis	1/32	87/18670	0.138938	0.243454	0.176446	ANG	1
GO:0031346	BP	GO:0031346	positive regulation of cell projection organization	2/32	383/18670	0.139474	0.243955	0.17681	GRN/ENPP2	2
GO:0050829	BP	GO:0050829	defense response to Gram-negative bacterium	1/32	88/18670	0.140421	0.24469	0.177342	SSC5D	1
GO:1900407	BP	GO:1900407	regulation of cellular response to oxidative stress	1/32	88/18670	0.140421	0.24469	0.177342	MET	1
GO:1901653	BP	GO:1901653	cellular response to peptide	2/32	385/18670	0.140647	0.24469	0.177342	PKM/IGFBP1	2
GO:0032602	BP	GO:0032602	chemokine production	1/32	89/18670	0.141901	0.246434	0.178606	APOD	1
GO:0045787	BP	GO:0045787	positive regulation of cell cycle	2/32	389/18670	0.142998	0.247241	0.179191	CEP295/PHB2	2
GO:0015844	BP	GO:0015844	monoamine transport	1/32	90/18670	0.143379	0.247241	0.179191	SYT13	1
GO:0030641	BP	GO:0030641	regulation of cellular pH	1/32	90/18670	0.143379	0.247241	0.179191	GRN	1
GO:0042475	BP	GO:0042475	odontogenesis of dentin-containing tooth	1/32	90/18670	0.143379	0.247241	0.179191	AMBN	1
GO:0046364	BP	GO:0046364	monosaccharide biosynthetic process	1/32	91/18670	0.144855	0.248905	0.180397	TKT	1
GO:1901992	BP	GO:1901992	positive regulation of mitotic cell cycle phase transition	1/32	91/18670	0.144855	0.248905	0.180397	PHB2	1
GO:0010639	BP	GO:0010639	negative regulation of organelle organization	2/32	393/18670	0.145359	0.249333	0.180707	CDH5/MET	2
GO:0045833	BP	GO:0045833	negative regulation of lipid metabolic process	1/32	92/18670	0.146327	0.250554	0.181592	APOD	1
GO:0003073	BP	GO:0003073	regulation of systemic arterial blood pressure	1/32	93/18670	0.147798	0.251747	0.182456	ENPEP	1
GO:0036473	BP	GO:0036473	cell death in response to oxidative stress	1/32	93/18670	0.147798	0.251747	0.182456	MET	1
GO:0051952	BP	GO:0051952	regulation of amine transport	1/32	93/18670	0.147798	0.251747	0.182456	SYT13	1
GO:0051289	BP	GO:0051289	protein homotetramerization	1/32	94/18670	0.149266	0.252898	0.183291	PKM	1
GO:1901216	BP	GO:1901216	positive regulation of neuron death	1/32	94/18670	0.149266	0.252898	0.183291	GRN	1
GO:0002831	BP	GO:0002831	regulation of response to biotic stimulus	2/32	400/18670	0.14951	0.252898	0.183291	A2M/GRN	2
GO:0007015	BP	GO:0007015	actin filament organization	2/32	400/18670	0.14951	0.252898	0.183291	ANG/MET	2
GO:0042116	BP	GO:0042116	macrophage activation	1/32	95/18670	0.150731	0.254083	0.18415	GRN	1
GO:0110020	BP	GO:0110020	regulation of actomyosin structure organization	1/32	95/18670	0.150731	0.254083	0.18415	MET	1
GO:1903532	BP	GO:1903532	positive regulation of secretion by cell	2/32	403/18670	0.151297	0.254596	0.184522	IGHD/ANG	2
GO:0008585	BP	GO:0008585	female gonad development	1/32	96/18670	0.152194	0.255666	0.185297	ANG	1
GO:0007044	BP	GO:0007044	cell-substrate junction assembly	1/32	97/18670	0.153655	0.255727	0.185342	APOD	1
GO:0032231	BP	GO:0032231	regulation of actin filament bundle assembly	1/32	97/18670	0.153655	0.255727	0.185342	MET	1
GO:0120162	BP	GO:0120162	positive regulation of cold-induced thermogenesis	1/32	97/18670	0.153655	0.255727	0.185342	DBH	1
GO:0150115	BP	GO:0150115	cell-substrate junction organization	1/32	97/18670	0.153655	0.255727	0.185342	APOD	1
GO:1902882	BP	GO:1902882	regulation of response to oxidative stress	1/32	97/18670	0.153655	0.255727	0.185342	MET	1
GO:0034329	BP	GO:0034329	cell junction assembly	2/32	409/18670	0.154884	0.255727	0.185342	APOD/CDH5	2
GO:0006885	BP	GO:0006885	regulation of pH	1/32	98/18670	0.155113	0.255727	0.185342	GRN	1
GO:0030038	BP	GO:0030038	contractile actin filament bundle assembly	1/32	98/18670	0.155113	0.255727	0.185342	MET	1
GO:0043149	BP	GO:0043149	stress fiber assembly	1/32	98/18670	0.155113	0.255727	0.185342	MET	1
GO:0050764	BP	GO:0050764	regulation of phagocytosis	1/32	98/18670	0.155113	0.255727	0.185342	LMAN2	1
GO:0060191	BP	GO:0060191	regulation of lipase activity	1/32	98/18670	0.155113	0.255727	0.185342	ANG	1
GO:0019216	BP	GO:0019216	regulation of lipid metabolic process	2/32	410/18670	0.155484	0.255906	0.185471	APOD/HELZ2	2
GO:0070301	BP	GO:0070301	cellular response to hydrogen peroxide	1/32	99/18670	0.156569	0.257258	0.186451	MET	1
GO:0046486	BP	GO:0046486	glycerolipid metabolic process	2/32	414/18670	0.157887	0.258775	0.18755	ANG/ENPP2	2
GO:0015837	BP	GO:0015837	amine transport	1/32	100/18670	0.158022	0.258775	0.18755	SYT13	1
GO:0010876	BP	GO:0010876	lipid localization	2/32	415/18670	0.158489	0.258978	0.187698	APOC4/APOD	2
GO:0001558	BP	GO:0001558	regulation of cell growth	2/32	416/18670	0.159091	0.258978	0.187698	IGFBP4/IGFBP1	2
GO:0034440	BP	GO:0034440	lipid oxidation	1/32	101/18670	0.159473	0.258978	0.187698	APOD	1
GO:0046545	BP	GO:0046545	development of primary female sexual characteristics	1/32	101/18670	0.159473	0.258978	0.187698	ANG	1
GO:0097006	BP	GO:0097006	regulation of plasma lipoprotein particle levels	1/32	101/18670	0.159473	0.258978	0.187698	APOC4	1
GO:0018958	BP	GO:0018958	phenol-containing compound metabolic process	1/32	103/18670	0.162368	0.262369	0.190155	DBH	1
GO:0032091	BP	GO:0032091	negative regulation of protein binding	1/32	103/18670	0.162368	0.262369	0.190155	MET	1
GO:0032652	BP	GO:0032652	regulation of interleukin-1 production	1/32	103/18670	0.162368	0.262369	0.190155	IGHD	1
GO:0046822	BP	GO:0046822	regulation of nucleocytoplasmic transport	1/32	104/18670	0.163811	0.263828	0.191213	APOD	1
GO:0046928	BP	GO:0046928	regulation of neurotransmitter secretion	1/32	104/18670	0.163811	0.263828	0.191213	STXBP5L	1
GO:0052548	BP	GO:0052548	regulation of endopeptidase activity	2/32	425/18670	0.164533	0.264553	0.191738	A2M/CST6	2
GO:0051047	BP	GO:0051047	positive regulation of secretion	2/32	428/18670	0.166354	0.26627	0.192983	IGHD/ANG	2
GO:0007041	BP	GO:0007041	lysosomal transport	1/32	106/18670	0.166692	0.26627	0.192983	GRN	1
GO:0042136	BP	GO:0042136	neurotransmitter biosynthetic process	1/32	106/18670	0.166692	0.26627	0.192983	DBH	1
GO:1901989	BP	GO:1901989	positive regulation of cell cycle phase transition	1/32	106/18670	0.166692	0.26627	0.192983	PHB2	1
GO:0051341	BP	GO:0051341	regulation of oxidoreductase activity	1/32	107/18670	0.168128	0.267688	0.19401	PHB2	1
GO:0098781	BP	GO:0098781	ncRNA transcription	1/32	107/18670	0.168128	0.267688	0.19401	ANG	1
GO:0030004	BP	GO:0030004	cellular monovalent inorganic cation homeostasis	1/32	108/18670	0.169562	0.269094	0.195029	GRN	1
GO:0032526	BP	GO:0032526	response to retinoic acid	1/32	108/18670	0.169562	0.269094	0.195029	PHB2	1
GO:0009141	BP	GO:0009141	nucleoside triphosphate metabolic process	1/32	109/18670	0.170994	0.270861	0.19631	PKM	1
GO:0043434	BP	GO:0043434	response to peptide hormone	2/32	436/18670	0.171231	0.270861	0.19631	PKM/IGFBP1	2
GO:0051222	BP	GO:0051222	positive regulation of protein transport	2/32	440/18670	0.173679	0.274115	0.198669	IGHD/ANG	2
GO:0072676	BP	GO:0072676	lymphocyte migration	1/32	111/18670	0.17385	0.274115	0.198669	APOD	1
GO:0001938	BP	GO:0001938	positive regulation of endothelial cell proliferation	1/32	112/18670	0.175274	0.274147	0.198691	ANG	1
GO:0010906	BP	GO:0010906	regulation of glucose metabolic process	1/32	112/18670	0.175274	0.274147	0.198691	IGFBP4	1
GO:0098693	BP	GO:0098693	regulation of synaptic vesicle cycle	1/32	112/18670	0.175274	0.274147	0.198691	STXBP5L	1
GO:1903510	BP	GO:1903510	mucopolysaccharide metabolic process	1/32	112/18670	0.175274	0.274147	0.198691	STAB2	1
GO:1903828	BP	GO:1903828	negative regulation of cellular protein localization	1/32	112/18670	0.175274	0.274147	0.198691	APOD	1
GO:0006096	BP	GO:0006096	glycolytic process	1/32	113/18670	0.176696	0.275567	0.199721	PKM	1
GO:0044282	BP	GO:0044282	small molecule catabolic process	2/32	445/18670	0.176747	0.275567	0.199721	PKM/STAB2	2
GO:0006757	BP	GO:0006757	ATP generation from ADP	1/32	114/18670	0.178116	0.277259	0.200947	PKM	1
GO:0030449	BP	GO:0030449	regulation of complement activation	1/32	115/18670	0.179533	0.278134	0.201581	A2M	1
GO:0032612	BP	GO:0032612	interleukin-1 production	1/32	115/18670	0.179533	0.278134	0.201581	IGHD	1
GO:0046660	BP	GO:0046660	female sex differentiation	1/32	115/18670	0.179533	0.278134	0.201581	ANG	1
GO:0006979	BP	GO:0006979	response to oxidative stress	2/32	451/18670	0.180441	0.278998	0.202207	APOD/MET	2
GO:0021782	BP	GO:0021782	glial cell development	1/32	116/18670	0.180948	0.278998	0.202207	GRN	1
GO:1900180	BP	GO:1900180	regulation of protein localization to nucleus	1/32	116/18670	0.180948	0.278998	0.202207	APOD	1
GO:0007613	BP	GO:0007613	memory	1/32	117/18670	0.182361	0.280732	0.203464	DBH	1
GO:0006911	BP	GO:0006911	phagocytosis, engulfment	1/32	118/18670	0.183771	0.282458	0.204715	IGHD	1
GO:0001952	BP	GO:0001952	regulation of cell-matrix adhesion	1/32	119/18670	0.185179	0.284174	0.205959	APOD	1
GO:0000184	BP	GO:0000184	nuclear-transcribed mRNA catabolic process, nonsense-mediated decay	1/32	120/18670	0.186585	0.284542	0.206225	HELZ2	1
GO:0003014	BP	GO:0003014	renal system process	1/32	120/18670	0.186585	0.284542	0.206225	JCHAIN	1
GO:0016079	BP	GO:0016079	synaptic vesicle exocytosis	1/32	120/18670	0.186585	0.284542	0.206225	STXBP5L	1
GO:0022612	BP	GO:0022612	gland morphogenesis	1/32	120/18670	0.186585	0.284542	0.206225	PHB2	1
GO:0002697	BP	GO:0002697	regulation of immune effector process	2/32	462/18670	0.187247	0.285106	0.206634	A2M/GRN	2
GO:0051346	BP	GO:0051346	negative regulation of hydrolase activity	2/32	463/18670	0.187867	0.285344	0.206807	A2M/CST6	2
GO:0030968	BP	GO:0030968	endoplasmic reticulum unfolded protein response	1/32	121/18670	0.187988	0.285344	0.206807	IGFBP1	1
GO:0019730	BP	GO:0019730	antimicrobial humoral response	1/32	122/18670	0.189389	0.286579	0.207702	JCHAIN	1
GO:0046031	BP	GO:0046031	ADP metabolic process	1/32	122/18670	0.189389	0.286579	0.207702	PKM	1
GO:0007098	BP	GO:0007098	centrosome cycle	1/32	124/18670	0.192183	0.290358	0.21044	CEP295	1
GO:0045471	BP	GO:0045471	response to ethanol	1/32	125/18670	0.193577	0.292011	0.211639	DBH	1
GO:0099024	BP	GO:0099024	plasma membrane invagination	1/32	127/18670	0.196358	0.295749	0.214348	IGHD	1
GO:0002576	BP	GO:0002576	platelet degranulation	1/32	128/18670	0.197745	0.297379	0.215529	A2M	1
GO:0006639	BP	GO:0006639	acylglycerol metabolic process	1/32	129/18670	0.199129	0.297627	0.215709	ANG	1
GO:0007043	BP	GO:0007043	cell-cell junction assembly	1/32	129/18670	0.199129	0.297627	0.215709	CDH5	1
GO:0044106	BP	GO:0044106	cellular amine metabolic process	1/32	129/18670	0.199129	0.297627	0.215709	DBH	1
GO:0050853	BP	GO:0050853	B cell receptor signaling pathway	1/32	129/18670	0.199129	0.297627	0.215709	IGHD	1
GO:0006638	BP	GO:0006638	neutral lipid metabolic process	1/32	130/18670	0.200512	0.298322	0.216213	ANG	1
GO:0030518	BP	GO:0030518	intracellular steroid hormone receptor signaling pathway	1/32	130/18670	0.200512	0.298322	0.216213	PHB2	1
GO:0042157	BP	GO:0042157	lipoprotein metabolic process	1/32	130/18670	0.200512	0.298322	0.216213	APOD	1
GO:0016049	BP	GO:0016049	cell growth	2/32	484/18670	0.20097	0.29855	0.216378	IGFBP4/IGFBP1	2
GO:0043312	BP	GO:0043312	neutrophil degranulation	2/32	485/18670	0.201597	0.299026	0.216723	PKM/GRN	2
GO:0006165	BP	GO:0006165	nucleoside diphosphate phosphorylation	1/32	132/18670	0.203269	0.299542	0.217097	PKM	1
GO:0031333	BP	GO:0031333	negative regulation of protein-containing complex assembly	1/32	132/18670	0.203269	0.299542	0.217097	CDH5	1
GO:0042476	BP	GO:0042476	odontogenesis	1/32	132/18670	0.203269	0.299542	0.217097	AMBN	1
GO:0046434	BP	GO:0046434	organophosphate catabolic process	1/32	132/18670	0.203269	0.299542	0.217097	ENPP2	1
GO:0002283	BP	GO:0002283	neutrophil activation involved in immune response	2/32	488/18670	0.20348	0.299542	0.217097	PKM/GRN	2
GO:0031023	BP	GO:0031023	microtubule organizing center organization	1/32	133/18670	0.204644	0.300109	0.217508	CEP295	1
GO:0002920	BP	GO:0002920	regulation of humoral immune response	1/32	134/18670	0.206017	0.300109	0.217508	A2M	1
GO:0009135	BP	GO:0009135	purine nucleoside diphosphate metabolic process	1/32	134/18670	0.206017	0.300109	0.217508	PKM	1
GO:0009179	BP	GO:0009179	purine ribonucleoside diphosphate metabolic process	1/32	134/18670	0.206017	0.300109	0.217508	PKM	1
GO:0032273	BP	GO:0032273	positive regulation of protein polymerization	1/32	134/18670	0.206017	0.300109	0.217508	MET	1
GO:0044409	BP	GO:0044409	entry into host	1/32	134/18670	0.206017	0.300109	0.217508	MET	1
GO:0046939	BP	GO:0046939	nucleotide phosphorylation	1/32	134/18670	0.206017	0.300109	0.217508	PKM	1
GO:0010324	BP	GO:0010324	membrane invagination	1/32	135/18670	0.207388	0.300759	0.217979	IGHD	1
GO:0030010	BP	GO:0030010	establishment of cell polarity	1/32	135/18670	0.207388	0.300759	0.217979	CDH5	1
GO:0050921	BP	GO:0050921	positive regulation of chemotaxis	1/32	135/18670	0.207388	0.300759	0.217979	MET	1
GO:0007292	BP	GO:0007292	female gamete generation	1/32	136/18670	0.208757	0.301545	0.218549	ANG	1
GO:0009185	BP	GO:0009185	ribonucleoside diphosphate metabolic process	1/32	136/18670	0.208757	0.301545	0.218549	PKM	1
GO:0042119	BP	GO:0042119	neutrophil activation	2/32	498/18670	0.209771	0.301545	0.218549	PKM/GRN	2
GO:0006958	BP	GO:0006958	complement activation, classical pathway	1/32	137/18670	0.210123	0.301545	0.218549	IGHD	1
GO:0010675	BP	GO:0010675	regulation of cellular carbohydrate metabolic process	1/32	137/18670	0.210123	0.301545	0.218549	IGFBP4	1
GO:1903670	BP	GO:1903670	regulation of sprouting angiogenesis	1/32	137/18670	0.210123	0.301545	0.218549	PKM	1
GO:0002446	BP	GO:0002446	neutrophil mediated immunity	2/32	499/18670	0.210402	0.301545	0.218549	PKM/GRN	2
GO:0031667	BP	GO:0031667	response to nutrient levels	2/32	499/18670	0.210402	0.301545	0.218549	PKM/FSTL1	2
GO:0009308	BP	GO:0009308	amine metabolic process	1/32	138/18670	0.211486	0.302655	0.219353	DBH	1
GO:0035304	BP	GO:0035304	regulation of protein dephosphorylation	1/32	139/18670	0.212848	0.30327	0.219799	CDH5	1
GO:0050715	BP	GO:0050715	positive regulation of cytokine secretion	1/32	139/18670	0.212848	0.30327	0.219799	IGHD	1
GO:0051588	BP	GO:0051588	regulation of neurotransmitter transport	1/32	139/18670	0.212848	0.30327	0.219799	STXBP5L	1
GO:0034620	BP	GO:0034620	cellular response to unfolded protein	1/32	140/18670	0.214207	0.303876	0.220238	IGFBP1	1
GO:0035023	BP	GO:0035023	regulation of Rho protein signal transduction	1/32	140/18670	0.214207	0.303876	0.220238	MET	1
GO:0042737	BP	GO:0042737	drug catabolic process	1/32	140/18670	0.214207	0.303876	0.220238	DBH	1
GO:0008286	BP	GO:0008286	insulin receptor signaling pathway	1/32	141/18670	0.215564	0.304768	0.220885	IGFBP1	1
GO:0007030	BP	GO:0007030	Golgi organization	1/32	142/18670	0.216919	0.304768	0.220885	LMAN2	1
GO:0008277	BP	GO:0008277	regulation of G protein-coupled receptor signaling pathway	1/32	142/18670	0.216919	0.304768	0.220885	MET	1
GO:0050871	BP	GO:0050871	positive regulation of B cell activation	1/32	142/18670	0.216919	0.304768	0.220885	IGHD	1
GO:0072006	BP	GO:0072006	nephron development	1/32	142/18670	0.216919	0.304768	0.220885	ENPEP	1
GO:0007034	BP	GO:0007034	vacuolar transport	1/32	143/18670	0.218272	0.304768	0.220885	GRN	1
GO:0030879	BP	GO:0030879	mammary gland development	1/32	143/18670	0.218272	0.304768	0.220885	PHB2	1
GO:0035296	BP	GO:0035296	regulation of tube diameter	1/32	143/18670	0.218272	0.304768	0.220885	DBH	1
GO:0097746	BP	GO:0097746	regulation of blood vessel diameter	1/32	143/18670	0.218272	0.304768	0.220885	DBH	1
GO:0106106	BP	GO:0106106	cold-induced thermogenesis	1/32	143/18670	0.218272	0.304768	0.220885	DBH	1
GO:0120161	BP	GO:0120161	regulation of cold-induced thermogenesis	1/32	143/18670	0.218272	0.304768	0.220885	DBH	1
GO:0030534	BP	GO:0030534	adult behavior	1/32	144/18670	0.219622	0.305779	0.221617	DBH	1
GO:0035150	BP	GO:0035150	regulation of tube size	1/32	144/18670	0.219622	0.305779	0.221617	DBH	1
GO:0007612	BP	GO:0007612	learning	1/32	145/18670	0.22097	0.307217	0.22266	DBH	1
GO:0042542	BP	GO:0042542	response to hydrogen peroxide	1/32	146/18670	0.222315	0.308648	0.223697	MET	1
GO:0043524	BP	GO:0043524	negative regulation of neuron apoptotic process	1/32	147/18670	0.223659	0.309633	0.22441	GRN	1
GO:0071236	BP	GO:0071236	cellular response to antibiotic	1/32	147/18670	0.223659	0.309633	0.22441	MET	1
GO:0051592	BP	GO:0051592	response to calcium ion	1/32	148/18670	0.225	0.311048	0.225436	SYT13	1
GO:0002455	BP	GO:0002455	humoral immune response mediated by circulating immunoglobulin	1/32	150/18670	0.227676	0.313858	0.227473	IGHD	1
GO:0006090	BP	GO:0006090	pyruvate metabolic process	1/32	150/18670	0.227676	0.313858	0.227473	PKM	1
GO:0055088	BP	GO:0055088	lipid homeostasis	1/32	151/18670	0.22901	0.315252	0.228483	APOC4	1
GO:0001890	BP	GO:0001890	placenta development	1/32	152/18670	0.230342	0.31664	0.229489	ANG	1
GO:0042133	BP	GO:0042133	neurotransmitter metabolic process	1/32	153/18670	0.231672	0.317128	0.229843	DBH	1
GO:0050729	BP	GO:0050729	positive regulation of inflammatory response	1/32	153/18670	0.231672	0.317128	0.229843	GRN	1
GO:0051017	BP	GO:0051017	actin filament bundle assembly	1/32	153/18670	0.231672	0.317128	0.229843	MET	1
GO:0009132	BP	GO:0009132	nucleoside diphosphate metabolic process	1/32	154/18670	0.233	0.317609	0.230191	PKM	1
GO:0055067	BP	GO:0055067	monovalent inorganic cation homeostasis	1/32	154/18670	0.233	0.317609	0.230191	GRN	1
GO:1990845	BP	GO:1990845	adaptive thermogenesis	1/32	154/18670	0.233	0.317609	0.230191	DBH	1
GO:2001236	BP	GO:2001236	regulation of extrinsic apoptotic signaling pathway	1/32	155/18670	0.234326	0.318971	0.231178	DBH	1
GO:0030856	BP	GO:0030856	regulation of epithelial cell differentiation	1/32	156/18670	0.235649	0.31988	0.231837	CDH5	1
GO:1905952	BP	GO:1905952	regulation of lipid localization	1/32	156/18670	0.235649	0.31988	0.231837	APOC4	1
GO:0043467	BP	GO:0043467	regulation of generation of precursor metabolites and energy	1/32	157/18670	0.23697	0.320781	0.23249	PHB2	1
GO:0061572	BP	GO:0061572	actin filament bundle organization	1/32	157/18670	0.23697	0.320781	0.23249	MET	1
GO:0052126	BP	GO:0052126	movement in host environment	1/32	158/18670	0.238289	0.322119	0.23346	MET	1
GO:0030203	BP	GO:0030203	glycosaminoglycan metabolic process	1/32	160/18670	0.24092	0.325226	0.235711	STAB2	1
GO:0035967	BP	GO:0035967	cellular response to topologically incorrect protein	1/32	161/18670	0.242233	0.326546	0.236668	IGFBP1	1
GO:0007033	BP	GO:0007033	vacuole organization	1/32	163/18670	0.244851	0.327811	0.237585	GRN	1
GO:0031214	BP	GO:0031214	biomineral tissue development	1/32	163/18670	0.244851	0.327811	0.237585	AMBN	1
GO:0045931	BP	GO:0045931	positive regulation of mitotic cell cycle	1/32	163/18670	0.244851	0.327811	0.237585	PHB2	1
GO:0110148	BP	GO:0110148	biomineralization	1/32	163/18670	0.244851	0.327811	0.237585	AMBN	1
GO:1902600	BP	GO:1902600	proton transmembrane transport	1/32	163/18670	0.244851	0.327811	0.237585	PHB2	1
GO:0007088	BP	GO:0007088	regulation of mitotic nuclear division	1/32	164/18670	0.246156	0.329108	0.238525	PHB2	1
GO:0050680	BP	GO:0050680	negative regulation of epithelial cell proliferation	1/32	165/18670	0.24746	0.330398	0.23946	PHB2	1
GO:0034614	BP	GO:0034614	cellular response to reactive oxygen species	1/32	168/18670	0.251357	0.335143	0.242899	MET	1
GO:0030307	BP	GO:0030307	positive regulation of cell growth	1/32	169/18670	0.252652	0.33584	0.243404	IGFBP1	1
GO:0051100	BP	GO:0051100	negative regulation of binding	1/32	169/18670	0.252652	0.33584	0.243404	MET	1
GO:0006022	BP	GO:0006022	aminoglycan metabolic process	1/32	170/18670	0.253945	0.33584	0.243404	STAB2	1
GO:0007269	BP	GO:0007269	neurotransmitter secretion	1/32	170/18670	0.253945	0.33584	0.243404	STXBP5L	1
GO:0043433	BP	GO:0043433	negative regulation of DNA-binding transcription factor activity	1/32	170/18670	0.253945	0.33584	0.243404	PHB2	1
GO:0099643	BP	GO:0099643	signal release from synapse	1/32	170/18670	0.253945	0.33584	0.243404	STXBP5L	1
GO:0009152	BP	GO:0009152	purine ribonucleotide biosynthetic process	1/32	172/18670	0.256524	0.338334	0.245212	PKM	1
GO:0051262	BP	GO:0051262	protein tetramerization	1/32	172/18670	0.256524	0.338334	0.245212	PKM	1
GO:0001659	BP	GO:0001659	temperature homeostasis	1/32	173/18670	0.25781	0.339571	0.246109	DBH	1
GO:0002695	BP	GO:0002695	negative regulation of leukocyte activation	1/32	175/18670	0.260376	0.341868	0.247773	GRN	1
GO:0046165	BP	GO:0046165	alcohol biosynthetic process	1/32	175/18670	0.260376	0.341868	0.247773	DBH	1
GO:0001936	BP	GO:0001936	regulation of endothelial cell proliferation	1/32	176/18670	0.261655	0.341868	0.247773	ANG	1
GO:0006986	BP	GO:0006986	response to unfolded protein	1/32	176/18670	0.261655	0.341868	0.247773	IGFBP1	1
GO:0050796	BP	GO:0050796	regulation of insulin secretion	1/32	176/18670	0.261655	0.341868	0.247773	STXBP5L	1
GO:0051897	BP	GO:0051897	positive regulation of protein kinase B signaling	1/32	176/18670	0.261655	0.341868	0.247773	MET	1
GO:0048469	BP	GO:0048469	cell maturation	1/32	177/18670	0.262933	0.343078	0.24865	ANG	1
GO:0048771	BP	GO:0048771	tissue remodeling	1/32	179/18670	0.265481	0.34502	0.250058	DBH	1
GO:0051099	BP	GO:0051099	positive regulation of binding	1/32	179/18670	0.265481	0.34502	0.250058	MET	1
GO:1903034	BP	GO:1903034	regulation of response to wounding	1/32	179/18670	0.265481	0.34502	0.250058	GRN	1
GO:1905330	BP	GO:1905330	regulation of morphogenesis of an epithelium	1/32	180/18670	0.266753	0.346211	0.250921	PHB2	1
GO:0008217	BP	GO:0008217	regulation of blood pressure	1/32	182/18670	0.269288	0.348113	0.2523	ENPEP	1
GO:0030041	BP	GO:0030041	actin filament polymerization	1/32	182/18670	0.269288	0.348113	0.2523	ANG	1
GO:0043401	BP	GO:0043401	steroid hormone mediated signaling pathway	1/32	182/18670	0.269288	0.348113	0.2523	PHB2	1
GO:0002040	BP	GO:0002040	sprouting angiogenesis	1/32	183/18670	0.270553	0.349286	0.253149	PKM	1
GO:0050864	BP	GO:0050864	regulation of B cell activation	1/32	184/18670	0.271816	0.350452	0.253995	IGHD	1
GO:0009260	BP	GO:0009260	ribonucleotide biosynthetic process	1/32	185/18670	0.273076	0.351613	0.254836	PKM	1
GO:0051783	BP	GO:0051783	regulation of nuclear division	1/32	188/18670	0.276845	0.355528	0.257673	PHB2	1
GO:0071248	BP	GO:0071248	cellular response to metal ion	1/32	188/18670	0.276845	0.355528	0.257673	SYT13	1
GO:0000819	BP	GO:0000819	sister chromatid segregation	1/32	189/18670	0.278097	0.356666	0.258498	PHB2	1
GO:0001935	BP	GO:0001935	endothelial cell proliferation	1/32	191/18670	0.280595	0.358173	0.25959	ANG	1
GO:0042594	BP	GO:0042594	response to starvation	1/32	191/18670	0.280595	0.358173	0.25959	FSTL1	1
GO:0006164	BP	GO:0006164	purine nucleotide biosynthetic process	1/32	192/18670	0.281841	0.358173	0.25959	PKM	1
GO:0046390	BP	GO:0046390	ribose phosphate biosynthetic process	1/32	192/18670	0.281841	0.358173	0.25959	PKM	1
GO:0050731	BP	GO:0050731	positive regulation of peptidyl-tyrosine phosphorylation	1/32	192/18670	0.281841	0.358173	0.25959	ENPP2	1
GO:1901136	BP	GO:1901136	carbohydrate derivative catabolic process	1/32	192/18670	0.281841	0.358173	0.25959	STAB2	1
GO:1901888	BP	GO:1901888	regulation of cell junction assembly	1/32	192/18670	0.281841	0.358173	0.25959	APOD	1
GO:0099504	BP	GO:0099504	synaptic vesicle cycle	1/32	193/18670	0.283085	0.359286	0.260397	STXBP5L	1
GO:1902115	BP	GO:1902115	regulation of organelle assembly	1/32	194/18670	0.284326	0.360393	0.261199	CEP295	1
GO:0002685	BP	GO:0002685	regulation of leukocyte migration	1/32	196/18670	0.286803	0.363061	0.263133	APOD	1
GO:0010952	BP	GO:0010952	positive regulation of peptidase activity	1/32	197/18670	0.288039	0.363968	0.26379	GRN	1
GO:0007626	BP	GO:0007626	locomotory behavior	1/32	198/18670	0.289272	0.363968	0.26379	DBH	1
GO:0016052	BP	GO:0016052	carbohydrate catabolic process	1/32	198/18670	0.289272	0.363968	0.26379	PKM	1
GO:0006109	BP	GO:0006109	regulation of carbohydrate metabolic process	1/32	199/18670	0.290503	0.363968	0.26379	IGFBP4	1
GO:0007179	BP	GO:0007179	transforming growth factor beta receptor signaling pathway	1/32	199/18670	0.290503	0.363968	0.26379	CDH5	1
GO:0031032	BP	GO:0031032	actomyosin structure organization	1/32	199/18670	0.290503	0.363968	0.26379	MET	1
GO:0035966	BP	GO:0035966	response to topologically incorrect protein	1/32	199/18670	0.290503	0.363968	0.26379	IGFBP1	1
GO:0050866	BP	GO:0050866	negative regulation of cell activation	1/32	199/18670	0.290503	0.363968	0.26379	GRN	1
GO:0051701	BP	GO:0051701	interaction with host	1/32	202/18670	0.294184	0.367636	0.266449	MET	1
GO:1902806	BP	GO:1902806	regulation of cell cycle G1/S phase transition	1/32	202/18670	0.294184	0.367636	0.266449	PHB2	1
GO:0007266	BP	GO:0007266	Rho protein signal transduction	1/32	203/18670	0.295407	0.368693	0.267215	MET	1
GO:0006473	BP	GO:0006473	protein acetylation	1/32	204/18670	0.296628	0.369272	0.267635	CEP295	1
GO:1902905	BP	GO:1902905	positive regulation of supramolecular fiber organization	1/32	204/18670	0.296628	0.369272	0.267635	MET	1
GO:0015893	BP	GO:0015893	drug transport	1/32	205/18670	0.297847	0.369846	0.268051	SYT13	1
GO:0072522	BP	GO:0072522	purine-containing compound biosynthetic process	1/32	205/18670	0.297847	0.369846	0.268051	PKM	1
GO:0000956	BP	GO:0000956	nuclear-transcribed mRNA catabolic process	1/32	207/18670	0.300279	0.371153	0.268998	HELZ2	1
GO:0030073	BP	GO:0030073	insulin secretion	1/32	207/18670	0.300279	0.371153	0.268998	STXBP5L	1
GO:0071456	BP	GO:0071456	cellular response to hypoxia	1/32	207/18670	0.300279	0.371153	0.268998	PHB2	1
GO:0016051	BP	GO:0016051	carbohydrate biosynthetic process	1/32	208/18670	0.301492	0.371153	0.268998	TKT	1
GO:0090276	BP	GO:0090276	regulation of peptide hormone secretion	1/32	208/18670	0.301492	0.371153	0.268998	STXBP5L	1
GO:1901215	BP	GO:1901215	negative regulation of neuron death	1/32	208/18670	0.301492	0.371153	0.268998	GRN	1
GO:0008154	BP	GO:0008154	actin polymerization or depolymerization	1/32	209/18670	0.302702	0.371153	0.268998	ANG	1
GO:0017148	BP	GO:0017148	negative regulation of translation	1/32	209/18670	0.302702	0.371153	0.268998	ANG	1
GO:0035303	BP	GO:0035303	regulation of dephosphorylation	1/32	209/18670	0.302702	0.371153	0.268998	CDH5	1
GO:0071229	BP	GO:0071229	cellular response to acid chemical	1/32	209/18670	0.302702	0.371153	0.268998	PHB2	1
GO:0007163	BP	GO:0007163	establishment or maintenance of cell polarity	1/32	210/18670	0.303911	0.371701	0.269395	CDH5	1
GO:0043523	BP	GO:0043523	regulation of neuron apoptotic process	1/32	210/18670	0.303911	0.371701	0.269395	GRN	1
GO:0006888	BP	GO:0006888	endoplasmic reticulum to Golgi vesicle-mediated transport	1/32	212/18670	0.306322	0.374181	0.271192	LMAN2	1
GO:0099003	BP	GO:0099003	vesicle-mediated transport in synapse	1/32	213/18670	0.307525	0.37518	0.271917	STXBP5L	1
GO:0008037	BP	GO:0008037	cell recognition	1/32	215/18670	0.309924	0.376226	0.272675	IGHD	1
GO:0010810	BP	GO:0010810	regulation of cell-substrate adhesion	1/32	215/18670	0.309924	0.376226	0.272675	APOD	1
GO:0070374	BP	GO:0070374	positive regulation of ERK1 and ERK2 cascade	1/32	215/18670	0.309924	0.376226	0.272675	PHB2	1
GO:0071241	BP	GO:0071241	cellular response to inorganic substance	1/32	215/18670	0.309924	0.376226	0.272675	SYT13	1
GO:0008406	BP	GO:0008406	gonad development	1/32	217/18670	0.312315	0.376321	0.272743	ANG	1
GO:0016485	BP	GO:0016485	protein processing	1/32	217/18670	0.312315	0.376321	0.272743	ENPEP	1
GO:0036294	BP	GO:0036294	cellular response to decreased oxygen levels	1/32	217/18670	0.312315	0.376321	0.272743	PHB2	1
GO:0043393	BP	GO:0043393	regulation of protein binding	1/32	217/18670	0.312315	0.376321	0.272743	MET	1
GO:0044242	BP	GO:0044242	cellular lipid catabolic process	1/32	217/18670	0.312315	0.376321	0.272743	ENPP2	1
GO:0050920	BP	GO:0050920	regulation of chemotaxis	1/32	217/18670	0.312315	0.376321	0.272743	MET	1
GO:0010001	BP	GO:0010001	glial cell differentiation	1/32	218/18670	0.313508	0.376827	0.27311	GRN	1
GO:0016064	BP	GO:0016064	immunoglobulin mediated immune response	1/32	218/18670	0.313508	0.376827	0.27311	IGHD	1
GO:0007584	BP	GO:0007584	response to nutrient	1/32	219/18670	0.314698	0.377793	0.27381	PKM	1
GO:0019724	BP	GO:0019724	B cell mediated immunity	1/32	221/18670	0.317073	0.380176	0.275538	IGHD	1
GO:0045137	BP	GO:0045137	development of primary sexual characteristics	1/32	223/18670	0.31944	0.382545	0.277254	ANG	1
GO:0097191	BP	GO:0097191	extrinsic apoptotic signaling pathway	1/32	224/18670	0.320621	0.383488	0.277938	DBH	1
GO:0034249	BP	GO:0034249	negative regulation of cellular amide metabolic process	1/32	226/18670	0.322976	0.385832	0.279637	ANG	1
GO:0006457	BP	GO:0006457	protein folding	1/32	227/18670	0.324151	0.386762	0.280311	GRN	1
GO:0001894	BP	GO:0001894	tissue homeostasis	1/32	229/18670	0.326494	0.389082	0.281992	JCHAIN	1
GO:0009755	BP	GO:0009755	hormone-mediated signaling pathway	1/32	233/18670	0.331157	0.393199	0.284976	PHB2	1
GO:0042445	BP	GO:0042445	hormone metabolic process	1/32	233/18670	0.331157	0.393199	0.284976	ENPEP	1
GO:0097305	BP	GO:0097305	response to alcohol	1/32	233/18670	0.331157	0.393199	0.284976	DBH	1
GO:0071453	BP	GO:0071453	cellular response to oxygen levels	1/32	234/18670	0.332318	0.394098	0.285627	PHB2	1
GO:0072330	BP	GO:0072330	monocarboxylic acid biosynthetic process	1/32	237/18670	0.335789	0.397731	0.28826	PKM	1
GO:0030258	BP	GO:0030258	lipid modification	1/32	238/18670	0.336942	0.39813	0.28855	APOD	1
GO:0046578	BP	GO:0046578	regulation of Ras protein signal transduction	1/32	238/18670	0.336942	0.39813	0.28855	MET	1
GO:0051402	BP	GO:0051402	neuron apoptotic process	1/32	239/18670	0.338093	0.399007	0.289186	GRN	1
GO:0051896	BP	GO:0051896	regulation of protein kinase B signaling	1/32	244/18670	0.34382	0.405276	0.293729	MET	1
GO:0097237	BP	GO:0097237	cellular response to toxic substance	1/32	247/18670	0.347233	0.408805	0.296287	MET	1
GO:0043543	BP	GO:0043543	protein acylation	1/32	248/18670	0.348367	0.409153	0.296539	CEP295	1
GO:0071383	BP	GO:0071383	cellular response to steroid hormone stimulus	1/32	248/18670	0.348367	0.409153	0.296539	PHB2	1
GO:0002833	BP	GO:0002833	positive regulation of response to biotic stimulus	1/32	249/18670	0.349499	0.409497	0.296788	GRN	1
GO:0071560	BP	GO:0071560	cellular response to transforming growth factor beta stimulus	1/32	249/18670	0.349499	0.409497	0.296788	CDH5	1
GO:0030072	BP	GO:0030072	peptide hormone secretion	1/32	250/18670	0.350629	0.409837	0.297034	STXBP5L	1
GO:0033157	BP	GO:0033157	regulation of intracellular protein transport	1/32	250/18670	0.350629	0.409837	0.297034	APOD	1
GO:0045017	BP	GO:0045017	glycerolipid biosynthetic process	1/32	251/18670	0.351757	0.410663	0.297634	ANG	1
GO:0031330	BP	GO:0031330	negative regulation of cellular catabolic process	1/32	253/18670	0.354007	0.412305	0.298823	MET	1
GO:2000027	BP	GO:2000027	regulation of animal organ morphogenesis	1/32	253/18670	0.354007	0.412305	0.298823	PHB2	1
GO:0071559	BP	GO:0071559	response to transforming growth factor beta	1/32	255/18670	0.35625	0.414422	0.300358	CDH5	1
GO:0007611	BP	GO:0007611	learning or memory	1/32	256/18670	0.357369	0.414735	0.300584	DBH	1
GO:0050730	BP	GO:0050730	regulation of peptidyl-tyrosine phosphorylation	1/32	256/18670	0.357369	0.414735	0.300584	ENPP2	1
GO:0048863	BP	GO:0048863	stem cell differentiation	1/32	257/18670	0.358486	0.415537	0.301166	A2M	1
GO:0032412	BP	GO:0032412	regulation of ion transmembrane transporter activity	1/32	260/18670	0.361825	0.418498	0.303311	PHB2	1
GO:0051091	BP	GO:0051091	positive regulation of DNA-binding transcription factor activity	1/32	261/18670	0.362934	0.418498	0.303311	PHB2	1
GO:0110053	BP	GO:0110053	regulation of actin filament organization	1/32	261/18670	0.362934	0.418498	0.303311	MET	1
GO:0007281	BP	GO:0007281	germ cell development	1/32	262/18670	0.364041	0.418498	0.303311	ANG	1
GO:0015850	BP	GO:0015850	organic hydroxy compound transport	1/32	262/18670	0.364041	0.418498	0.303311	SYT13	1
GO:0046883	BP	GO:0046883	regulation of hormone secretion	1/32	262/18670	0.364041	0.418498	0.303311	STXBP5L	1
GO:0098813	BP	GO:0098813	nuclear chromosome segregation	1/32	262/18670	0.364041	0.418498	0.303311	PHB2	1
GO:0140014	BP	GO:0140014	mitotic nuclear division	1/32	264/18670	0.366251	0.420542	0.304793	PHB2	1
GO:1901617	BP	GO:1901617	organic hydroxy compound biosynthetic process	1/32	266/18670	0.368452	0.422573	0.306265	DBH	1
GO:0022898	BP	GO:0022898	regulation of transmembrane transporter activity	1/32	268/18670	0.370647	0.424591	0.307728	PHB2	1
GO:0043491	BP	GO:0043491	protein kinase B signaling	1/32	269/18670	0.371741	0.4251	0.308097	MET	1
GO:0006836	BP	GO:0006836	neurotransmitter transport	1/32	270/18670	0.372834	0.4251	0.308097	STXBP5L	1
GO:0007548	BP	GO:0007548	sex differentiation	1/32	270/18670	0.372834	0.4251	0.308097	ANG	1
GO:0045927	BP	GO:0045927	positive regulation of growth	1/32	270/18670	0.372834	0.4251	0.308097	IGFBP1	1
GO:0016054	BP	GO:0016054	organic acid catabolic process	1/32	275/18670	0.378269	0.430292	0.31186	STAB2	1
GO:0046395	BP	GO:0046395	carboxylic acid catabolic process	1/32	275/18670	0.378269	0.430292	0.31186	STAB2	1
GO:0001822	BP	GO:0001822	kidney development	1/32	278/18670	0.381508	0.432465	0.313434	ENPEP	1
GO:0009165	BP	GO:0009165	nucleotide biosynthetic process	1/32	278/18670	0.381508	0.432465	0.313434	PKM	1
GO:0030522	BP	GO:0030522	intracellular receptor signaling pathway	1/32	278/18670	0.381508	0.432465	0.313434	PHB2	1
GO:0010976	BP	GO:0010976	positive regulation of neuron projection development	1/32	281/18670	0.384731	0.435612	0.315715	GRN	1
GO:0044262	BP	GO:0044262	cellular carbohydrate metabolic process	1/32	282/18670	0.385802	0.435813	0.315861	IGFBP4	1
GO:1901293	BP	GO:1901293	nucleoside phosphate biosynthetic process	1/32	282/18670	0.385802	0.435813	0.315861	PKM	1
GO:0032409	BP	GO:0032409	regulation of transporter activity	1/32	283/18670	0.386871	0.436515	0.31637	PHB2	1
GO:0034976	BP	GO:0034976	response to endoplasmic reticulum stress	1/32	285/18670	0.389003	0.437909	0.31738	IGFBP1	1
GO:0051604	BP	GO:0051604	protein maturation	1/32	285/18670	0.389003	0.437909	0.31738	ENPEP	1
GO:0007162	BP	GO:0007162	negative regulation of cell adhesion	1/32	289/18670	0.393246	0.442175	0.320472	APOD	1
GO:0042063	BP	GO:0042063	gliogenesis	1/32	290/18670	0.394302	0.442853	0.320963	GRN	1
GO:0009410	BP	GO:0009410	response to xenobiotic stimulus	1/32	292/18670	0.39641	0.444708	0.322308	DBH	1
GO:0072001	BP	GO:0072001	renal system development	1/32	293/18670	0.397461	0.445375	0.322791	ENPEP	1
GO:0050890	BP	GO:0050890	cognition	1/32	296/18670	0.400603	0.448381	0.32497	DBH	1
GO:1903522	BP	GO:1903522	regulation of blood circulation	1/32	297/18670	0.401647	0.449035	0.325444	DBH	1
GO:0044843	BP	GO:0044843	cell cycle G1/S phase transition	1/32	298/18670	0.402689	0.449685	0.325915	PHB2	1
GO:0070372	BP	GO:0070372	regulation of ERK1 and ERK2 cascade	1/32	300/18670	0.404768	0.45149	0.327223	PHB2	1
GO:0034599	BP	GO:0034599	cellular response to oxidative stress	1/32	302/18670	0.40684	0.453283	0.328523	MET	1
GO:0046034	BP	GO:0046034	ATP metabolic process	1/32	304/18670	0.408905	0.454546	0.329438	PKM	1
GO:0060326	BP	GO:0060326	cell chemotaxis	1/32	304/18670	0.408905	0.454546	0.329438	MET	1
GO:0009895	BP	GO:0009895	negative regulation of catabolic process	1/32	308/18670	0.413014	0.45807	0.331992	MET	1
GO:0046879	BP	GO:0046879	hormone secretion	1/32	308/18670	0.413014	0.45807	0.331992	STXBP5L	1
GO:0042113	BP	GO:0042113	B cell activation	1/32	310/18670	0.415058	0.459815	0.333257	IGHD	1
GO:1901214	BP	GO:1901214	regulation of neuron death	1/32	313/18670	0.418112	0.462673	0.335328	GRN	1
GO:0009416	BP	GO:0009416	response to light stimulus	1/32	314/18670	0.419126	0.46327	0.335761	DBH	1
GO:0051235	BP	GO:0051235	maintenance of location	1/32	315/18670	0.420139	0.463864	0.336191	APOC4	1
GO:0050851	BP	GO:0050851	antigen receptor-mediated signaling pathway	1/32	316/18670	0.42115	0.464454	0.336619	IGHD	1
GO:0009914	BP	GO:0009914	hormone transport	1/32	317/18670	0.422159	0.464518	0.336665	STXBP5L	1
GO:0070371	BP	GO:0070371	ERK1 and ERK2 cascade	1/32	317/18670	0.422159	0.464518	0.336665	PHB2	1
GO:0006650	BP	GO:0006650	glycerophospholipid metabolic process	1/32	319/18670	0.424172	0.465683	0.33751	ENPP2	1
GO:0070588	BP	GO:0070588	calcium ion transmembrane transport	1/32	319/18670	0.424172	0.465683	0.33751	PHB2	1
GO:0006470	BP	GO:0006470	protein dephosphorylation	1/32	321/18670	0.426179	0.466836	0.338345	CDH5	1
GO:0007059	BP	GO:0007059	chromosome segregation	1/32	321/18670	0.426179	0.466836	0.338345	PHB2	1
GO:0010506	BP	GO:0010506	regulation of autophagy	1/32	328/18670	0.433148	0.473938	0.343493	MET	1
GO:0001655	BP	GO:0001655	urogenital system development	1/32	330/18670	0.435125	0.475567	0.344674	ENPEP	1
GO:0016042	BP	GO:0016042	lipid catabolic process	1/32	333/18670	0.438077	0.477724	0.346236	ENPP2	1
GO:0032147	BP	GO:0032147	activation of protein kinase activity	1/32	333/18670	0.438077	0.477724	0.346236	ANG	1
GO:0030336	BP	GO:0030336	negative regulation of cell migration	1/32	334/18670	0.439057	0.477725	0.346238	APOD	1
GO:0051251	BP	GO:0051251	positive regulation of lymphocyte activation	1/32	334/18670	0.439057	0.477725	0.346238	IGHD	1
GO:0007596	BP	GO:0007596	blood coagulation	1/32	336/18670	0.441013	0.47932	0.347393	A2M	1
GO:0007599	BP	GO:0007599	hemostasis	1/32	341/18670	0.445875	0.483475	0.350404	A2M	1
GO:0050817	BP	GO:0050817	coagulation	1/32	342/18670	0.446843	0.483475	0.350404	A2M	1
GO:1904062	BP	GO:1904062	regulation of cation transmembrane transport	1/32	342/18670	0.446843	0.483475	0.350404	PHB2	1
GO:0001101	BP	GO:0001101	response to acid chemical	1/32	343/18670	0.447808	0.483475	0.350404	PHB2	1
GO:0002237	BP	GO:0002237	response to molecule of bacterial origin	1/32	343/18670	0.447808	0.483475	0.350404	SSC5D	1
GO:0032956	BP	GO:0032956	regulation of actin cytoskeleton organization	1/32	343/18670	0.447808	0.483475	0.350404	MET	1
GO:0070997	BP	GO:0070997	neuron death	1/32	348/18670	0.452613	0.488122	0.353772	GRN	1
GO:2000146	BP	GO:2000146	negative regulation of cell motility	1/32	349/18670	0.453569	0.488613	0.354128	APOD	1
GO:0062197	BP	GO:0062197	cellular response to chemical stress	1/32	350/18670	0.454523	0.489101	0.354482	MET	1
GO:0051260	BP	GO:0051260	protein homooligomerization	1/32	351/18670	0.455476	0.489587	0.354834	PKM	1
GO:0002449	BP	GO:0002449	lymphocyte mediated immunity	1/32	352/18670	0.456427	0.490069	0.355184	IGHD	1
GO:0046394	BP	GO:0046394	carboxylic acid biosynthetic process	1/32	355/18670	0.459271	0.492581	0.357004	PKM	1
GO:0016053	BP	GO:0016053	organic acid biosynthetic process	1/32	356/18670	0.460216	0.493052	0.357346	PKM	1
GO:0045862	BP	GO:0045862	positive regulation of proteolysis	1/32	358/18670	0.462101	0.494529	0.358416	GRN	1
GO:0002460	BP	GO:0002460	adaptive immune response based on somatic recombination of immune receptors built from immunoglobulin superfamily domains	1/32	361/18670	0.464916	0.496453	0.359811	IGHD	1
GO:0022412	BP	GO:0022412	cellular process involved in reproduction in multicellular organism	1/32	361/18670	0.464916	0.496453	0.359811	ANG	1
GO:0010038	BP	GO:0010038	response to metal ion	1/32	362/18670	0.465851	0.496908	0.36014	SYT13	1
GO:0006402	BP	GO:0006402	mRNA catabolic process	1/32	364/18670	0.467717	0.498353	0.361188	HELZ2	1
GO:0030198	BP	GO:0030198	extracellular matrix organization	1/32	368/18670	0.471429	0.501214	0.363262	A2M	1
GO:0048193	BP	GO:0048193	Golgi vesicle transport	1/32	368/18670	0.471429	0.501214	0.363262	LMAN2	1
GO:0043062	BP	GO:0043062	extracellular structure organization	1/32	369/18670	0.472353	0.501539	0.363497	A2M	1
GO:0006066	BP	GO:0006066	alcohol metabolic process	1/32	370/18670	0.473276	0.501539	0.363497	DBH	1
GO:0032386	BP	GO:0032386	regulation of intracellular transport	1/32	370/18670	0.473276	0.501539	0.363497	APOD	1
GO:0045666	BP	GO:0045666	positive regulation of neuron differentiation	1/32	371/18670	0.474197	0.50197	0.363809	GRN	1
GO:0051098	BP	GO:0051098	regulation of binding	1/32	373/18670	0.476034	0.503369	0.364823	MET	1
GO:0002696	BP	GO:0002696	positive regulation of leukocyte activation	1/32	380/18670	0.482417	0.509565	0.369314	IGHD	1
GO:0040013	BP	GO:0040013	negative regulation of locomotion	1/32	381/18670	0.483322	0.50997	0.369607	APOD	1
GO:0048545	BP	GO:0048545	response to steroid hormone	1/32	383/18670	0.485129	0.511169	0.370476	PHB2	1
GO:0031349	BP	GO:0031349	positive regulation of defense response	1/32	384/18670	0.48603	0.511169	0.370476	GRN	1
GO:0051271	BP	GO:0051271	negative regulation of cellular component movement	1/32	384/18670	0.48603	0.511169	0.370476	APOD	1
GO:0032970	BP	GO:0032970	regulation of actin filament-based process	1/32	388/18670	0.489618	0.514389	0.37281	MET	1
GO:0050867	BP	GO:0050867	positive regulation of cell activation	1/32	394/18670	0.494956	0.519437	0.376469	IGHD	1
GO:0006401	BP	GO:0006401	RNA catabolic process	1/32	397/18670	0.497604	0.521656	0.378077	HELZ2	1
GO:0009150	BP	GO:0009150	purine ribonucleotide metabolic process	1/32	399/18670	0.499362	0.522937	0.379005	PKM	1
GO:0043547	BP	GO:0043547	positive regulation of GTPase activity	1/32	405/18670	0.504601	0.527857	0.382571	STXBP5L	1
GO:2001233	BP	GO:2001233	regulation of apoptotic signaling pathway	1/32	406/18670	0.505469	0.528199	0.382819	DBH	1
GO:0000280	BP	GO:0000280	nuclear division	1/32	407/18670	0.506335	0.528538	0.383065	PHB2	1
GO:0009259	BP	GO:0009259	ribonucleotide metabolic process	1/32	414/18670	0.512359	0.534255	0.387208	PKM	1
GO:0043588	BP	GO:0043588	skin development	1/32	419/18670	0.516619	0.538121	0.39001	MET	1
GO:0006417	BP	GO:0006417	regulation of translation	1/32	424/18670	0.520842	0.541365	0.392361	ANG	1
GO:0019693	BP	GO:0019693	ribose phosphate metabolic process	1/32	424/18670	0.520842	0.541365	0.392361	PKM	1
GO:0062012	BP	GO:0062012	regulation of small molecule metabolic process	1/32	429/18670	0.525029	0.545137	0.395095	IGFBP4	1
GO:0006644	BP	GO:0006644	phospholipid metabolic process	1/32	430/18670	0.525863	0.545387	0.395276	ENPP2	1
GO:0048608	BP	GO:0048608	reproductive structure development	1/32	431/18670	0.526694	0.545387	0.395276	ANG	1
GO:0006163	BP	GO:0006163	purine nucleotide metabolic process	1/32	432/18670	0.527525	0.545387	0.395276	PKM	1
GO:0051090	BP	GO:0051090	regulation of DNA-binding transcription factor activity	1/32	432/18670	0.527525	0.545387	0.395276	PHB2	1
GO:0035690	BP	GO:0035690	cellular response to drug	1/32	433/18670	0.528354	0.545387	0.395276	MET	1
GO:0006816	BP	GO:0006816	calcium ion transport	1/32	434/18670	0.529181	0.545387	0.395276	PHB2	1
GO:0061458	BP	GO:0061458	reproductive system development	1/32	434/18670	0.529181	0.545387	0.395276	ANG	1
GO:0050804	BP	GO:0050804	modulation of chemical synaptic transmission	1/32	436/18670	0.530832	0.546511	0.396091	STXBP5L	1
GO:0099177	BP	GO:0099177	regulation of trans-synaptic signaling	1/32	437/18670	0.531656	0.546782	0.396287	STXBP5L	1
GO:0060249	BP	GO:0060249	anatomical structure homeostasis	1/32	439/18670	0.533298	0.547894	0.397093	JCHAIN	1
GO:1901990	BP	GO:1901990	regulation of mitotic cell cycle phase transition	1/32	444/18670	0.53738	0.551507	0.399712	PHB2	1
GO:0010256	BP	GO:0010256	endomembrane system organization	1/32	445/18670	0.538193	0.55176	0.399895	LMAN2	1
GO:0007265	BP	GO:0007265	Ras protein signal transduction	1/32	448/18670	0.540621	0.553088	0.400858	MET	1
GO:0009314	BP	GO:0009314	response to radiation	1/32	448/18670	0.540621	0.553088	0.400858	DBH	1
GO:0048285	BP	GO:0048285	organelle fission	1/32	449/18670	0.541428	0.553333	0.401035	PHB2	1
GO:0006874	BP	GO:0006874	cellular calcium ion homeostasis	1/32	458/18670	0.548627	0.560104	0.405943	CDH5	1
GO:0001819	BP	GO:0001819	positive regulation of cytokine production	1/32	464/18670	0.553365	0.563174	0.408168	IGHD	1
GO:0008544	BP	GO:0008544	epidermis development	1/32	464/18670	0.553365	0.563174	0.408168	CST6	1
GO:0072521	BP	GO:0072521	purine-containing compound metabolic process	1/32	464/18670	0.553365	0.563174	0.408168	PKM	1
GO:0055074	BP	GO:0055074	calcium ion homeostasis	1/32	471/18670	0.558832	0.568146	0.411771	CDH5	1
GO:0002429	BP	GO:0002429	immune response-activating cell surface receptor signaling pathway	1/32	473/18670	0.560382	0.568538	0.412055	IGHD	1
GO:0002757	BP	GO:0002757	immune response-activating signal transduction	1/32	473/18670	0.560382	0.568538	0.412055	IGHD	1
GO:0050769	BP	GO:0050769	positive regulation of neurogenesis	1/32	474/18670	0.561156	0.568731	0.412195	GRN	1
GO:0034248	BP	GO:0034248	regulation of cellular amide metabolic process	1/32	476/18670	0.562698	0.569702	0.412899	ANG	1
GO:0016311	BP	GO:0016311	dephosphorylation	1/32	478/18670	0.564235	0.57026	0.413303	CDH5	1
GO:0043087	BP	GO:0043087	regulation of GTPase activity	1/32	479/18670	0.565001	0.57026	0.413303	STXBP5L	1
GO:0070838	BP	GO:0070838	divalent metal ion transport	1/32	479/18670	0.565001	0.57026	0.413303	PHB2	1
GO:1901987	BP	GO:1901987	regulation of cell cycle phase transition	1/32	480/18670	0.565766	0.570442	0.413435	PHB2	1
GO:0034765	BP	GO:0034765	regulation of ion transmembrane transport	1/32	483/18670	0.568054	0.572158	0.414679	PHB2	1
GO:0022604	BP	GO:0022604	regulation of cell morphogenesis	1/32	484/18670	0.568814	0.572333	0.414805	ENPP2	1
GO:0051249	BP	GO:0051249	regulation of lymphocyte activation	1/32	485/18670	0.569573	0.572506	0.414931	IGHD	1
GO:0072511	BP	GO:0072511	divalent inorganic cation transport	1/32	486/18670	0.57033	0.572677	0.415055	PHB2	1
GO:0072503	BP	GO:0072503	cellular divalent inorganic cation homeostasis	1/32	493/18670	0.575596	0.577371	0.418457	CDH5	1
GO:0006914	BP	GO:0006914	autophagy	1/32	496/18670	0.577834	0.578427	0.419222	MET	1
GO:0061919	BP	GO:0061919	process utilizing autophagic mechanism	1/32	496/18670	0.577834	0.578427	0.419222	MET	1
GO:0010975	BP	GO:0010975	regulation of neuron projection development	1/32	499/18670	0.58006	0.58006	0.420406	GRN	1
GO:0009897	CC	GO:0009897	external side of plasma membrane	5/33	393/19717	0.000459578	0.0244914	0.0182408	IGHD/CDH5/SSC5D/ENPEP/STAB2	5
GO:0062023	CC	GO:0062023	collagen-containing extracellular matrix	5/33	406/19717	0.000532938	0.0244914	0.0182408	A2M/PKM/ANG/INHBE/SSC5D	5
GO:0034466	CC	GO:0034466	chromaffin granule lumen	1/33	1/19717	0.00167368	0.0244914	0.0182408	DBH	1
GO:1902912	CC	GO:1902912	pyruvate kinase complex	1/33	1/19717	0.00167368	0.0244914	0.0182408	PKM	1
GO:0005788	CC	GO:0005788	endoplasmic reticulum lumen	4/33	309/19717	0.00169161	0.0244914	0.0182408	AMBN/FSTL1/IGFBP4/IGFBP1	4
GO:0072562	CC	GO:0072562	blood microparticle	3/33	147/19717	0.00188031	0.0244914	0.0182408	JCHAIN/A2M/IGHD	3
GO:0034774	CC	GO:0034774	secretory granule lumen	4/33	321/19717	0.00194396	0.0244914	0.0182408	DBH/A2M/PKM/GRN	4
GO:0060205	CC	GO:0060205	cytoplasmic vesicle lumen	4/33	325/19717	0.00203358	0.0244914	0.0182408	DBH/A2M/PKM/GRN	4
GO:0031983	CC	GO:0031983	vesicle lumen	4/33	327/19717	0.00207945	0.0244914	0.0182408	DBH/A2M/PKM/GRN	4
GO:0032311	CC	GO:0032311	angiogenin-PRI complex	1/33	2/19717	0.00334465	0.032178	0.0239657	ANG	1
GO:0071750	CC	GO:0071750	dimeric IgA immunoglobulin complex	1/33	3/19717	0.0050129	0.032178	0.0239657	JCHAIN	1
GO:0071752	CC	GO:0071752	secretory dimeric IgA immunoglobulin complex	1/33	3/19717	0.0050129	0.032178	0.0239657	JCHAIN	1
GO:0071753	CC	GO:0071753	IgM immunoglobulin complex	1/33	3/19717	0.0050129	0.032178	0.0239657	JCHAIN	1
GO:0071754	CC	GO:0071754	IgM immunoglobulin complex, circulating	1/33	3/19717	0.0050129	0.032178	0.0239657	JCHAIN	1
GO:0071756	CC	GO:0071756	pentameric IgM immunoglobulin complex	1/33	3/19717	0.0050129	0.032178	0.0239657	JCHAIN	1
GO:1990498	CC	GO:1990498	mitotic spindle microtubule	1/33	3/19717	0.0050129	0.032178	0.0239657	CEP295	1
GO:0042571	CC	GO:0042571	immunoglobulin complex, circulating	2/33	72/19717	0.00645333	0.032178	0.0239657	JCHAIN/IGHD	2
GO:0071745	CC	GO:0071745	IgA immunoglobulin complex	1/33	4/19717	0.00667845	0.032178	0.0239657	JCHAIN	1
GO:0071746	CC	GO:0071746	IgA immunoglobulin complex, circulating	1/33	4/19717	0.00667845	0.032178	0.0239657	JCHAIN	1
GO:0071748	CC	GO:0071748	monomeric IgA immunoglobulin complex	1/33	4/19717	0.00667845	0.032178	0.0239657	JCHAIN	1
GO:0071749	CC	GO:0071749	polymeric IgA immunoglobulin complex	1/33	4/19717	0.00667845	0.032178	0.0239657	JCHAIN	1
GO:0071751	CC	GO:0071751	secretory IgA immunoglobulin complex	1/33	4/19717	0.00667845	0.032178	0.0239657	JCHAIN	1
GO:0042584	CC	GO:0042584	chromaffin granule membrane	1/33	6/19717	0.0100014	0.044173	0.0328995	DBH	1
GO:0098992	CC	GO:0098992	neuronal dense core vesicle	1/33	6/19717	0.0100014	0.044173	0.0328995	STXBP5L	1
GO:0042583	CC	GO:0042583	chromaffin granule	1/33	8/19717	0.0133136	0.0564498	0.0420431	DBH	1
GO:0019814	CC	GO:0019814	immunoglobulin complex	2/33	159/19717	0.0289767	0.118136	0.087986	JCHAIN/IGHD	2
GO:0031045	CC	GO:0031045	dense core granule	1/33	19/19717	0.0313396	0.120483	0.0897342	STXBP5L	1
GO:0034361	CC	GO:0034361	very-low-density lipoprotein particle	1/33	20/19717	0.0329624	0.120483	0.0897342	APOC4	1
GO:0034385	CC	GO:0034385	triglyceride-rich plasma lipoprotein particle	1/33	20/19717	0.0329624	0.120483	0.0897342	APOC4	1
GO:0034364	CC	GO:0034364	high-density lipoprotein particle	1/33	26/19717	0.0426439	0.150675	0.112221	APOC4	1
GO:0016342	CC	GO:0016342	catenin complex	1/33	29/19717	0.0474494	0.162246	0.120839	CDH5	1
GO:0009925	CC	GO:0009925	basal plasma membrane	1/33	34/19717	0.0554065	0.183534	0.136694	MET	1
GO:0034358	CC	GO:0034358	plasma lipoprotein particle	1/33	37/19717	0.0601499	0.187526	0.139667	APOC4	1
GO:1990777	CC	GO:1990777	lipoprotein particle	1/33	37/19717	0.0601499	0.187526	0.139667	APOC4	1
GO:0032994	CC	GO:0032994	protein-lipid complex	1/33	39/19717	0.0632992	0.191706	0.14278	APOC4	1
GO:0031201	CC	GO:0031201	SNARE complex	1/33	47/19717	0.0757947	0.223173	0.166216	STXBP5L	1
GO:0045178	CC	GO:0045178	basal part of cell	1/33	51/19717	0.0819817	0.234866	0.174925	MET	1
GO:0005876	CC	GO:0005876	spindle microtubule	1/33	59/19717	0.0942353	0.262867	0.19578	CEP295	1
GO:0001533	CC	GO:0001533	cornified envelope	1/33	65/19717	0.103321	0.275946	0.205521	CST6	1
GO:0031093	CC	GO:0031093	platelet alpha granule lumen	1/33	67/19717	0.10633	0.275946	0.205521	A2M	1
GO:0033116	CC	GO:0033116	endoplasmic reticulum-Golgi intermediate compartment membrane	1/33	71/19717	0.112319	0.275946	0.205521	LMAN2	1
GO:0048786	CC	GO:0048786	presynaptic active zone	1/33	71/19717	0.112319	0.275946	0.205521	PHB2	1
GO:0098982	CC	GO:0098982	GABA-ergic synapse	1/33	71/19717	0.112319	0.275946	0.205521	PHB2	1
GO:0005765	CC	GO:0005765	lysosomal membrane	2/33	354/19717	0.118086	0.275946	0.205521	GRN/ENPEP	2
GO:0098852	CC	GO:0098852	lytic vacuole membrane	2/33	355/19717	0.118635	0.275946	0.205521	GRN/ENPEP	2
GO:0031594	CC	GO:0031594	neuromuscular junction	1/33	76/19717	0.11975	0.275946	0.205521	STXBP5L	1
GO:0030133	CC	GO:0030133	transport vesicle	2/33	392/19717	0.139389	0.306326	0.228148	SYT13/DBH	2
GO:0031091	CC	GO:0031091	platelet alpha granule	1/33	91/19717	0.141683	0.306326	0.228148	A2M	1
GO:0035578	CC	GO:0035578	azurophil granule lumen	1/33	91/19717	0.141683	0.306326	0.228148	GRN	1
GO:0030134	CC	GO:0030134	COPII-coated ER to Golgi transport vesicle	1/33	93/19717	0.144567	0.306326	0.228148	LMAN2	1
GO:0005604	CC	GO:0005604	basement membrane	1/33	95/19717	0.147442	0.306326	0.228148	ANG	1
GO:0005774	CC	GO:0005774	vacuolar membrane	2/33	412/19717	0.150928	0.306326	0.228148	GRN/ENPEP	2
GO:0005903	CC	GO:0005903	brush border	1/33	99/19717	0.153163	0.306326	0.228148	ENPEP	1
GO:0016363	CC	GO:0016363	nuclear matrix	1/33	109/19717	0.167304	0.32244	0.240149	PHB2	1
GO:0072686	CC	GO:0072686	mitotic spindle	1/33	109/19717	0.167304	0.32244	0.240149	CEP295	1
GO:0022626	CC	GO:0022626	cytosolic ribosome	1/33	112/19717	0.171501	0.324627	0.241778	APOD	1
GO:0005923	CC	GO:0005923	bicellular tight junction	1/33	123/19717	0.186717	0.329127	0.245129	CDH5	1
GO:0101002	CC	GO:0101002	ficolin-1-rich granule	1/33	124/19717	0.188087	0.329127	0.245129	PKM	1
GO:1904813	CC	GO:1904813	ficolin-1-rich granule lumen	1/33	124/19717	0.188087	0.329127	0.245129	PKM	1
GO:0005793	CC	GO:0005793	endoplasmic reticulum-Golgi intermediate compartment	1/33	126/19717	0.190819	0.329127	0.245129	LMAN2	1
GO:0070160	CC	GO:0070160	tight junction	1/33	128/19717	0.193543	0.329127	0.245129	CDH5	1
GO:0034399	CC	GO:0034399	nuclear periphery	1/33	131/19717	0.197612	0.329127	0.245129	PHB2	1
GO:0005777	CC	GO:0005777	peroxisome	1/33	134/19717	0.201661	0.329127	0.245129	TKT	1
GO:0042579	CC	GO:0042579	microbody	1/33	134/19717	0.201661	0.329127	0.245129	TKT	1
GO:0043025	CC	GO:0043025	neuronal cell body	2/33	497/19717	0.201823	0.329127	0.245129	APOD/ANG	2
GO:0005814	CC	GO:0005814	centriole	1/33	139/19717	0.208366	0.334648	0.249242	CEP295	1
GO:0043296	CC	GO:0043296	apical junction complex	1/33	143/19717	0.21369	0.338077	0.251795	CDH5	1
GO:0098862	CC	GO:0098862	cluster of actin-based cell projections	1/33	150/19717	0.222924	0.347462	0.258785	ENPEP	1
GO:0005766	CC	GO:0005766	primary lysosome	1/33	155/19717	0.229456	0.347462	0.258785	GRN	1
GO:0042582	CC	GO:0042582	azurophil granule	1/33	155/19717	0.229456	0.347462	0.258785	GRN	1
GO:0019897	CC	GO:0019897	extrinsic component of plasma membrane	1/33	165/19717	0.242359	0.356299	0.265366	CDH5	1
GO:0030666	CC	GO:0030666	endocytic vesicle membrane	1/33	167/19717	0.244915	0.356299	0.265366	STAB2	1
GO:0030426	CC	GO:0030426	growth cone	1/33	171/19717	0.25	0.356299	0.265366	ANG	1
GO:0005775	CC	GO:0005775	vacuolar lumen	1/33	172/19717	0.251267	0.356299	0.265366	GRN	1
GO:0030427	CC	GO:0030427	site of polarized growth	1/33	176/19717	0.256311	0.356299	0.265366	ANG	1
GO:0005741	CC	GO:0005741	mitochondrial outer membrane	1/33	178/19717	0.258821	0.356299	0.265366	PHB2	1
GO:0005798	CC	GO:0005798	Golgi-associated vesicle	1/33	178/19717	0.258821	0.356299	0.265366	LMAN2	1
GO:0031968	CC	GO:0031968	organelle outer membrane	1/33	201/19717	0.287099	0.386698	0.288008	PHB2	1
GO:0019867	CC	GO:0019867	outer membrane	1/33	203/19717	0.289508	0.386698	0.288008	PHB2	1
GO:0070382	CC	GO:0070382	exocytic vesicle	1/33	207/19717	0.294302	0.386698	0.288008	SYT13	1
GO:0030658	CC	GO:0030658	transport vesicle membrane	1/33	208/19717	0.295496	0.386698	0.288008	DBH	1
GO:0016323	CC	GO:0016323	basolateral plasma membrane	1/33	217/19717	0.306151	0.395756	0.294754	MET	1
GO:0005802	CC	GO:0005802	trans-Golgi network	1/33	236/19717	0.328134	0.419063	0.312113	GRN	1
GO:0005770	CC	GO:0005770	late endosome	1/33	256/19717	0.350545	0.441263	0.328647	GRN	1
GO:0061695	CC	GO:0061695	transferase complex, transferring phosphorus-containing groups	1/33	259/19717	0.353843	0.441263	0.328647	PKM	1
GO:0005840	CC	GO:0005840	ribosome	1/33	272/19717	0.367949	0.453519	0.337775	APOD	1
GO:0150034	CC	GO:0150034	distal axon	1/33	285/19717	0.381757	0.46489	0.346244	ANG	1
GO:0030135	CC	GO:0030135	coated vesicle	1/33	289/19717	0.385946	0.46489	0.346244	LMAN2	1
GO:0019898	CC	GO:0019898	extrinsic component of membrane	1/33	295/19717	0.392179	0.465542	0.34673	CDH5	1
GO:0030667	CC	GO:0030667	secretory granule membrane	1/33	298/19717	0.395272	0.465542	0.34673	DBH	1
GO:0030139	CC	GO:0030139	endocytic vesicle	1/33	303/19717	0.400393	0.466392	0.347363	STAB2	1
GO:0016324	CC	GO:0016324	apical plasma membrane	1/33	318/19717	0.415506	0.478735	0.356556	ENPEP	1
GO:0014069	CC	GO:0014069	postsynaptic density	1/33	324/19717	0.421447	0.479679	0.357258	PHB2	1
GO:0032279	CC	GO:0032279	asymmetric synapse	1/33	328/19717	0.425376	0.479679	0.357258	PHB2	1
GO:0005819	CC	GO:0005819	spindle	1/33	347/19717	0.443684	0.482974	0.359712	CEP295	1
GO:0099572	CC	GO:0099572	postsynaptic specialization	1/33	348/19717	0.444632	0.482974	0.359712	PHB2	1
GO:0098978	CC	GO:0098978	glutamatergic synapse	1/33	349/19717	0.445578	0.482974	0.359712	PHB2	1
GO:0098984	CC	GO:0098984	neuron to neuron synapse	1/33	350/19717	0.446523	0.482974	0.359712	PHB2	1
GO:0098791	CC	GO:0098791	Golgi apparatus subcompartment	1/33	359/19717	0.454955	0.487123	0.362803	GRN	1
GO:0031984	CC	GO:0031984	organelle subcompartment	1/33	380/19717	0.474148	0.501378	0.37342	GRN	1
GO:0045177	CC	GO:0045177	apical part of cell	1/33	384/19717	0.477728	0.501378	0.37342	ENPEP	1
GO:0016607	CC	GO:0016607	nuclear speck	1/33	397/19717	0.489203	0.508388	0.37864	TKT	1
GO:0005874	CC	GO:0005874	microtubule	1/33	416/19717	0.505535	0.515257	0.383757	CEP295	1
GO:0005911	CC	GO:0005911	cell-cell junction	1/33	416/19717	0.505535	0.515257	0.383757	CDH5	1
GO:0005743	CC	GO:0005743	mitochondrial inner membrane	1/33	473/19717	0.551551	0.556804	0.4147	PHB2	1
GO:0098793	CC	GO:0098793	presynapse	1/33	491/19717	0.5652	0.5652	0.420953	PHB2	1
GO:0031995	MF	GO:0031995	insulin-like growth factor II binding	2/34	8/17696	9.96053e-05	0.0106432	0.00633523	IGFBP4/IGFBP1	2
GO:0005044	MF	GO:0005044	scavenger receptor activity	3/34	51/17696	0.000126705	0.0106432	0.00633523	ENPP2/SSC5D/STAB2	3
GO:0031994	MF	GO:0031994	insulin-like growth factor I binding	2/34	12/17696	0.000233655	0.0130847	0.00778849	IGFBP4/IGFBP1	2
GO:0038024	MF	GO:0038024	cargo receptor activity	3/34	76/17696	0.000413927	0.0173849	0.0103482	ENPP2/SSC5D/STAB2	3
GO:0004518	MF	GO:0004518	nuclease activity	4/34	205/17696	0.000617742	0.0207561	0.0123548	ANG/HELZ2/RNASE4/ENPP2	4
GO:0005539	MF	GO:0005539	glycosaminoglycan binding	4/34	229/17696	0.000934047	0.0261533	0.0155674	JCHAIN/ANG/FSTL1/STAB2	4
GO:0005520	MF	GO:0005520	insulin-like growth factor binding	2/34	28/17696	0.00131267	0.0282895	0.016839	IGFBP4/IGFBP1	2
GO:0004540	MF	GO:0004540	ribonuclease activity	3/34	114/17696	0.00134712	0.0282895	0.016839	ANG/HELZ2/RNASE4	3
GO:0005008	MF	GO:0005008	hepatocyte growth factor-activated receptor activity	1/34	1/17696	0.00192134	0.035865	0.0213482	MET	1
GO:0019838	MF	GO:0019838	growth factor binding	3/34	137/17696	0.00227895	0.0382864	0.0227895	A2M/IGFBP4/IGFBP1	3
GO:0008083	MF	GO:0008083	growth factor activity	3/34	163/17696	0.00372325	0.0483275	0.0287664	AMBN/GRN/INHBE	3
GO:0004743	MF	GO:0004743	pyruvate kinase activity	1/34	2/17696	0.00383909	0.0483275	0.0287664	PKM	1
GO:0005507	MF	GO:0005507	copper ion binding	2/34	59/17696	0.00572459	0.0483275	0.0287664	DBH/ANG	2
GO:0004500	MF	GO:0004500	dopamine beta-monooxygenase activity	1/34	3/17696	0.00575327	0.0483275	0.0287664	DBH	1
GO:0004522	MF	GO:0004522	ribonuclease A activity	1/34	3/17696	0.00575327	0.0483275	0.0287664	RNASE4	1
GO:0004802	MF	GO:0004802	transketolase activity	1/34	3/17696	0.00575327	0.0483275	0.0287664	TKT	1
GO:0019862	MF	GO:0019862	IgA binding	1/34	3/17696	0.00575327	0.0483275	0.0287664	JCHAIN	1
GO:0019959	MF	GO:0019959	interleukin-8 binding	1/34	3/17696	0.00575327	0.0483275	0.0287664	A2M	1
GO:0043120	MF	GO:0043120	tumor necrosis factor binding	1/34	3/17696	0.00575327	0.0483275	0.0287664	A2M	1
GO:0047391	MF	GO:0047391	alkylglycerophosphoethanolamine phosphodiesterase activity	1/34	3/17696	0.00575327	0.0483275	0.0287664	ENPP2	1
GO:0016744	MF	GO:0016744	transferase activity, transferring aldehyde or ketonic groups	1/34	4/17696	0.00766388	0.061311	0.0364947	TKT	1
GO:0019905	MF	GO:0019905	syntaxin binding	2/34	75/17696	0.00910824	0.0618429	0.0368112	SYT13/STXBP5L	2
GO:0048029	MF	GO:0048029	monosaccharide binding	2/34	75/17696	0.00910824	0.0618429	0.0368112	DBH/LMAN2	2
GO:0034987	MF	GO:0034987	immunoglobulin receptor binding	2/34	76/17696	0.00934322	0.0618429	0.0368112	JCHAIN/IGHD	2
GO:0016715	MF	GO:0016715	oxidoreductase activity, acting on paired donors, with incorporation or reduction of molecular oxygen, reduced ascorbate as one donor, and incorporation of one atom of oxygen	1/34	5/17696	0.00957092	0.0618429	0.0368112	DBH	1
GO:0070051	MF	GO:0070051	fibrinogen binding	1/34	5/17696	0.00957092	0.0618429	0.0368112	CDH5	1
GO:0004528	MF	GO:0004528	phosphodiesterase I activity	1/34	6/17696	0.0114744	0.0664724	0.0395669	ENPP2	1
GO:0019958	MF	GO:0019958	C-X-C chemokine binding	1/34	6/17696	0.0114744	0.0664724	0.0395669	A2M	1
GO:0030345	MF	GO:0030345	structural constituent of tooth enamel	1/34	6/17696	0.0114744	0.0664724	0.0395669	AMBN	1
GO:0070324	MF	GO:0070324	thyroid hormone binding	1/34	7/17696	0.0133743	0.0748963	0.0445812	PKM	1
GO:0030246	MF	GO:0030246	carbohydrate binding	3/34	271/17696	0.014977	0.0801714	0.0477211	DBH/ENPP2/LMAN2	3
GO:0043184	MF	GO:0043184	vascular endothelial growth factor receptor 2 binding	1/34	8/17696	0.0152707	0.0801714	0.0477211	CDH5	1
GO:0016892	MF	GO:0016892	endoribonuclease activity, producing 3'-phosphomonoesters	1/34	9/17696	0.0171636	0.0848083	0.0504812	RNASE4	1
GO:0019966	MF	GO:0019966	interleukin-1 binding	1/34	9/17696	0.0171636	0.0848083	0.0504812	A2M	1
GO:0000149	MF	GO:0000149	SNARE binding	2/34	110/17696	0.0188715	0.0905833	0.0539186	SYT13/STXBP5L	2
GO:0030955	MF	GO:0030955	potassium ion binding	1/34	11/17696	0.0209387	0.0950731	0.0565911	PKM	1
GO:0070700	MF	GO:0070700	BMP receptor binding	1/34	11/17696	0.0209387	0.0950731	0.0565911	CDH5	1
GO:0005041	MF	GO:0005041	low-density lipoprotein particle receptor activity	1/34	12/17696	0.022821	0.0983058	0.0585154	STAB2	1
GO:0017154	MF	GO:0017154	semaphorin receptor activity	1/34	12/17696	0.022821	0.0983058	0.0585154	MET	1
GO:0004519	MF	GO:0004519	endonuclease activity	2/34	127/17696	0.0246815	0.098799	0.0588089	ANG/RNASE4	2
GO:0005172	MF	GO:0005172	vascular endothelial growth factor receptor binding	1/34	13/17696	0.0246998	0.098799	0.0588089	CDH5	1
GO:0045159	MF	GO:0045159	myosin II binding	1/34	13/17696	0.0246998	0.098799	0.0588089	STXBP5L	1
GO:0005319	MF	GO:0005319	lipid transporter activity	2/34	131/17696	0.0261424	0.102138	0.0607963	APOC4/APOD	2
GO:0030228	MF	GO:0030228	lipoprotein particle receptor activity	1/34	15/17696	0.0284468	0.104552	0.0622333	STAB2	1
GO:0019903	MF	GO:0019903	protein phosphatase binding	2/34	140/17696	0.0295549	0.104552	0.0622333	CDH5/MET	2
GO:0023026	MF	GO:0023026	MHC class II protein complex binding	1/34	16/17696	0.030315	0.104552	0.0622333	PKM	1
GO:0030169	MF	GO:0030169	low-density lipoprotein particle binding	1/34	16/17696	0.030315	0.104552	0.0622333	STAB2	1
GO:0031420	MF	GO:0031420	alkali metal ion binding	1/34	16/17696	0.030315	0.104552	0.0622333	PKM	1
GO:0033218	MF	GO:0033218	amide binding	3/34	356/17696	0.0304943	0.104552	0.0622333	ANG/ENPEP/PHB2	3
GO:0004551	MF	GO:0004551	nucleotide diphosphatase activity	1/34	17/17696	0.0321798	0.106004	0.0630977	ENPP2	1
GO:0042834	MF	GO:0042834	peptidoglycan binding	1/34	17/17696	0.0321798	0.106004	0.0630977	JCHAIN	1
GO:0004622	MF	GO:0004622	lysophospholipase activity	1/34	19/17696	0.0358989	0.111935	0.0666279	ENPP2	1
GO:0070696	MF	GO:0070696	transmembrane receptor protein serine/threonine kinase binding	1/34	19/17696	0.0358989	0.111935	0.0666279	CDH5	1
GO:0140098	MF	GO:0140098	catalytic activity, acting on RNA	3/34	386/17696	0.0374198	0.111935	0.0666279	ANG/HELZ2/RNASE4	3
GO:0003823	MF	GO:0003823	antigen binding	2/34	160/17696	0.0377311	0.111935	0.0666279	JCHAIN/IGHD	2
GO:0031418	MF	GO:0031418	L-ascorbic acid binding	1/34	20/17696	0.0377533	0.111935	0.0666279	DBH	1
GO:0005540	MF	GO:0005540	hyaluronic acid binding	1/34	21/17696	0.0396042	0.111935	0.0666279	STAB2	1
GO:0016894	MF	GO:0016894	endonuclease activity, active with either ribo- or deoxyribonucleic acids and producing 3'-phosphomonoesters	1/34	21/17696	0.0396042	0.111935	0.0666279	RNASE4	1
GO:0005537	MF	GO:0005537	mannose binding	1/34	22/17696	0.0414516	0.111935	0.0666279	LMAN2	1
GO:0015035	MF	GO:0015035	protein disulfide oxidoreductase activity	1/34	22/17696	0.0414516	0.111935	0.0666279	STAB2	1
GO:0030021	MF	GO:0030021	extracellular matrix structural constituent conferring compression resistance	1/34	22/17696	0.0414516	0.111935	0.0666279	AMBN	1
GO:0008201	MF	GO:0008201	heparin binding	2/34	169/17696	0.0416629	0.111935	0.0666279	ANG/FSTL1	2
GO:0046625	MF	GO:0046625	sphingolipid binding	1/34	23/17696	0.0432956	0.111935	0.0666279	PHB2	1
GO:0070006	MF	GO:0070006	metalloaminopeptidase activity	1/34	23/17696	0.0432956	0.111935	0.0666279	ENPEP	1
GO:0004866	MF	GO:0004866	endopeptidase inhibitor activity	2/34	175/17696	0.0443668	0.111935	0.0666279	A2M/CST6	2
GO:0019865	MF	GO:0019865	immunoglobulin binding	1/34	24/17696	0.0451362	0.111935	0.0666279	JCHAIN	1
GO:0023023	MF	GO:0023023	MHC protein complex binding	1/34	25/17696	0.0469733	0.111935	0.0666279	PKM	1
GO:0030247	MF	GO:0030247	polysaccharide binding	1/34	25/17696	0.0469733	0.111935	0.0666279	ENPP2	1
GO:0033612	MF	GO:0033612	receptor serine/threonine kinase binding	1/34	25/17696	0.0469733	0.111935	0.0666279	CDH5	1
GO:0030414	MF	GO:0030414	peptidase inhibitor activity	2/34	182/17696	0.0476022	0.111935	0.0666279	A2M/CST6	2
GO:0061135	MF	GO:0061135	endopeptidase regulator activity	2/34	182/17696	0.0476022	0.111935	0.0666279	A2M/CST6	2
GO:0005112	MF	GO:0005112	Notch binding	1/34	26/17696	0.0488069	0.111935	0.0666279	SNED1	1
GO:0019902	MF	GO:0019902	phosphatase binding	2/34	185/17696	0.0490148	0.111935	0.0666279	CDH5/MET	2
GO:0001968	MF	GO:0001968	fibronectin binding	1/34	27/17696	0.0506372	0.111935	0.0666279	SSC5D	1
GO:0031210	MF	GO:0031210	phosphatidylcholine binding	1/34	27/17696	0.0506372	0.111935	0.0666279	JCHAIN	1
GO:0050997	MF	GO:0050997	quaternary ammonium group binding	1/34	27/17696	0.0506372	0.111935	0.0666279	JCHAIN	1
GO:0031406	MF	GO:0031406	carboxylic acid binding	2/34	193/17696	0.052856	0.115322	0.0686441	DBH/STAB2	2
GO:0043236	MF	GO:0043236	laminin binding	1/34	29/17696	0.0542875	0.116927	0.0695993	SSC5D	1
GO:0043177	MF	GO:0043177	organic acid binding	2/34	205/17696	0.0588131	0.125071	0.074447	DBH/STAB2	2
GO:0019956	MF	GO:0019956	chemokine binding	1/34	32/17696	0.0597373	0.125448	0.0746716	A2M	1
GO:0071813	MF	GO:0071813	lipoprotein particle binding	1/34	33/17696	0.0615471	0.126097	0.0750575	STAB2	1
GO:0071814	MF	GO:0071814	protein-lipid complex binding	1/34	33/17696	0.0615471	0.126097	0.0750575	STAB2	1
GO:0048018	MF	GO:0048018	receptor ligand activity	3/34	482/17696	0.0644995	0.130047	0.0774086	AMBN/GRN/INHBE	3
GO:0061134	MF	GO:0061134	peptidase regulator activity	2/34	219/17696	0.0660439	0.130047	0.0774086	A2M/CST6	2
GO:0030546	MF	GO:0030546	signaling receptor activator activity	3/34	487/17696	0.066107	0.130047	0.0774086	AMBN/GRN/INHBE	3
GO:0005125	MF	GO:0005125	cytokine activity	2/34	220/17696	0.0665714	0.130047	0.0774086	GRN/INHBE	2
GO:0017147	MF	GO:0017147	Wnt-protein binding	1/34	37/17696	0.0687527	0.132764	0.0790261	MET	1
GO:0043531	MF	GO:0043531	ADP binding	1/34	38/17696	0.0705457	0.134678	0.0801656	PKM	1
GO:0015036	MF	GO:0015036	disulfide oxidoreductase activity	1/34	40/17696	0.0741217	0.139915	0.0832828	STAB2	1
GO:0030331	MF	GO:0030331	estrogen receptor binding	1/34	42/17696	0.0776842	0.145011	0.0863158	PHB2	1
GO:1901681	MF	GO:1901681	sulfur compound binding	2/34	250/17696	0.0830359	0.153297	0.0912482	ANG/FSTL1	2
GO:0004177	MF	GO:0004177	aminopeptidase activity	1/34	48/17696	0.0882923	0.161229	0.0959699	ENPEP	1
GO:0015485	MF	GO:0015485	cholesterol binding	1/34	49/17696	0.0900488	0.162669	0.0968267	APOD	1
GO:0005160	MF	GO:0005160	transforming growth factor beta receptor binding	1/34	51/17696	0.0935519	0.167199	0.0995233	INHBE	1
GO:0005544	MF	GO:0005544	calcium-dependent phospholipid binding	1/34	53/17696	0.0970419	0.171611	0.102149	SYT13	1
GO:0032934	MF	GO:0032934	sterol binding	1/34	56/17696	0.102252	0.17411	0.103637	APOD	1
GO:0030276	MF	GO:0030276	clathrin binding	1/34	57/17696	0.103983	0.17411	0.103637	SYT13	1
GO:0050840	MF	GO:0050840	extracellular matrix binding	1/34	57/17696	0.103983	0.17411	0.103637	SSC5D	1
GO:0005126	MF	GO:0005126	cytokine receptor binding	2/34	286/17696	0.104246	0.17411	0.103637	CDH5/INHBE	2
GO:0001786	MF	GO:0001786	phosphatidylserine binding	1/34	58/17696	0.10571	0.17411	0.103637	SYT13	1
GO:0004869	MF	GO:0004869	cysteine-type endopeptidase inhibitor activity	1/34	58/17696	0.10571	0.17411	0.103637	CST6	1
GO:0016667	MF	GO:0016667	oxidoreductase activity, acting on a sulfur group of donors	1/34	58/17696	0.10571	0.17411	0.103637	STAB2	1
GO:0042277	MF	GO:0042277	peptide binding	2/34	295/17696	0.109765	0.178438	0.106213	ANG/ENPEP	2
GO:0048306	MF	GO:0048306	calcium-dependent protein binding	1/34	61/17696	0.110872	0.178438	0.106213	A2M	1
GO:0004714	MF	GO:0004714	transmembrane receptor protein tyrosine kinase activity	1/34	62/17696	0.112586	0.178438	0.106213	MET	1
GO:0008235	MF	GO:0008235	metalloexopeptidase activity	1/34	62/17696	0.112586	0.178438	0.106213	ENPEP	1
GO:0019843	MF	GO:0019843	rRNA binding	1/34	63/17696	0.114297	0.179457	0.10682	ANG	1
GO:0004521	MF	GO:0004521	endoribonuclease activity	1/34	64/17696	0.116005	0.180452	0.107412	RNASE4	1
GO:0030374	MF	GO:0030374	nuclear receptor transcription coactivator activity	1/34	67/17696	0.121109	0.186664	0.111109	HELZ2	1
GO:0017022	MF	GO:0017022	myosin binding	1/34	71/17696	0.12787	0.195293	0.116246	STXBP5L	1
GO:0045296	MF	GO:0045296	cadherin binding	2/34	331/17696	0.132577	0.200657	0.119439	PKM/CDH5	2
GO:0003724	MF	GO:0003724	RNA helicase activity	1/34	78/17696	0.139581	0.209372	0.124626	HELZ2	1
GO:0019199	MF	GO:0019199	transmembrane receptor protein kinase activity	1/34	79/17696	0.141242	0.209988	0.124993	MET	1
GO:0004527	MF	GO:0004527	exonuclease activity	1/34	81/17696	0.144553	0.213026	0.126801	ENPP2	1
GO:0008013	MF	GO:0008013	beta-catenin binding	1/34	82/17696	0.146205	0.213586	0.127134	CDH5	1
GO:0043178	MF	GO:0043178	alcohol binding	1/34	85/17696	0.15114	0.218892	0.130293	APOD	1
GO:0072341	MF	GO:0072341	modified amino acid binding	1/34	89/17696	0.157676	0.226407	0.134766	SYT13	1
GO:0004857	MF	GO:0004857	enzyme inhibitor activity	2/34	375/17696	0.161786	0.228286	0.135884	A2M/CST6	2
GO:0035258	MF	GO:0035258	steroid hormone receptor binding	1/34	92/17696	0.162547	0.228286	0.135884	PHB2	1
GO:1990782	MF	GO:1990782	protein tyrosine kinase binding	1/34	93/17696	0.164164	0.228286	0.135884	CDH5	1
GO:0004867	MF	GO:0004867	serine-type endopeptidase inhibitor activity	1/34	94/17696	0.165779	0.228286	0.135884	A2M	1
GO:0008081	MF	GO:0008081	phosphoric diester hydrolase activity	1/34	94/17696	0.165779	0.228286	0.135884	ENPP2	1
GO:0005496	MF	GO:0005496	steroid binding	1/34	95/17696	0.16739	0.22863	0.13609	APOD	1
GO:0004497	MF	GO:0004497	monooxygenase activity	1/34	99/17696	0.173806	0.235478	0.140166	DBH	1
GO:0004620	MF	GO:0004620	phospholipase activity	1/34	102/17696	0.178586	0.236239	0.140619	ENPP2	1
GO:0042562	MF	GO:0042562	hormone binding	1/34	102/17696	0.178586	0.236239	0.140619	PKM	1
GO:0051087	MF	GO:0051087	chaperone binding	1/34	102/17696	0.178586	0.236239	0.140619	GRN	1
GO:0047485	MF	GO:0047485	protein N-terminus binding	1/34	109/17696	0.189635	0.248896	0.148152	PHB2	1
GO:0016922	MF	GO:0016922	nuclear receptor binding	1/34	110/17696	0.191201	0.249006	0.148218	PHB2	1
GO:0003697	MF	GO:0003697	single-stranded DNA binding	1/34	113/17696	0.195884	0.25121	0.14953	JCHAIN	1
GO:0008238	MF	GO:0008238	exopeptidase activity	1/34	113/17696	0.195884	0.25121	0.14953	ENPEP	1
GO:0005543	MF	GO:0005543	phospholipid binding	2/34	427/17696	0.197672	0.251583	0.149752	JCHAIN/SYT13	2
GO:0031072	MF	GO:0031072	heat shock protein binding	1/34	119/17696	0.205169	0.259161	0.154263	LMAN2	1
GO:0005179	MF	GO:0005179	hormone activity	1/34	122/17696	0.209773	0.262999	0.156547	INHBE	1
GO:0044325	MF	GO:0044325	ion channel binding	1/34	124/17696	0.212828	0.264853	0.15765	CDH5	1
GO:0016298	MF	GO:0016298	lipase activity	1/34	127/17696	0.217389	0.266491	0.158626	ENPP2	1
GO:0002020	MF	GO:0002020	protease binding	1/34	128/17696	0.218903	0.266491	0.158626	A2M	1
GO:0019955	MF	GO:0019955	cytokine binding	1/34	128/17696	0.218903	0.266491	0.158626	A2M	1
GO:0004713	MF	GO:0004713	protein tyrosine kinase activity	1/34	134/17696	0.227931	0.273517	0.162808	MET	1
GO:0070851	MF	GO:0070851	growth factor receptor binding	1/34	134/17696	0.227931	0.273517	0.162808	CDH5	1
GO:0052689	MF	GO:0052689	carboxylic ester hydrolase activity	1/34	136/17696	0.230918	0.275136	0.163771	ENPP2	1
GO:0019842	MF	GO:0019842	vitamin binding	1/34	138/17696	0.233893	0.276718	0.164713	DBH	1
GO:0050839	MF	GO:0050839	cell adhesion molecule binding	2/34	499/17696	0.2488	0.292297	0.173986	PKM/CDH5	2
GO:0035257	MF	GO:0035257	nuclear hormone receptor binding	1/34	152/17696	0.25441	0.296812	0.176674	PHB2	1
GO:0016705	MF	GO:0016705	oxidoreductase activity, acting on paired donors, with incorporation or reduction of molecular oxygen	1/34	159/17696	0.264468	0.306418	0.182392	DBH	1
GO:0004386	MF	GO:0004386	helicase activity	1/34	163/17696	0.270156	0.30875	0.18378	HELZ2	1
GO:0005201	MF	GO:0005201	extracellular matrix structural constituent	1/34	163/17696	0.270156	0.30875	0.18378	AMBN	1
GO:0017137	MF	GO:0017137	Rab GTPase binding	1/34	175/17696	0.286965	0.325744	0.193895	STXBP5L	1
GO:0008237	MF	GO:0008237	metallopeptidase activity	1/34	181/17696	0.295228	0.332875	0.19814	ENPEP	1
GO:0051427	MF	GO:0051427	hormone receptor binding	1/34	185/17696	0.300685	0.336767	0.200457	PHB2	1
GO:0008022	MF	GO:0008022	protein C-terminus binding	1/34	187/17696	0.303398	0.337555	0.200926	PHB2	1
GO:0030674	MF	GO:0030674	protein-macromolecule adaptor activity	1/34	207/17696	0.329973	0.364707	0.217087	JCHAIN	1
GO:0000287	MF	GO:0000287	magnesium ion binding	1/34	213/17696	0.337752	0.370865	0.220753	PKM	1
GO:0008017	MF	GO:0008017	microtubule binding	1/34	246/17696	0.378993	0.413447	0.246099	CEP295	1
GO:0060090	MF	GO:0060090	molecular adaptor activity	1/34	254/17696	0.388609	0.421202	0.250715	JCHAIN	1
GO:0005096	MF	GO:0005096	GTPase activator activity	1/34	273/17696	0.410871	0.442477	0.263379	STXBP5L	1
GO:0061629	MF	GO:0061629	RNA polymerase II-specific DNA-binding transcription factor binding	1/34	277/17696	0.415457	0.444565	0.264622	PHB2	1
GO:0050662	MF	GO:0050662	coenzyme binding	1/34	291/17696	0.431235	0.458529	0.272934	DBH	1
GO:0030695	MF	GO:0030695	GTPase regulator activity	1/34	304/17696	0.445516	0.470734	0.280199	STXBP5L	1
GO:0003713	MF	GO:0003713	transcription coactivator activity	1/34	319/17696	0.461561	0.484639	0.288476	HELZ2	1
GO:0015631	MF	GO:0015631	tubulin binding	1/34	336/17696	0.479201	0.500036	0.297641	CEP295	1
GO:0060589	MF	GO:0060589	nucleoside-triphosphatase regulator activity	1/34	344/17696	0.487307	0.505356	0.300807	STXBP5L	1
GO:0140297	MF	GO:0140297	DNA-binding transcription factor binding	1/34	351/17696	0.494299	0.509462	0.303251	PHB2	1
GO:0042578	MF	GO:0042578	phosphoric ester hydrolase activity	1/34	367/17696	0.509935	0.522373	0.310936	ENPP2	1
GO:0017016	MF	GO:0017016	Ras GTPase binding	1/34	429/17696	0.566212	0.573882	0.341596	STXBP5L	1
GO:0003779	MF	GO:0003779	actin binding	1/34	431/17696	0.567918	0.573882	0.341596	ANG	1
GO:0016887	MF	GO:0016887	ATPase activity	1/34	434/17696	0.570466	0.573882	0.341596	HELZ2	1
GO:0031267	MF	GO:0031267	small GTPase binding	1/34	443/17696	0.578022	0.578022	0.344061	STXBP5L	1
