# Supplementary material for: Proteomic Analysis Reveals sympathetic system and immune-inflammation biomarkers in serum of drug-free obsessive-compulsive disorder
Source: Research Square preprint supplement (doi:10.21203/rs.3.rs-1650133/v1), 2022-05-25
Supplement: Supplementary file 6 [file 62c5466dba3b6befb5783dc2.xlsx]

## Sheet: Sheet1
Supplementary Table 1. Results of protein identification and qulitification
Accession	Description	Coverage	Unique Peptides	Peptides	PSMs	AAs	MW [kDa]	calc. pI	T1/C	T2/C	T3/C	average T/C	t-test p value
P55056	Apolipoprotein C-IV OS=Homo sapiens GN=APOC4 PE=1 SV=1 - [APOC4_HUMAN]	35.43	5	5	9	127	14.5435	8.92432	1.22552	1.20185	1.21202	1.21313	0.00103276
P01591	Immunoglobulin J chain OS=Homo sapiens GN=JCHAIN PE=1 SV=4 - [IGJ_HUMAN]	16.98	2	2	3	159	18.087	5.23682	1.33864	1.40855	1.32201	1.3564	0.00548813
Q7L8C5	Synaptotagmin-13 OS=Homo sapiens GN=SYT13 PE=1 SV=1 - [SYT13_HUMAN]	2.58	1	1	1	426	46.8552	7.66455	1.39224	1.41231	1.2559	1.35348	0.0187794
P09172	Dopamine beta-hydroxylase OS=Homo sapiens GN=DBH PE=1 SV=3 - [DOPO_HUMAN]	16.69	9	9	10	617	69.0207	6.41748	1.39317	1.26985	1.2193	1.29411	0.0294702
P05090	Apolipoprotein D OS=Homo sapiens GN=APOD PE=1 SV=1 - [APOD_HUMAN]	29.1	5	5	7	189	21.2618	5.14795	1.26876	1.36411	1.17893	1.2706	0.0368922
P01023	Alpha-2-macroglobulin OS=Homo sapiens GN=A2M PE=1 SV=3 - [A2MG_HUMAN]	37.18	34	41	95	1474	163.188	6.45557	1.43676	1.20986	1.33074	1.32579	0.038175
P01880	Ig delta chain C region OS=Homo sapiens GN=IGHD PE=1 SV=2 - [IGHD_HUMAN]	5.73	2	2	2	384	42.2272	7.92822	1.7018	1.59732	1.30109	1.5334	0.0470741
Q9NP70	Ameloblastin OS=Homo sapiens GN=AMBN PE=2 SV=1 - [AMBN_HUMAN]	2.46	1	1	1	447	48.2516	4.91943	1.33129	1.5231	1.23945	1.36461	0.0487134
Q9Y2K9	Syntaxin-binding protein 5-like OS=Homo sapiens GN=STXBP5L PE=1 SV=2 - [STB5L_HUMAN]	0.76	1	1	1	1186	131.802	6.94678	0.423733	0.432049	0.448297	0.434693	0.000162774
Q6UX71	Plexin domain-containing protein 2 OS=Homo sapiens GN=PLXDC2 PE=1 SV=1 - [PXDC2_HUMAN]	1.51	1	1	1	529	59.5455	6.45557	0.699257	0.698367	0.682498	0.693374	0.000315087
Q9C0D2	Centrosomal protein of 295 kDa OS=Homo sapiens GN=CEP295 PE=2 SV=4 - [CE295_HUMAN]	0.42	1	1	1	2601	294.996	5.99854	0.398678	0.364146	0.365791	0.376205	0.000324884
P14618	Pyruvate kinase PKM OS=Homo sapiens GN=PKM PE=1 SV=4 - [KPYM_HUMAN]	7.72	4	4	4	531	57.9	7.84033	0.76181	0.769191	0.79154	0.77418	0.00156274
P03950	Angiogenin OS=Homo sapiens GN=ANG PE=1 SV=1 - [ANGI_HUMAN]	6.8	1	1	1	147	16.5394	9.64209	0.815242	0.783803	0.810326	0.803124	0.00245058
P33151	Cadherin-5 OS=Homo sapiens GN=CDH5 PE=1 SV=5 - [CADH5_HUMAN]	7.91	6	6	10	784	87.474	5.42725	0.837584	0.814103	0.846469	0.832719	0.00331459
Q9BYK8	Helicase with zinc finger domain 2 OS=Homo sapiens GN=HELZ2 PE=1 SV=6 - [HELZ2_HUMAN]	0.45	1	1	1	2649	294.465	7.48877	0.413396	0.497555	0.379331	0.430094	0.00377918
P34096	Ribonuclease 4 OS=Homo sapiens GN=RNASE4 PE=1 SV=3 - [RNAS4_HUMAN]	19.05	2	2	2	147	16.8294	9.02686	0.52309	0.621426	0.589381	0.577966	0.00467421
Q8NEN0	Armadillo repeat-containing protein 2 OS=Homo sapiens GN=ARMC2 PE=2 SV=4 - [ARMC2_HUMAN]	1.04	1	1	1	867	96.8054	8.22119	0.484493	0.492386	0.370296	0.449058	0.00508739
P28799	Granulins OS=Homo sapiens GN=GRN PE=1 SV=2 - [GRN_HUMAN]	2.19	1	1	1	593	63.4998	6.82959	0.665158	0.637604	0.565369	0.62271	0.00616178
B9A014	Uncharacterized protein C21orf140 OS=Homo sapiens GN=C21orf140 PE=2 SV=1 - [CU140_HUMAN]	1.99	1	1	1	251	29.1948	8.36768	0.76456	0.822802	0.815448	0.800937	0.00835616
P58166	Inhibin beta E chain OS=Homo sapiens GN=INHBE PE=1 SV=1 - [INHBE_HUMAN]	3.43	1	1	1	350	38.537	9.24658	0.802768	0.805112	0.853615	0.820498	0.00841598
P08581	Hepatocyte growth factor receptor OS=Homo sapiens GN=MET PE=1 SV=4 - [MET_HUMAN]	1.44	2	2	2	1390	155.441	7.32764	0.7569	0.74914	0.662251	0.722764	0.011765
Q15828	Cystatin-M OS=Homo sapiens GN=CST6 PE=1 SV=1 - [CYTM_HUMAN]	6.71	1	1	2	149	16.5004	8.08936	0.712393	0.785358	0.805097	0.767616	0.0144019
P29401	Transketolase OS=Homo sapiens GN=TKT PE=1 SV=3 - [TKT_HUMAN]	2.89	1	1	1	623	67.8347	7.66455	0.738231	0.734659	0.831729	0.768206	0.0182818
Q12841	Follistatin-related protein 1 OS=Homo sapiens GN=FSTL1 PE=1 SV=1 - [FSTL1_HUMAN]	3.9	1	1	1	308	34.9629	5.51611	0.781038	0.871347	0.82213	0.824838	0.0214975
Q13822	Ectonucleotide pyrophosphatase/phosphodiesterase family member 2 OS=Homo sapiens GN=ENPP2 PE=1 SV=3 - [ENPP2_HUMAN]	4.75	3	3	4	863	98.9296	7.37158	0.660237	0.597891	0.772678	0.676935	0.0241561
Q12907	Vesicular integral-membrane protein VIP36 OS=Homo sapiens GN=LMAN2 PE=1 SV=1 - [LMAN2_HUMAN]	9.27	2	2	2	356	40.2031	6.94678	0.865708	0.778219	0.7665	0.803476	0.0244395
P22692	Insulin-like growth factor-binding protein 4 OS=Homo sapiens GN=IGFBP4 PE=1 SV=2 - [IBP4_HUMAN]	10.08	2	2	2	258	27.9155	7.15186	0.694092	0.596849	0.770687	0.687209	0.0248987
A1L4H1	Soluble scavenger receptor cysteine-rich domain-containing protein SSC5D OS=Homo sapiens GN=SSC5D PE=1 SV=3 - [SRCRL_HUMAN]	0.95	1	1	1	1573	165.639	6.12549	0.731269	0.558316	0.706539	0.665375	0.0250695
Q9HCL0	Protocadherin-18 OS=Homo sapiens GN=PCDH18 PE=2 SV=3 - [PCD18_HUMAN]	0.97	1	1	1	1135	126.071	5.14795	0.569029	0.693639	0.768469	0.677046	0.0309427
Q8TER0	Sushi, nidogen and EGF-like domain-containing protein 1 OS=Homo sapiens GN=SNED1 PE=2 SV=2 - [SNED1_HUMAN]	0.99	1	1	1	1413	152.104	6.97607	0.557822	0.396199	0.679468	0.544496	0.030944
Q07075	Glutamyl aminopeptidase OS=Homo sapiens GN=ENPEP PE=1 SV=3 - [AMPE_HUMAN]	1.25	1	1	1	957	109.176	5.46533	0.854995	0.737872	0.698132	0.763666	0.0374732
Q99623	Prohibitin-2 OS=Homo sapiens GN=PHB2 PE=1 SV=2 - [PHB2_HUMAN]	4.01	1	1	1	299	33.2759	9.83252	0.839481	0.67306	0.777199	0.763247	0.0395655
Q4LDE5	Sushi, von Willebrand factor type A, EGF and pentraxin domain-containing protein 1 OS=Homo sapiens GN=SVEP1 PE=1 SV=3 - [SVEP1_HUMAN]	0.39	1	1	1	3571	389.912	5.50342	0.632689	0.674983	0.828643	0.712105	0.040202
P08833	Insulin-like growth factor-binding protein 1 OS=Homo sapiens GN=IGFBP1 PE=1 SV=1 - [IBP1_HUMAN]	5.41	1	1	1	259	27.8853	5.18604	0.847117	0.703145	0.817515	0.789259	0.040754
Q8WWQ8	Stabilin-2 OS=Homo sapiens GN=STAB2 PE=1 SV=3 - [STAB2_HUMAN]	1.02	1	1	1	2551	276.805	6.40479	0.795362	0.643474	0.817285	0.75204	0.0453012
Q92546	RAB6A-GEF complex partner protein 2 OS=Homo sapiens GN=RGP1 PE=1 SV=1 - [RGP1_HUMAN]	7.67	1	1	1	391	42.4287	5.96045	0.975314	0.878318		0.926816	0.372579
P16435	NADPH--cytochrome P450 reductase OS=Homo sapiens GN=POR PE=1 SV=2 - [NCPR_HUMAN]	3.1	1	1	1	677	76.6413	5.57959		1.12162	2.21166	1.66664	0.436314
Q7Z7G0	Target of Nesh-SH3 OS=Homo sapiens GN=ABI3BP PE=1 SV=1 - [TARSH_HUMAN]	4.19	3	3	4	1075	118.569	9.43701	0.913332	0.910243	0.913422	0.912332	0.000142071
Q13449	Limbic system-associated membrane protein OS=Homo sapiens GN=LSAMP PE=1 SV=2 - [LSAMP_HUMAN]	7.99	2	2	2	338	37.3702	6.97607	0.849533	0.838908	0.853975	0.847472	0.000857699
P12109	Collagen alpha-1(VI) chain OS=Homo sapiens GN=COL6A1 PE=1 SV=3 - [CO6A1_HUMAN]	3.7	3	3	4	1028	108.462	5.42725	0.93983	0.945166	0.944595	0.943197	0.000885575
P43251	Biotinidase OS=Homo sapiens GN=BTD PE=1 SV=2 - [BTD_HUMAN]	23.39	10	10	26	543	61.0933	6.25244	0.939845	0.946301	0.93736	0.941169	0.00204512
P17813	Endoglin OS=Homo sapiens GN=ENG PE=1 SV=2 - [EGLN_HUMAN]	2.74	1	1	1	658	70.5331	6.60986	0.914047	0.896451	0.903529	0.904676	0.00286315
P15169	Carboxypeptidase N catalytic chain OS=Homo sapiens GN=CPN1 PE=1 SV=1 - [CBPN_HUMAN]	28.38	11	11	20	458	52.2533	7.34229	0.93058	0.9439	0.938221	0.937567	0.00379893
P02768	Serum albumin OS=Homo sapiens GN=ALB PE=1 SV=2 - [ALBU_HUMAN]	37.6	23	23	40	609	69.3215	6.27783	0.890746	0.903797	0.913975	0.902839	0.00475332
P05543	Thyroxine-binding globulin OS=Homo sapiens GN=SERPINA7 PE=1 SV=2 - [THBG_HUMAN]	43.61	16	16	64	415	46.2946	6.30322	1.07919	1.07862	1.06145	1.07309	0.00628267
Q9UHG3	Prenylcysteine oxidase 1 OS=Homo sapiens GN=PCYOX1 PE=1 SV=3 - [PCYOX_HUMAN]	3.76	2	2	4	505	56.6037	6.17627	1.21062	1.16418	1.16895	1.18125	0.00655671
Q6UXB8	Peptidase inhibitor 16 OS=Homo sapiens GN=PI16 PE=1 SV=1 - [PI16_HUMAN]	17.06	6	6	7	463	49.4395	5.38916	0.870678	0.904928	0.88078	0.885462	0.0077773
Q9BTY2	Plasma alpha-L-fucosidase OS=Homo sapiens GN=FUCA2 PE=1 SV=2 - [FUCO2_HUMAN]	6	3	3	3	467	54.0321	6.25244	0.907627	0.880676	0.874192	0.887498	0.00817848
Q14624	Inter-alpha-trypsin inhibitor heavy chain H4 OS=Homo sapiens GN=ITIH4 PE=1 SV=4 - [ITIH4_HUMAN]	40.54	34	34	274	930	103.293	6.97607	1.09319	1.12821	1.10542	1.10894	0.00875843
P00739	Haptoglobin-related protein OS=Homo sapiens GN=HPR PE=2 SV=2 - [HPTR_HUMAN]	2.01	1	1	1	348	39.0047	7.09326	1.16207	1.15542	1.218	1.1785	0.0121359
P02765	Alpha-2-HS-glycoprotein OS=Homo sapiens GN=AHSG PE=1 SV=1 - [FETUA_HUMAN]	55.59	15	15	143	367	39.2997	5.71924	1.15786	1.16922	1.1153	1.14746	0.0121598
P13671	Complement component C6 OS=Homo sapiens GN=C6 PE=1 SV=3 - [CO6_HUMAN]	38.54	32	32	92	934	104.718	6.75635	1.10348	1.15116	1.11292	1.12252	0.0138611
P22352	Glutathione peroxidase 3 OS=Homo sapiens GN=GPX3 PE=1 SV=2 - [GPX3_HUMAN]	34.51	7	7	18	226	25.5369	8.1333	1.08357	1.08997	1.05825	1.07726	0.0153463
Q14520	Hyaluronan-binding protein 2 OS=Homo sapiens GN=HABP2 PE=1 SV=1 - [HABP2_HUMAN]	23.04	13	13	27	560	62.6304	6.53662	1.13772	1.11101	1.08663	1.11179	0.0169754
P06681	Complement C2 OS=Homo sapiens GN=C2 PE=1 SV=2 - [CO2_HUMAN]	36.84	26	26	68	752	83.2143	7.41553	1.05883	1.06891	1.04297	1.0569	0.0171614
P04003	C4b-binding protein alpha chain OS=Homo sapiens GN=C4BPA PE=1 SV=2 - [C4BPA_HUMAN]	24.29	13	13	46	597	66.9894	7.29834	1.15283	1.19131	1.24291	1.19568	0.0173222
P05362	Intercellular adhesion molecule 1 OS=Homo sapiens GN=ICAM1 PE=1 SV=2 - [ICAM1_HUMAN]	10.53	5	5	5	532	57.789	7.98682	0.888097	0.831244	0.820964	0.846768	0.0180601
Q13790	Apolipoprotein F OS=Homo sapiens GN=APOF PE=1 SV=2 - [APOF_HUMAN]	6.44	2	2	4	326	35.377	5.64307	1.15592	1.21308	1.13327	1.16742	0.0195301
Q15063	Periostin OS=Homo sapiens GN=POSTN PE=1 SV=2 - [POSTN_HUMAN]	6.58	4	4	4	836	93.2553	7.53271	0.974575	0.976808	0.963642	0.971675	0.0200085
Q12860	Contactin-1 OS=Homo sapiens GN=CNTN1 PE=1 SV=1 - [CNTN1_HUMAN]	6.09	5	5	6	1018	113.249	5.89697	1.09134	1.05791	1.09482	1.08136	0.0202796
P04070	Vitamin K-dependent protein C OS=Homo sapiens GN=PROC PE=1 SV=1 - [PROC_HUMAN]	14.1	6	6	9	461	52.0375	6.27783	0.864982	0.89	0.920064	0.891682	0.0209331
Q13740	CD166 antigen OS=Homo sapiens GN=ALCAM PE=1 SV=2 - [CD166_HUMAN]	8.75	4	4	4	583	65.0611	6.25244	1.14224	1.08394	1.12798	1.11805	0.0213904
P01042	Kininogen-1 OS=Homo sapiens GN=KNG1 PE=1 SV=2 - [KNG1_HUMAN]	41.77	32	32	260	644	71.9122	6.81494	1.10551	1.10261	1.06125	1.08979	0.0244149
P05451	Lithostathine-1-alpha OS=Homo sapiens GN=REG1A PE=1 SV=3 - [REG1A_HUMAN]	6.63	1	1	1	166	18.7188	5.93506	1.089	1.05749	1.05558	1.06736	0.0249172
Q15485	Ficolin-2 OS=Homo sapiens GN=FCN2 PE=1 SV=2 - [FCN2_HUMAN]	17.57	4	4	7	313	33.9795	6.771	0.948715	0.965541	0.93767	0.950642	0.0259096
Q92820	Gamma-glutamyl hydrolase OS=Homo sapiens GN=GGH PE=1 SV=2 - [GGH_HUMAN]	15.09	4	4	8	318	35.9412	7.10791	0.973939	0.978273	0.962462	0.971558	0.0264196
O43866	CD5 antigen-like OS=Homo sapiens GN=CD5L PE=1 SV=1 - [CD5L_HUMAN]	25.07	6	6	8	347	38.0629	5.46533	1.09958	1.12088	1.17308	1.13118	0.0266072
P18428	Lipopolysaccharide-binding protein OS=Homo sapiens GN=LBP PE=1 SV=3 - [LBP_HUMAN]	19.33	8	8	22	481	53.3499	6.69775	0.940776	0.962378	0.963756	0.955637	0.0269993
P08603	Complement factor H OS=Homo sapiens GN=CFH PE=1 SV=4 - [CFAH_HUMAN]	46.71	43	50	334	1231	139.005	6.60986	1.06092	1.10787	1.07459	1.08113	0.0282875
P49747	Cartilage oligomeric matrix protein OS=Homo sapiens GN=COMP PE=1 SV=2 - [COMP_HUMAN]	25.5	16	16	20	757	82.8076	4.60205	0.944991	0.892124	0.907708	0.914941	0.0323579
Q6ZN30	Zinc finger protein basonuclin-2 OS=Homo sapiens GN=BNC2 PE=1 SV=1 - [BNC2_HUMAN]	1	1	1	2	1099	122.252	6.52197	1.24506	1.13784	1.1555	1.17947	0.032543
P07225	Vitamin K-dependent protein S OS=Homo sapiens GN=PROS1 PE=1 SV=1 - [PROS_HUMAN]	24.41	15	15	33	676	75.0739	5.66846	1.03438	1.04806	1.06674	1.04973	0.0337961
P27169	Serum paraoxonase/arylesterase 1 OS=Homo sapiens GN=PON1 PE=1 SV=3 - [PON1_HUMAN]	15.77	5	5	9	355	39.7062	5.22412	0.786906	0.883865	0.862202	0.844324	0.0338265
P08195	4F2 cell-surface antigen heavy chain OS=Homo sapiens GN=SLC3A2 PE=1 SV=3 - [4F2_HUMAN]	6.35	3	3	3	630	67.9517	5.0083	0.922438	0.843565	0.876641	0.880881	0.0349326
Q7Z7M0	Multiple epidermal growth factor-like domains protein 8 OS=Homo sapiens GN=MEGF8 PE=1 SV=2 - [MEGF8_HUMAN]	0.7	2	2	2	2845	302.902	6.87354	0.87626	0.780727	0.872476	0.843154	0.0374404
Q9UKY3	Putative inactive carboxylesterase 4 OS=Homo sapiens GN=CES1P1 PE=5 SV=2 - [CES1P_HUMAN]	4.18	1	1	1	287	30.6592	8.03076	0.915306	0.88904	0.946914	0.917087	0.0383869
Q92859	Neogenin OS=Homo sapiens GN=NEO1 PE=1 SV=2 - [NEO1_HUMAN]	3.83	5	5	5	1461	159.917	6.53662	0.869936	0.810905	0.906479	0.86244	0.0386116
P02790	Hemopexin OS=Homo sapiens GN=HPX PE=1 SV=2 - [HEMO_HUMAN]	56.93	25	25	437	462	51.6433	7.02002	1.04571	1.09997	1.07066	1.07211	0.044175
P10643	Complement component C7 OS=Homo sapiens GN=C7 PE=1 SV=2 - [CO7_HUMAN]	54.92	39	39	133	843	93.4573	6.48096	1.08068	1.05744	1.03673	1.05828	0.0443038
Q9BXA9	Sal-like protein 3 OS=Homo sapiens GN=SALL3 PE=1 SV=2 - [SALL3_HUMAN]	1.23	1	1	1	1300	135.26	6.99072	1.14396	1.18526	1.08213	1.13712	0.0445946
P07358	Complement component C8 beta chain OS=Homo sapiens GN=C8B PE=1 SV=3 - [CO8B_HUMAN]	37.56	22	22	60	591	67.0035	8.1333	1.02099	1.04554	1.04677	1.03777	0.0460474
P24593	Insulin-like growth factor-binding protein 5 OS=Homo sapiens GN=IGFBP5 PE=1 SV=1 - [IBP5_HUMAN]	5.88	1	1	2	272	30.55	8.20654	1.14265	1.09382	1.21174	1.1494	0.048635
P06396	Gelsolin OS=Homo sapiens GN=GSN PE=1 SV=1 - [GELS_HUMAN]	39.51	30	30	184	782	85.6442	6.27783	1.09023	1.1142	1.04801	1.08415	0.049013
Q9Y4L1	Hypoxia up-regulated protein 1 OS=Homo sapiens GN=HYOU1 PE=1 SV=1 - [HYOU1_HUMAN]	5.61	4	4	4	999	111.266	5.22412	0.891413	0.833226	0.925389	0.883343	0.0493071
Q9NPR2	Semaphorin-4B OS=Homo sapiens GN=SEMA4B PE=1 SV=3 - [SEM4B_HUMAN]	1.8	2	2	2	832	92.1347	6.94678	1.15314	1.21483	1.09102	1.153	0.0504814
Q15113	Procollagen C-endopeptidase enhancer 1 OS=Homo sapiens GN=PCOLCE PE=1 SV=2 - [PCOC1_HUMAN]	11.8	4	4	5	449	47.942	7.43018	0.960951	0.918679	0.904836	0.928155	0.0510021
P54108	Cysteine-rich secretory protein 3 OS=Homo sapiens GN=CRISP3 PE=1 SV=1 - [CRIS3_HUMAN]	13.06	4	4	7	245	27.612	7.79639	1.02891	1.01199	1.02147	1.02079	0.0512521
Q9BTX1	Nucleoporin NDC1 OS=Homo sapiens GN=NDC1 PE=1 SV=2 - [NDC1_HUMAN]	1.48	1	1	1	674	76.2554	9.08545	1.12726	1.19024	1.29416	1.20389	0.0525117
P24592	Insulin-like growth factor-binding protein 6 OS=Homo sapiens GN=IGFBP6 PE=1 SV=1 - [IBP6_HUMAN]	15.83	3	3	4	240	25.3062	7.81104	0.622482	0.652894	0.846799	0.707392	0.0530969
Q86UN3	Reticulon-4 receptor-like 2 OS=Homo sapiens GN=RTN4RL2 PE=1 SV=1 - [R4RL2_HUMAN]	6.19	2	2	2	420	46.0765	7.62061	0.825305	0.9026	0.918304	0.88207	0.0545818
P39060	Collagen alpha-1(XVIII) chain OS=Homo sapiens GN=COL18A1 PE=1 SV=5 - [COIA1_HUMAN]	4.16	6	6	8	1754	178.077	6.01123	0.884834	0.944906	0.859194	0.896311	0.0550946
P01871	Ig mu chain C region OS=Homo sapiens GN=IGHM PE=1 SV=3 - [IGHM_HUMAN]	25.66	9	9	21	452	49.2755	6.771	1.16436	1.27893	1.4055	1.28293	0.0555813
O00391	Sulfhydryl oxidase 1 OS=Homo sapiens GN=QSOX1 PE=1 SV=3 - [QSOX1_HUMAN]	25.3	15	15	28	747	82.5255	8.92432	0.916471	0.94337	0.966227	0.942023	0.0563588
P02749	Beta-2-glycoprotein 1 OS=Homo sapiens GN=APOH PE=1 SV=3 - [APOH_HUMAN]	40.87	14	14	107	345	38.2727	7.97217	1.06476	1.12861	1.06408	1.08582	0.0569104
Q96RD9	Fc receptor-like protein 5 OS=Homo sapiens GN=FCRL5 PE=1 SV=3 - [FCRL5_HUMAN]	1.74	1	1	2	977	106.371	7.13721	1.19639	1.328	1.49384	1.33941	0.0586849
P05154	Plasma serine protease inhibitor OS=Homo sapiens GN=SERPINA5 PE=1 SV=3 - [IPSP_HUMAN]	5.91	2	2	4	406	45.6457	9.26123	0.867274	0.723342	0.858763	0.81646	0.0588859
P04114	Apolipoprotein B-100 OS=Homo sapiens GN=APOB PE=1 SV=2 - [APOB_HUMAN]	56.08	251	251	1363	4563	515.283	7.04932	1.16007	1.08303	1.07554	1.10621	0.0590236
O75023	Leukocyte immunoglobulin-like receptor subfamily B member 5 OS=Homo sapiens GN=LILRB5 PE=1 SV=1 - [LIRB5_HUMAN]	4.24	2	2	2	590	64.0858	7.29834	0.666452	0.565338	0.83717	0.689653	0.0595539
P00751	Complement factor B OS=Homo sapiens GN=CFB PE=1 SV=2 - [CFAB_HUMAN]	35.21	28	28	180	764	85.4785	7.06396	1.08764	1.15766	1.06947	1.10492	0.0598273
Q99972	Myocilin OS=Homo sapiens GN=MYOC PE=1 SV=2 - [MYOC_HUMAN]	2.78	2	2	3	504	56.9365	5.5415	0.901868	0.945413	0.956925	0.934735	0.0601071
P02750	Leucine-rich alpha-2-glycoprotein OS=Homo sapiens GN=LRG1 PE=1 SV=2 - [A2GL_HUMAN]	37.18	12	12	43	347	38.1541	6.94678	1.02393	1.06399	1.04784	1.04525	0.0602125
P14151	L-selectin OS=Homo sapiens GN=SELL PE=1 SV=2 - [LYAM1_HUMAN]	7.26	3	3	4	372	42.1589	6.59521	1.07825	1.17287	1.21441	1.15518	0.0612738
Q96KN2	Beta-Ala-His dipeptidase OS=Homo sapiens GN=CNDP1 PE=1 SV=4 - [CNDP1_HUMAN]	37.87	16	16	33	507	56.6701	5.30029	1.05671	1.1166	1.05441	1.07591	0.0649961
P07360	Complement component C8 gamma chain OS=Homo sapiens GN=C8G PE=1 SV=3 - [CO8G_HUMAN]	57.92	10	10	47	202	22.2635	8.30908	0.967378	0.982043	0.98662	0.97868	0.0667636
P07602	Prosaposin OS=Homo sapiens GN=PSAP PE=1 SV=2 - [SAP_HUMAN]	3.63	2	2	3	524	58.0739	5.17334	0.822371	0.756265	0.914868	0.831168	0.0668623
P41222	Prostaglandin-H2 D-isomerase OS=Homo sapiens GN=PTGDS PE=1 SV=1 - [PTGDS_HUMAN]	15.26	3	3	4	190	21.0153	7.79639	0.924276	0.782788	0.855465	0.854176	0.0702966
P01011	Alpha-1-antichymotrypsin OS=Homo sapiens GN=SERPINA3 PE=1 SV=2 - [AACT_HUMAN]	39.24	17	17	349	423	47.6205	5.51611	1.08104	1.13966	1.05233	1.09101	0.0713158
P09619	Platelet-derived growth factor receptor beta OS=Homo sapiens GN=PDGFRB PE=1 SV=1 - [PGFRB_HUMAN]	2.53	2	2	2	1106	123.889	4.98291	0.70669	0.638691	0.883394	0.742925	0.0719007
P08185	Corticosteroid-binding globulin OS=Homo sapiens GN=SERPINA6 PE=1 SV=1 - [CBG_HUMAN]	23.46	8	8	24	405	45.1119	6.03662	1.2478	1.24747	1.08312	1.1928	0.0722502
P37837	Transaldolase OS=Homo sapiens GN=TALDO1 PE=1 SV=2 - [TALDO_HUMAN]	7.12	2	2	2	337	37.5165	6.81494	0.778153	0.728929	0.463219	0.656767	0.0724894
Q9Y6R7	IgGFc-binding protein OS=Homo sapiens GN=FCGBP PE=1 SV=3 - [FCGBP_HUMAN]	12.53	35	35	49	5405	571.639	5.33838	1.05108	1.02553	1.02108	1.03256	0.0734656
Q93070	Ecto-ADP-ribosyltransferase 4 OS=Homo sapiens GN=ART4 PE=2 SV=2 - [NAR4_HUMAN]	3.5	1	1	1	314	35.8545	9.21729	1.12355	1.16499	1.05281	1.11378	0.073789
P06733	Alpha-enolase OS=Homo sapiens GN=ENO1 PE=1 SV=2 - [ENOA_HUMAN]	2.07	1	1	1	434	47.1393	7.38623	0.749666	0.918929	0.758749	0.809115	0.0738584
P23471	Receptor-type tyrosine-protein phosphatase zeta OS=Homo sapiens GN=PTPRZ1 PE=1 SV=4 - [PTPRZ_HUMAN]	0.65	1	1	1	2315	254.429	4.88135	1.64354	1.22188	1.40414	1.42319	0.0741048
P08697	Alpha-2-antiplasmin OS=Homo sapiens GN=SERPINF2 PE=1 SV=3 - [A2AP_HUMAN]	39.51	19	19	57	491	54.5311	6.29053	1.13769	1.07313	1.05302	1.08795	0.0749708
P01859	Ig gamma-2 chain C region OS=Homo sapiens GN=IGHG2 PE=1 SV=2 - [IGHG2_HUMAN]	12.58	2	3	3	326	35.8778	7.59131	1.30149	1.57274	1.22125	1.36516	0.0753488
Q15848	Adiponectin OS=Homo sapiens GN=ADIPOQ PE=1 SV=1 - [ADIPO_HUMAN]	15.98	3	3	4	244	26.397	5.74463	0.810428	0.740405	0.917954	0.822929	0.0755228
P01834	Ig kappa chain C region OS=Homo sapiens GN=IGKC PE=1 SV=1 - [IGKC_HUMAN]	32.08	2	2	3	106	11.6017	5.87158	1.20821	1.25405	1.0784	1.18022	0.075652
P00338	L-lactate dehydrogenase A chain OS=Homo sapiens GN=LDHA PE=1 SV=2 - [LDHA_HUMAN]	11.45	3	4	5	332	36.6654	8.26514	0.82279	0.863695	0.945039	0.877175	0.075945
Q9UNN8	Endothelial protein C receptor OS=Homo sapiens GN=PROCR PE=1 SV=1 - [EPCR_HUMAN]	16.39	3	3	4	238	26.6546	7.18115	0.794265	0.68457	0.895889	0.791575	0.076056
P05156	Complement factor I OS=Homo sapiens GN=CFI PE=1 SV=2 - [CFAI_HUMAN]	32.08	17	17	72	583	65.7066	7.50342	1.06282	1.1618	1.08386	1.10283	0.0760664
Q9BY67	Cell adhesion molecule 1 OS=Homo sapiens GN=CADM1 PE=1 SV=2 - [CADM1_HUMAN]	2.94	1	1	1	442	48.4784	5.07178	0.942304	0.938886	0.866127	0.915772	0.0770672
P08253	72 kDa type IV collagenase OS=Homo sapiens GN=MMP2 PE=1 SV=2 - [MMP2_HUMAN]	7.73	5	5	7	660	73.8347	5.46533	1.05488	1.10701	1.04116	1.06768	0.0777244
Q9NQ79	Cartilage acidic protein 1 OS=Homo sapiens GN=CRTAC1 PE=1 SV=2 - [CRAC1_HUMAN]	16.19	8	8	12	661	71.3758	5.12256	1.05981	1.02286	1.03063	1.03777	0.0784022
Q13868	Exosome complex component RRP4 OS=Homo sapiens GN=EXOSC2 PE=1 SV=2 - [EXOS2_HUMAN]	5.8	1	1	1	293	32.7681	7.50342	0.855287	0.94609	0.814898	0.872092	0.0809688
P02655	Apolipoprotein C-II OS=Homo sapiens GN=APOC2 PE=1 SV=1 - [APOC2_HUMAN]	49.5	4	4	30	101	11.2768	4.71631	1.20263	1.25157	1.07255	1.17558	0.0814104
Q99784	Noelin OS=Homo sapiens GN=OLFM1 PE=1 SV=4 - [NOE1_HUMAN]	8.25	4	4	7	485	55.3075	6.94678	1.06509	1.13676	1.0538	1.08522	0.0816916
P49908	Selenoprotein P OS=Homo sapiens GN=SEPP1 PE=1 SV=3 - [SEPP1_HUMAN]	14.17	6	6	10	381	43.1563	7.86963	1.13629	1.13212	1.04012	1.10284	0.081861
P00747	Plasminogen OS=Homo sapiens GN=PLG PE=1 SV=2 - [PLMN_HUMAN]	59.51	42	43	259	810	90.5102	7.23975	1.02467	1.05401	1.0827	1.05379	0.0848349
P07333	Macrophage colony-stimulating factor 1 receptor OS=Homo sapiens GN=CSF1R PE=1 SV=2 - [CSF1R_HUMAN]	2.67	2	2	3	972	107.915	6.3667	0.911994	0.827796	0.939166	0.892985	0.085713
Q14011	Cold-inducible RNA-binding protein OS=Homo sapiens GN=CIRBP PE=1 SV=1 - [CIRBP_HUMAN]	9.3	1	1	1	172	18.6367	9.51025	1.19694	1.16752	1.4329	1.26579	0.0870124
P00746	Complement factor D OS=Homo sapiens GN=CFD PE=1 SV=5 - [CFAD_HUMAN]	36.76	8	8	14	253	27.0159	7.7085	0.916671	0.853538	0.953927	0.908045	0.0882836
P16035	Metalloproteinase inhibitor 2 OS=Homo sapiens GN=TIMP2 PE=1 SV=2 - [TIMP2_HUMAN]	3.18	1	1	1	220	24.3831	7.48877	1.09849	1.1747	1.05319	1.10879	0.0918086
P69905	Hemoglobin subunit alpha OS=Homo sapiens GN=HBA1 PE=1 SV=2 - [HBA_HUMAN]	19.01	2	2	2	142	15.2479	8.67529	0.367091	0.601609	0.8231	0.597267	0.0923092
P20851	C4b-binding protein beta chain OS=Homo sapiens GN=C4BPB PE=1 SV=1 - [C4BPB_HUMAN]	19.44	4	4	6	252	28.3384	5.13525	1.05931	1.22407	1.14477	1.14272	0.0954686
O60658	High affinity cAMP-specific and IBMX-insensitive 3',5'-cyclic phosphodiesterase 8A OS=Homo sapiens GN=PDE8A PE=1 SV=2 - [PDE8A_HUMAN]	1.81	1	1	1	829	93.2448	6.11279	0.47898	0.874824	0.553442	0.635749	0.0955173
P02741	C-reactive protein OS=Homo sapiens GN=CRP PE=1 SV=1 - [CRP_HUMAN]	8.93	2	2	3	224	25.0227	5.63037	0.574968	0.8926	0.703335	0.723634	0.0956991
P11021	78 kDa glucose-regulated protein OS=Homo sapiens GN=HSPA5 PE=1 SV=2 - [GRP78_HUMAN]	20.49	10	11	14	654	72.2884	5.16064	1.06158	1.05111	1.01456	1.04242	0.0967675
P07339	Cathepsin D OS=Homo sapiens GN=CTSD PE=1 SV=1 - [CATD_HUMAN]	17.96	6	6	7	412	44.5236	6.53662	0.812648	0.955099	0.857893	0.875213	0.097164
Q9NTU7	Cerebellin-4 OS=Homo sapiens GN=CBLN4 PE=1 SV=1 - [CBLN4_HUMAN]	5.97	1	1	1	201	21.7944	8.73389	1.09113	1.19721	1.06602	1.11812	0.0989533
P10721	Mast/stem cell growth factor receptor Kit OS=Homo sapiens GN=KIT PE=1 SV=1 - [KIT_HUMAN]	2.77	3	3	3	976	109.794	6.97607	1.06721	1.10249	1.02507	1.06492	0.101118
P08519	Apolipoprotein(a) OS=Homo sapiens GN=LPA PE=1 SV=1 - [APOA_HUMAN]	29.82	17	17	31	4548	500.995	5.88428	0.886071	0.822382	0.956095	0.888183	0.101432
O15554	Intermediate conductance calcium-activated potassium channel protein 4 OS=Homo sapiens GN=KCNN4 PE=1 SV=1 - [KCNN4_HUMAN]	1.87	1	1	1	427	47.6646	9.83252	0.85443	0.801162	0.955262	0.870285	0.102946
P02746	Complement C1q subcomponent subunit B OS=Homo sapiens GN=C1QB PE=1 SV=3 - [C1QB_HUMAN]	20.55	5	5	21	253	26.7045	8.63135	0.944268	0.854177	0.943905	0.914117	0.103256
P09960	Leukotriene A-4 hydrolase OS=Homo sapiens GN=LTA4H PE=1 SV=2 - [LKHA4_HUMAN]	7.69	3	3	3	611	69.2412	6.17627	0.680026	0.92614	0.781021	0.795729	0.10361
P05067	Amyloid beta A4 protein OS=Homo sapiens GN=APP PE=1 SV=3 - [A4_HUMAN]	9.48	5	5	7	770	86.8881	4.81787	0.902054	0.859163	0.968207	0.909808	0.104612
P07357	Complement component C8 alpha chain OS=Homo sapiens GN=C8A PE=1 SV=2 - [CO8A_HUMAN]	39.21	18	18	73	584	65.121	6.46826	1.03642	1.10685	1.04475	1.06267	0.10605
P13591	Neural cell adhesion molecule 1 OS=Homo sapiens GN=NCAM1 PE=1 SV=3 - [NCAM1_HUMAN]	7.58	6	6	8	858	94.5152	4.86865	1.11481	1.15038	1.03161	1.09893	0.10668
O75882	Attractin OS=Homo sapiens GN=ATRN PE=1 SV=2 - [ATRN_HUMAN]	17.77	25	25	42	1429	158.432	7.31299	1.11712	1.15326	1.03211	1.10083	0.106886
P40197	Platelet glycoprotein V OS=Homo sapiens GN=GP5 PE=1 SV=1 - [GPV_HUMAN]	14.11	6	6	10	560	60.9207	9.62744	0.831797	0.912406	0.953972	0.899392	0.107052
P04196	Histidine-rich glycoprotein OS=Homo sapiens GN=HRG PE=1 SV=1 - [HRG_HUMAN]	33.9	18	18	62	525	59.5409	7.50342	1.28391	1.10327	1.1101	1.16576	0.107114
P06276	Cholinesterase OS=Homo sapiens GN=BCHE PE=1 SV=1 - [CHLE_HUMAN]	25.42	13	13	25	602	68.3743	7.41553	1.09623	1.11874	1.02364	1.07954	0.109252
P49913	Cathelicidin antimicrobial peptide OS=Homo sapiens GN=CAMP PE=1 SV=1 - [CAMP_HUMAN]	4.71	1	1	1	170	19.2892	9.40771	1.03895	1.12209	1.18084	1.11396	0.109447
Q12805	EGF-containing fibulin-like extracellular matrix protein 1 OS=Homo sapiens GN=EFEMP1 PE=1 SV=2 - [FBLN3_HUMAN]	11.56	5	5	6	493	54.6042	5.07178	1.0234	1.11869	1.11092	1.08434	0.109997
P00533	Epidermal growth factor receptor OS=Homo sapiens GN=EGFR PE=1 SV=2 - [EGFR_HUMAN]	0.91	1	1	1	1210	134.19	6.68311	0.875029	0.770795	0.542617	0.72948	0.110299
Q9UGM5	Fetuin-B OS=Homo sapiens GN=FETUB PE=1 SV=2 - [FETUB_HUMAN]	23.3	9	9	16	382	42.028	6.82959	1.10837	1.12378	1.02403	1.08539	0.110396
P01344	Insulin-like growth factor II OS=Homo sapiens GN=IGF2 PE=1 SV=1 - [IGF2_HUMAN]	13.89	2	2	5	180	20.1273	9.31982	1.07854	1.14614	1.03726	1.08731	0.110625
Q9NZP8	Complement C1r subcomponent-like protein OS=Homo sapiens GN=C1RL PE=1 SV=2 - [C1RL_HUMAN]	19.71	7	9	20	487	53.4643	7.1958	1.05712	1.12932	1.03947	1.0753	0.111409
P43652	Afamin OS=Homo sapiens GN=AFM PE=1 SV=1 - [AFAM_HUMAN]	51.42	35	35	146	599	69.024	5.89697	1.15947	1.14413	1.02977	1.11112	0.113049
P08319	Alcohol dehydrogenase 4 OS=Homo sapiens GN=ADH4 PE=1 SV=5 - [ADH4_HUMAN]	3.95	1	1	1	380	40.1957	7.94287	0.654082	0.508645	0.902357	0.688361	0.113364
Q8IXL6	Extracellular serine/threonine protein kinase FAM20C OS=Homo sapiens GN=FAM20C PE=1 SV=2 - [FA20C_HUMAN]	4.28	2	2	2	584	66.1925	7.73779	0.787848	0.953386	0.872354	0.871196	0.114498
P12318	Low affinity immunoglobulin gamma Fc region receptor II-a OS=Homo sapiens GN=FCGR2A PE=1 SV=4 - [FCG2A_HUMAN]	2.84	1	1	1	317	34.9785	6.68311	1.02336	1.04112	1.08592	1.05013	0.114634
Q9NY97	N-acetyllactosaminide beta-1,3-N-acetylglucosaminyltransferase 2 OS=Homo sapiens GN=B3GNT2 PE=1 SV=2 - [B3GN2_HUMAN]	3.53	1	1	1	397	45.9926	8.54346	0.84691	0.920094	0.96182	0.909608	0.114757
P00450	Ceruloplasmin OS=Homo sapiens GN=CP PE=1 SV=1 - [CERU_HUMAN]	41.03	36	36	279	1065	122.128	5.71924	1.06475	1.13829	1.03805	1.08036	0.115492
P19823	Inter-alpha-trypsin inhibitor heavy chain H2 OS=Homo sapiens GN=ITIH2 PE=1 SV=2 - [ITIH2_HUMAN]	34.04	30	30	270	946	106.397	6.85889	1.14717	1.12468	1.02548	1.09911	0.117672
Q14515	SPARC-like protein 1 OS=Homo sapiens GN=SPARCL1 PE=1 SV=2 - [SPRL1_HUMAN]	10.39	5	5	5	664	75.1613	4.80518	0.933242	0.848717	0.958351	0.913437	0.120747
P36980	Complement factor H-related protein 2 OS=Homo sapiens GN=CFHR2 PE=1 SV=1 - [FHR2_HUMAN]	29.26	4	7	14	270	30.6306	6.37939	1.07471	1.27985	1.12493	1.15983	0.122394
P07307	Asialoglycoprotein receptor 2 OS=Homo sapiens GN=ASGR2 PE=1 SV=2 - [ASGR2_HUMAN]	3.54	1	1	1	311	35.07	6.25244	0.913938	0.836107	0.963272	0.904439	0.122968
Q9H4A9	Dipeptidase 2 OS=Homo sapiens GN=DPEP2 PE=1 SV=2 - [DPEP2_HUMAN]	9.05	3	3	3	486	53.2723	6.40479	1.09877	1.0325	1.03519	1.05549	0.124509
P01008	Antithrombin-III OS=Homo sapiens GN=SERPINC1 PE=1 SV=1 - [ANT3_HUMAN]	55.39	30	30	268	464	52.5689	6.7124	1.12086	1.09507	1.01727	1.07773	0.129891
Q9H4G4	Golgi-associated plant pathogenesis-related protein 1 OS=Homo sapiens GN=GLIPR2 PE=1 SV=3 - [GAPR1_HUMAN]	16.88	2	2	3	154	17.2075	9.40771	0.837753	0.73581	0.955421	0.842995	0.131793
P22897	Macrophage mannose receptor 1 OS=Homo sapiens GN=MRC1 PE=1 SV=1 - [MRC1_HUMAN]	1.44	2	2	2	1456	165.905	6.53662	0.970768	0.920929	0.851344	0.914347	0.131895
P21817	Ryanodine receptor 1 OS=Homo sapiens GN=RYR1 PE=1 SV=3 - [RYR1_HUMAN]	0.4	1	1	1	5038	564.815	5.30029	0.887259	0.919696	0.983485	0.930147	0.132063
P55290	Cadherin-13 OS=Homo sapiens GN=CDH13 PE=1 SV=1 - [CAD13_HUMAN]	3.51	2	2	2	713	78.2379	4.98291	0.996919	0.981326	0.977114	0.98512	0.132151
Q99969	Retinoic acid receptor responder protein 2 OS=Homo sapiens GN=RARRES2 PE=1 SV=1 - [RARR2_HUMAN]	21.47	3	3	3	163	18.6058	9.08545	1.04371	1.09194	1.19625	1.11063	0.133245
P49641	Alpha-mannosidase 2x OS=Homo sapiens GN=MAN2A2 PE=2 SV=3 - [MA2A2_HUMAN]	0.87	1	1	1	1150	130.457	6.84424	1.2336	1.02998	1.24514	1.16957	0.136009
Q9NZ08	Endoplasmic reticulum aminopeptidase 1 OS=Homo sapiens GN=ERAP1 PE=1 SV=3 - [ERAP1_HUMAN]	2.55	2	2	2	941	107.166	6.45557	1.11431	1.21046	1.03809	1.12095	0.136137
P00740	Coagulation factor IX OS=Homo sapiens GN=F9 PE=1 SV=2 - [FA9_HUMAN]	26.25	10	10	14	461	51.745	5.46533	1.14815	1.09938	1.021	1.08951	0.136902
Q8TAQ9	SUN domain-containing protein 3 OS=Homo sapiens GN=SUN3 PE=2 SV=4 - [SUN3_HUMAN]	1.96	1	1	1	357	40.4776	7.82568	1.01657	1.02865	1.00462	1.01661	0.138908
O75144	ICOS ligand OS=Homo sapiens GN=ICOSLG PE=1 SV=2 - [ICOSL_HUMAN]	5.96	1	1	1	302	33.3277	5.31299	1.11881	1.01356	1.11506	1.08248	0.13915
O43493	Trans-Golgi network integral membrane protein 2 OS=Homo sapiens GN=TGOLN2 PE=1 SV=2 - [TGON2_HUMAN]	2.08	1	1	1	480	51.0824	5.73193	0.975687	0.785056	0.790374	0.850372	0.13963
P32942	Intercellular adhesion molecule 3 OS=Homo sapiens GN=ICAM3 PE=1 SV=2 - [ICAM3_HUMAN]	1.65	1	1	1	547	59.5028	5.42725	1.21646	1.12097	1.03485	1.12409	0.141647
P01033	Metalloproteinase inhibitor 1 OS=Homo sapiens GN=TIMP1 PE=1 SV=1 - [TIMP1_HUMAN]	15.46	3	3	3	207	23.1555	8.104	0.867112	0.980856	0.826678	0.891549	0.143208
O00592	Podocalyxin OS=Homo sapiens GN=PODXL PE=1 SV=2 - [PODXL_HUMAN]	2.33	1	1	1	558	58.5991	5.49072	0.986796	0.910223	0.880519	0.925846	0.143933
P05546	Heparin cofactor 2 OS=Homo sapiens GN=SERPIND1 PE=1 SV=3 - [HEP2_HUMAN]	46.09	20	20	106	499	57.0342	6.90283	1.16773	1.25883	1.03251	1.15302	0.145383
Q13867	Bleomycin hydrolase OS=Homo sapiens GN=BLMH PE=1 SV=1 - [BLMH_HUMAN]	1.54	1	1	1	455	52.528	6.26514	1.07849	1.10816	1.01165	1.0661	0.146516
Q12913	Receptor-type tyrosine-protein phosphatase eta OS=Homo sapiens GN=PTPRJ PE=1 SV=3 - [PTPRJ_HUMAN]	3.59	4	4	5	1337	145.851	5.57959	0.962106	0.839993	0.939301	0.9138	0.148196
O94985	Calsyntenin-1 OS=Homo sapiens GN=CLSTN1 PE=1 SV=1 - [CSTN1_HUMAN]	1.02	1	1	1	981	109.724	4.90674	1.07343	1.23683	1.06941	1.12656	0.148677
P01860	Ig gamma-3 chain C region OS=Homo sapiens GN=IGHG3 PE=1 SV=2 - [IGHG3_HUMAN]	17.24	4	5	8	377	41.2604	7.89893	1.21081	1.02529	1.12472	1.12027	0.154006
P0CF74	Ig lambda-6 chain C region OS=Homo sapiens GN=IGLC6 PE=4 SV=1 - [LAC6_HUMAN]	32.08	2	2	2	106	11.2695	7.23975	1.44592	1.46642	1.0325	1.31495	0.155702
P14314	Glucosidase 2 subunit beta OS=Homo sapiens GN=PRKCSH PE=1 SV=2 - [GLU2B_HUMAN]	1.52	1	1	1	528	59.3878	4.41162	0.306756	0.921654	0.583284	0.603898	0.155749
Q9Y646	Carboxypeptidase Q OS=Homo sapiens GN=CPQ PE=1 SV=1 - [CBPQ_HUMAN]	1.27	1	1	1	472	51.8545	6.17627	0.852163	0.961668	0.719058	0.844296	0.156626
Q9BWP8	Collectin-11 OS=Homo sapiens GN=COLEC11 PE=1 SV=1 - [COL11_HUMAN]	12.18	3	3	5	271	28.647	5.41455	1.23066	1.10574	1.03747	1.12462	0.158452
P27487	Dipeptidyl peptidase 4 OS=Homo sapiens GN=DPP4 PE=1 SV=2 - [DPP4_HUMAN]	1.83	1	1	1	766	88.2225	6.03662	0.886079	0.835805	0.987628	0.903171	0.162386
O00142	Thymidine kinase 2, mitochondrial OS=Homo sapiens GN=TK2 PE=1 SV=4 - [KITM_HUMAN]	2.64	1	1	1	265	30.9848	8.45557	0.863772	0.984221	0.927187	0.92506	0.164038
P06732	Creatine kinase M-type OS=Homo sapiens GN=CKM PE=1 SV=2 - [KCRM_HUMAN]	13.91	4	4	4	381	43.0739	7.25439	0.974835	0.952907	0.872627	0.933456	0.165482
P02775	Platelet basic protein OS=Homo sapiens GN=PPBP PE=1 SV=3 - [CXCL7_HUMAN]	45.31	6	6	45	128	13.8854	8.79248	1.03902	1.11158	1.02353	1.05804	0.16588
P13796	Plastin-2 OS=Homo sapiens GN=LCP1 PE=1 SV=6 - [PLSL_HUMAN]	32.7	16	16	19	627	70.2439	5.42725	0.878831	0.984473	0.940204	0.934503	0.165905
O00533	Neural cell adhesion molecule L1-like protein OS=Homo sapiens GN=CHL1 PE=1 SV=4 - [NCHL1_HUMAN]	6.71	9	9	13	1208	134.987	5.75732	1.06194	1.0236	1.01168	1.03241	0.165998
P07686	Beta-hexosaminidase subunit beta OS=Homo sapiens GN=HEXB PE=1 SV=3 - [HEXB_HUMAN]	2.16	1	1	1	556	63.0712	6.75635	1.67327	1.18204	1.18511	1.34681	0.167558
O14786	Neuropilin-1 OS=Homo sapiens GN=NRP1 PE=1 SV=3 - [NRP1_HUMAN]	8.02	5	5	6	923	103.069	5.88428	0.864148	0.988003	0.920702	0.924284	0.168709
P04217	Alpha-1B-glycoprotein OS=Homo sapiens GN=A1BG PE=1 SV=4 - [A1BG_HUMAN]	43.84	16	16	129	495	54.2195	5.85889	0.997202	0.985254	0.972098	0.984851	0.171842
P10586	Receptor-type tyrosine-protein phosphatase F OS=Homo sapiens GN=PTPRF PE=1 SV=2 - [PTPRF_HUMAN]	2.73	3	3	3	1907	212.744	6.30322	0.792766	0.697286	0.988237	0.826096	0.179359
P0C0L4	Complement C4-A OS=Homo sapiens GN=C4A PE=1 SV=2 - [CO4A_HUMAN]	54.01	4	83	607	1744	192.664	7.07861	0.895898	0.876619	0.999002	0.92384	0.182868
P04278	Sex hormone-binding globulin OS=Homo sapiens GN=SHBG PE=1 SV=2 - [SHBG_HUMAN]	35.32	11	11	17	402	43.7518	6.7124	1.29918	1.06801	1.08206	1.14975	0.183319
P03952	Plasma kallikrein OS=Homo sapiens GN=KLKB1 PE=1 SV=1 - [KLKB1_HUMAN]	44.83	25	25	59	638	71.3228	8.22119	1.09304	1.10356	1.00019	1.0656	0.183897
P54289	Voltage-dependent calcium channel subunit alpha-2/delta-1 OS=Homo sapiens GN=CACNA2D1 PE=1 SV=3 - [CA2D1_HUMAN]	2.99	3	3	4	1103	124.49	5.2749	1.13177	1.23038	1.01334	1.12516	0.184204
O75636	Ficolin-3 OS=Homo sapiens GN=FCN3 PE=1 SV=2 - [FCN3_HUMAN]	29.77	9	9	17	299	32.882	6.66846	1	0.950625	0.943921	0.964849	0.185148
Q07954	Prolow-density lipoprotein receptor-related protein 1 OS=Homo sapiens GN=LRP1 PE=1 SV=2 - [LRP1_HUMAN]	1.41	5	5	5	4544	504.276	5.38916	0.894493	0.85075	0.997455	0.914233	0.187318
Q92954	Proteoglycan 4 OS=Homo sapiens GN=PRG4 PE=1 SV=2 - [PRG4_HUMAN]	10.75	14	14	25	1404	150.984	9.49561	1.03768	1.05653	1.00114	1.03178	0.189795
P20023	Complement receptor type 2 OS=Homo sapiens GN=CR2 PE=1 SV=2 - [CR2_HUMAN]	1.06	1	1	1	1033	112.842	7.51807	1.08558	1.28259	1.05169	1.13995	0.191317
P02748	Complement component C9 OS=Homo sapiens GN=C9 PE=1 SV=2 - [CO9_HUMAN]	44.36	23	23	105	559	63.1327	5.59229	1.00927	1.07471	1.02872	1.03757	0.192495
Q68G75	LEM domain-containing protein 1 OS=Homo sapiens GN=LEMD1 PE=2 SV=2 - [LEMD1_HUMAN]	10.5	1	1	1	181	20.3127	8.49951	0.73842	0.774973	1.00614	0.839844	0.196204
Q9UBQ6	Exostosin-like 2 OS=Homo sapiens GN=EXTL2 PE=1 SV=1 - [EXTL2_HUMAN]	9.09	2	2	4	330	37.4413	8.95361	0.851417	0.988695	0.931945	0.924019	0.19665
P26927	Hepatocyte growth factor-like protein OS=Homo sapiens GN=MST1 PE=1 SV=2 - [HGFL_HUMAN]	24.19	12	12	24	711	80.2675	7.6792	1.14979	1.00174	1.09434	1.08196	0.198137
O15394	Neural cell adhesion molecule 2 OS=Homo sapiens GN=NCAM2 PE=1 SV=2 - [NCAM2_HUMAN]	2.39	2	2	2	837	92.9882	5.60498	0.981096	0.990809	0.940615	0.97084	0.198251
O95897	Noelin-2 OS=Homo sapiens GN=OLFM2 PE=1 SV=2 - [NOE2_HUMAN]	3.3	1	1	1	454	51.3534	7.94287	0.997954	1.28143	1.19652	1.15863	0.199545
Q562R1	Beta-actin-like protein 2 OS=Homo sapiens GN=ACTBL2 PE=1 SV=2 - [ACTBL_HUMAN]	7.98	1	2	2	376	41.976	5.59229	0.866246	0.986004	0.947978	0.933409	0.200125
P05121	Plasminogen activator inhibitor 1 OS=Homo sapiens GN=SERPINE1 PE=1 SV=1 - [PAI1_HUMAN]	1.49	1	1	1	402	45.031	7.1958	0.851456	0.998379	0.912384	0.92074	0.204001
P02654	Apolipoprotein C-I OS=Homo sapiens GN=APOC1 PE=1 SV=1 - [APOC1_HUMAN]	24.1	3	3	9	83	9.32609	8.47021	1.11094	1.10904	0.9944	1.07146	0.204833
Q16270	Insulin-like growth factor-binding protein 7 OS=Homo sapiens GN=IGFBP7 PE=1 SV=1 - [IBP7_HUMAN]	4.61	1	1	1	282	29.1114	7.89893	1.01403	0.772408	0.733971	0.840136	0.209747
P05556	Integrin beta-1 OS=Homo sapiens GN=ITGB1 PE=1 SV=2 - [ITB1_HUMAN]	5.01	4	4	4	798	88.357	5.38916	1.00297	1.10337	1.05087	1.0524	0.212448
P01019	Angiotensinogen OS=Homo sapiens GN=AGT PE=1 SV=1 - [ANGT_HUMAN]	24.74	10	10	83	485	53.1205	6.31592	1.02548	1.16953	1.04585	1.08029	0.216387
P19827	Inter-alpha-trypsin inhibitor heavy chain H1 OS=Homo sapiens GN=ITIH1 PE=1 SV=3 - [ITIH1_HUMAN]	30.95	24	24	288	911	101.326	6.78564	1.06619	1.08164	0.994573	1.04747	0.218774
P62942	Peptidyl-prolyl cis-trans isomerase FKBP1A OS=Homo sapiens GN=FKBP1A PE=1 SV=2 - [FKB1A_HUMAN]	12.04	1	1	1	108	11.9431	8.1626	0.70359	0.806808	1.01244	0.840946	0.221847
O75888	Tumor necrosis factor ligand superfamily member 13 OS=Homo sapiens GN=TNFSF13 PE=1 SV=1 - [TNF13_HUMAN]	5.6	1	1	1	250	27.4161	9.62744	1.02029	1.36085	1.79672	1.39262	0.222689
P98160	Basement membrane-specific heparan sulfate proteoglycan core protein OS=Homo sapiens GN=HSPG2 PE=1 SV=4 - [PGBM_HUMAN]	3.28	11	11	11	4391	468.532	6.50732	0.997748	0.94954	0.890888	0.946059	0.222951
Q8WY91	THAP domain-containing protein 4 OS=Homo sapiens GN=THAP4 PE=1 SV=2 - [THAP4_HUMAN]	1.04	1	1	1	577	62.8506	9.27588	1.26514	1.37322	0.975944	1.20477	0.226367
P01031	Complement C5 OS=Homo sapiens GN=C5 PE=1 SV=4 - [CO5_HUMAN]	39.68	65	66	190	1676	188.186	6.52197	1.04629	1.21267	1.03633	1.09843	0.227384
P61626	Lysozyme C OS=Homo sapiens GN=LYZ PE=1 SV=1 - [LYSC_HUMAN]	6.08	1	1	1	148	16.5263	9.15869	0.756951	0.968556	0.938764	0.88809	0.232675
Q14126	Desmoglein-2 OS=Homo sapiens GN=DSG2 PE=1 SV=2 - [DSG2_HUMAN]	6.89	6	6	9	1118	122.218	5.23682	1.16654	1.03083	1.03097	1.07611	0.234323
P52209	6-phosphogluconate dehydrogenase, decarboxylating OS=Homo sapiens GN=PGD PE=1 SV=3 - [6PGD_HUMAN]	2.9	1	1	1	483	53.106	7.2251	0.994321	1.07114	1.12712	1.06419	0.237311
P02743	Serum amyloid P-component OS=Homo sapiens GN=APCS PE=1 SV=2 - [SAMP_HUMAN]	38.57	10	10	51	223	25.3711	6.53662	1.03987	1.07717	1.31668	1.14457	0.23743
P10809	60 kDa heat shock protein, mitochondrial OS=Homo sapiens GN=HSPD1 PE=1 SV=2 - [CH60_HUMAN]	3.32	2	2	2	573	61.0164	5.87158	0.777457	0.903115	1.00164	0.894071	0.244096
P24821	Tenascin OS=Homo sapiens GN=TNC PE=1 SV=3 - [TENA_HUMAN]	4.91	9	9	9	2201	240.7	4.89404	0.949375	1.00099	0.976746	0.975704	0.2447
Q9HBB8	Cadherin-related family member 5 OS=Homo sapiens GN=CDHR5 PE=1 SV=3 - [CDHR5_HUMAN]	2.13	1	1	1	845	88.1687	4.93213	0.677852	0.897765	0.982136	0.852584	0.245592
P01024	Complement C3 OS=Homo sapiens GN=C3 PE=1 SV=2 - [CO3_HUMAN]	32.23	45	45	94	1663	187.03	6.40479	1.01008	1.02487	1	1.01165	0.248036
P35555	Fibrillin-1 OS=Homo sapiens GN=FBN1 PE=1 SV=3 - [FBN1_HUMAN]	0.45	1	1	1	2871	312.022	4.93213	1.49171	1.08541	1.07576	1.21763	0.25328
P00451	Coagulation factor VIII OS=Homo sapiens GN=F8 PE=1 SV=1 - [FA8_HUMAN]	0.47	1	1	1	2351	266.841	7.35693	0.714416	1.04711	0.709581	0.823702	0.255271
P27797	Calreticulin OS=Homo sapiens GN=CALR PE=1 SV=1 - [CALR_HUMAN]	4.8	2	2	2	417	48.1118	4.43701	1.05712	1.03754	1.2924	1.12902	0.255802
P02747	Complement C1q subcomponent subunit C OS=Homo sapiens GN=C1QC PE=1 SV=3 - [C1QC_HUMAN]	21.22	4	4	28	245	25.7571	8.41162	0.922072	0.786217	0.999036	0.902442	0.257398
P59665	Neutrophil defensin 1 OS=Homo sapiens GN=DEFA1 PE=1 SV=1 - [DEF1_HUMAN]	9.57	1	1	2	94	10.1942	6.99072	1.07838	1.20344	0.997896	1.09324	0.25929
Q01459	Di-N-acetylchitobiase OS=Homo sapiens GN=CTBS PE=1 SV=1 - [DIAC_HUMAN]	2.6	1	1	2	385	43.7316	6.63916	1.04683	1.02953	1.2416	1.10599	0.259378
P13473	Lysosome-associated membrane glycoprotein 2 OS=Homo sapiens GN=LAMP2 PE=1 SV=2 - [LAMP2_HUMAN]	2.2	1	1	1	410	44.9323	5.63037	0.830907	1.02996	0.733483	0.864783	0.261315
P08709	Coagulation factor VII OS=Homo sapiens GN=F7 PE=1 SV=1 - [FA7_HUMAN]	14.38	5	5	6	466	51.5604	7.2251	0.800748	0.837784	1.03125	0.889927	0.263395
P35542	Serum amyloid A-4 protein OS=Homo sapiens GN=SAA4 PE=1 SV=2 - [SAA4_HUMAN]	27.69	4	4	6	130	14.7373	9.0708	1.1762	1.28222	0.964915	1.14111	0.269437
P01877	Ig alpha-2 chain C region OS=Homo sapiens GN=IGHA2 PE=1 SV=3 - [IGHA2_HUMAN]	2.65	1	1	1	340	36.503	6.1001	0.95925	0.783294	0.979319	0.907288	0.27493
P14543	Nidogen-1 OS=Homo sapiens GN=NID1 PE=1 SV=3 - [NID1_HUMAN]	4.73	6	6	7	1247	136.291	5.2876	0.98032	0.982926	1.00373	0.988992	0.275539
P02647	Apolipoprotein A-I OS=Homo sapiens GN=APOA1 PE=1 SV=1 - [APOA1_HUMAN]	28.09	7	7	10	267	30.7589	5.75732	1.18003	1.16668	0.963384	1.10336	0.27827
P07942	Laminin subunit beta-1 OS=Homo sapiens GN=LAMB1 PE=1 SV=2 - [LAMB1_HUMAN]	2.13	3	3	3	1786	197.909	4.94482	1.03303	0.846153	0.84413	0.907771	0.278748
P02751	Fibronectin OS=Homo sapiens GN=FN1 PE=1 SV=4 - [FINC_HUMAN]	38.01	70	70	403	2386	262.46	5.70654	0.936265	1.00666	0.828844	0.923923	0.278992
Q92520	Protein FAM3C OS=Homo sapiens GN=FAM3C PE=1 SV=1 - [FAM3C_HUMAN]	3.52	1	1	1	227	24.6646	8.29443	1.27688	1.10539	0.987545	1.12327	0.279937
P02652	Apolipoprotein A-II OS=Homo sapiens GN=APOA2 PE=1 SV=1 - [APOA2_HUMAN]	41	5	5	12	100	11.1679	6.62451	1.00405	0.982212	0.966481	0.984248	0.285138
P00558	Phosphoglycerate kinase 1 OS=Homo sapiens GN=PGK1 PE=1 SV=3 - [PGK1_HUMAN]	10.31	3	3	4	417	44.5861	8.104	1.04812	1.05819	1.43289	1.17973	0.291553
A6NEY3	Putative golgin subfamily A member 6-like protein 3 OS=Homo sapiens GN=GOLGA6L3 PE=5 SV=3 - [GG6L3_HUMAN]	3.24	1	1	1	463	55.6089	4.79248	0.850271	0.969022	0.993259	0.937517	0.292883
P01009	Alpha-1-antitrypsin OS=Homo sapiens GN=SERPINA1 PE=1 SV=3 - [A1AT_HUMAN]	1.91	1	1	1	418	46.707	5.59229	1.00196	0.962833	0.867293	0.944029	0.296622
Q99715	Collagen alpha-1(XII) chain OS=Homo sapiens GN=COL12A1 PE=1 SV=2 - [COCA1_HUMAN]	0.29	1	1	1	3063	332.941	5.52881	1.04164	1.17776	1.00262	1.07401	0.297987
P12821	Angiotensin-converting enzyme OS=Homo sapiens GN=ACE PE=1 SV=1 - [ACE_HUMAN]	1.91	2	2	2	1306	149.62	6.39209	1.00662	0.875221	0.958179	0.946673	0.299017
P16112	Aggrecan core protein OS=Homo sapiens GN=ACAN PE=1 SV=2 - [PGCA_HUMAN]	0.79	1	1	1	2415	250.04	4.18311	0.972792	1.16384	1.09661	1.07775	0.29914
Q16706	Alpha-mannosidase 2 OS=Homo sapiens GN=MAN2A1 PE=1 SV=2 - [MA2A1_HUMAN]	0.61	1	1	1	1144	131.057	7.57666	0.956773	0.978694	0.719319	0.884929	0.300148
P00748	Coagulation factor XII OS=Homo sapiens GN=F12 PE=1 SV=3 - [FA12_HUMAN]	29.59	16	16	30	615	67.7479	7.73779	0.84757	0.945554	1.01095	0.934691	0.302756
P10646	Tissue factor pathway inhibitor OS=Homo sapiens GN=TFPI PE=1 SV=1 - [TFPI1_HUMAN]	6.91	1	1	1	304	34.992	8.25049	4.56783	1.64808	1.1545	2.4568	0.304792
P15144	Aminopeptidase N OS=Homo sapiens GN=ANPEP PE=1 SV=4 - [AMPN_HUMAN]	16.03	14	14	15	967	109.471	5.47803	1.01761	1.04799	0.995103	1.02023	0.31755
Q76LX8	A disintegrin and metalloproteinase with thrombospondin motifs 13 OS=Homo sapiens GN=ADAMTS13 PE=1 SV=1 - [ATS13_HUMAN]	11.07	14	14	17	1427	153.505	7.1665	0.956008	1.01463	0.939793	0.970144	0.319492
P07359	Platelet glycoprotein Ib alpha chain OS=Homo sapiens GN=GP1BA PE=1 SV=2 - [GP1BA_HUMAN]	12.12	8	8	13	652	71.4952	6.29053	0.97093	1.22643	1.0904	1.09592	0.323361
Q86YW5	Trem-like transcript 1 protein OS=Homo sapiens GN=TREML1 PE=1 SV=2 - [TRML1_HUMAN]	10.29	2	2	3	311	32.6579	6.04932	0.744309	0.778523	1.07257	0.865134	0.324823
P55058	Phospholipid transfer protein OS=Homo sapiens GN=PLTP PE=1 SV=1 - [PLTP_HUMAN]	7.51	3	3	4	493	54.7045	7.00537	1.05025	0.768735	0.86284	0.893942	0.328439
P24387	Corticotropin-releasing factor-binding protein OS=Homo sapiens GN=CRHBP PE=1 SV=2 - [CRHBP_HUMAN]	9.94	2	2	2	322	36.121	6.52197	0.760808	0.999994	0.959183	0.906662	0.333745
P10619	Lysosomal protective protein OS=Homo sapiens GN=CTSA PE=1 SV=2 - [PPGB_HUMAN]	2.29	1	1	1	480	54.4311	6.60986	0.7142	0.93802	1.01152	0.887913	0.33666
P12830	Cadherin-1 OS=Homo sapiens GN=CDH1 PE=1 SV=3 - [CADH1_HUMAN]	5.22	4	4	5	882	97.3959	4.729	1.02119	0.944351	0.856183	0.940575	0.338772
P00709	Alpha-lactalbumin OS=Homo sapiens GN=LALBA PE=1 SV=1 - [LALBA_HUMAN]	5.63	1	1	2	142	16.2141	4.99561	1.30492	1.09783	0.964535	1.12243	0.341831
P68871	Hemoglobin subunit beta OS=Homo sapiens GN=HBB PE=1 SV=2 - [HBB_HUMAN]	61.9	3	7	10	147	15.9883	7.28369	1.07157	0.999426	1.47572	1.18224	0.343866
Q9Y251	Heparanase OS=Homo sapiens GN=HPSE PE=1 SV=2 - [HPSE_HUMAN]	4.97	2	2	3	543	61.1101	9.27588	0.998589	1.1312	1.01997	1.04992	0.348537
P13645	Keratin, type I cytoskeletal 10 OS=Homo sapiens GN=KRT10 PE=1 SV=6 - [K1C10_HUMAN]	14.55	7	8	9	584	58.7917	5.21143	0.974579	0.989497	0.716482	0.893519	0.352534
Q86SQ4	G-protein coupled receptor 126 OS=Homo sapiens GN=GPR126 PE=1 SV=3 - [GP126_HUMAN]	1.97	2	2	2	1221	136.607	7.86963	0.88904	1.01398	0.965981	0.956334	0.353027
Q5SYB0	FERM and PDZ domain-containing protein 1 OS=Homo sapiens GN=FRMPD1 PE=1 SV=1 - [FRPD1_HUMAN]	0.44	1	1	1	1578	173.328	5.24951	1.26382	1.37509	0.888172	1.17569	0.355297
Q10588	ADP-ribosyl cyclase/cyclic ADP-ribose hydrolase 2 OS=Homo sapiens GN=BST1 PE=1 SV=2 - [BST1_HUMAN]	14.78	4	4	5	318	35.7011	7.79639	1.2687	1.01258	1.01789	1.09972	0.359294
Q13201	Multimerin-1 OS=Homo sapiens GN=MMRN1 PE=1 SV=3 - [MMRN1_HUMAN]	8.63	7	7	8	1228	138.023	7.92822	1.01888	1.15916	0.999147	1.05906	0.361737
P36955	Pigment epithelium-derived factor OS=Homo sapiens GN=SERPINF1 PE=1 SV=4 - [PEDF_HUMAN]	36.6	15	15	71	418	46.2833	6.37939	1.03733	1.06076	0.982829	1.02697	0.363069
P00918	Carbonic anhydrase 2 OS=Homo sapiens GN=CA2 PE=1 SV=2 - [CAH2_HUMAN]	14.23	3	3	5	260	29.2279	7.40088	1.0451	1.03072	1.7156	1.26381	0.363326
P54802	Alpha-N-acetylglucosaminidase OS=Homo sapiens GN=NAGLU PE=1 SV=2 - [ANAG_HUMAN]	2.83	2	2	2	743	82.2136	6.65381	1.00424	0.980746	0.868484	0.951157	0.363849
P02656	Apolipoprotein C-III OS=Homo sapiens GN=APOC3 PE=1 SV=1 - [APOC3_HUMAN]	48.48	3	3	20	99	10.8455	5.41455	0.993674	1.0245	1.15975	1.05931	0.364874
P23284	Peptidyl-prolyl cis-trans isomerase B OS=Homo sapiens GN=PPIB PE=1 SV=2 - [PPIB_HUMAN]	9.72	2	2	2	216	23.7275	9.40771	1.04508	0.998004	1.46124	1.16811	0.371719
P22105	Tenascin-X OS=Homo sapiens GN=TNXB PE=1 SV=4 - [TENX_HUMAN]	8.82	23	23	30	4242	457.932	5.17334	0.976725	0.944636	1.01203	0.977797	0.372099
Q06033	Inter-alpha-trypsin inhibitor heavy chain H3 OS=Homo sapiens GN=ITIH3 PE=1 SV=2 - [ITIH3_HUMAN]	23.26	17	17	47	890	99.7865	5.74463	1.05111	1.04065	0.981755	1.0245	0.374043
Q8NBP7	Proprotein convertase subtilisin/kexin type 9 OS=Homo sapiens GN=PCSK9 PE=1 SV=3 - [PCSK9_HUMAN]	12.43	6	6	7	692	74.2391	6.60986	1.06657	1.11957	0.965645	1.05059	0.378933
P00441	Superoxide dismutase [Cu-Zn] OS=Homo sapiens GN=SOD1 PE=1 SV=2 - [SODC_HUMAN]	5.19	1	1	1	154	15.9259	6.12549	1.04239	1.01468	1.74625	1.26777	0.379619
Q8TDJ6	DmX-like protein 2 OS=Homo sapiens GN=DMXL2 PE=1 SV=2 - [DMXL2_HUMAN]	0.23	1	1	5	3036	339.427	6.37939	1.09674	1.16101	0.950814	1.06952	0.379854
P22891	Vitamin K-dependent protein Z OS=Homo sapiens GN=PROZ PE=1 SV=2 - [PROZ_HUMAN]	18.25	6	6	9	400	44.7147	5.97314	1.02678	1.11813	0.985787	1.04357	0.3813
P48740	Mannan-binding lectin serine protease 1 OS=Homo sapiens GN=MASP1 PE=1 SV=3 - [MASP1_HUMAN]	34.91	17	18	43	699	79.1952	5.49072	1.05646	0.991452	1.01507	1.02099	0.384324
P11362	Fibroblast growth factor receptor 1 OS=Homo sapiens GN=FGFR1 PE=1 SV=3 - [FGFR1_HUMAN]	1.58	1	1	1	822	91.8089	6.21436	1.25585	0.935827	1.11484	1.10217	0.38486
P13647	Keratin, type II cytoskeletal 5 OS=Homo sapiens GN=KRT5 PE=1 SV=3 - [K2C5_HUMAN]	3.56	1	2	3	590	62.34	7.73779	1.29912	1.33684	0.860693	1.16555	0.391889
Q9NZD4	Alpha-hemoglobin-stabilizing protein OS=Homo sapiens GN=AHSP PE=1 SV=1 - [AHSP_HUMAN]	9.8	1	1	1	102	11.833	4.99561	1.21849	0.875673	1.42769	1.17395	0.392679
Q9GZT8	NIF3-like protein 1 OS=Homo sapiens GN=NIF3L1 PE=1 SV=2 - [NIF3L_HUMAN]	2.12	1	1	1	377	41.9415	6.65381	1.12801	0.919415	1.40322	1.15021	0.395853
Q6UVK1	Chondroitin sulfate proteoglycan 4 OS=Homo sapiens GN=CSPG4 PE=1 SV=2 - [CSPG4_HUMAN]	0.69	1	1	1	2322	250.382	5.46533	1.02508	0.924836	0.954968	0.968295	0.397424
P14780	Matrix metalloproteinase-9 OS=Homo sapiens GN=MMP9 PE=1 SV=3 - [MMP9_HUMAN]	10.04	6	6	7	707	78.4084	6.06201	0.801967	0.965281	1.02231	0.929853	0.399363
P80188	Neutrophil gelatinase-associated lipocalin OS=Homo sapiens GN=LCN2 PE=1 SV=2 - [NGAL_HUMAN]	16.67	3	3	4	198	22.5737	8.90967	0.963586	1.13179	1.05921	1.05153	0.401003
P02144	Myoglobin OS=Homo sapiens GN=MB PE=1 SV=2 - [MYG_HUMAN]	9.74	1	1	1	154	17.173	7.6792	0.668136	0.573083	1.17277	0.804663	0.403982
P02649	Apolipoprotein E OS=Homo sapiens GN=APOE PE=1 SV=1 - [APOE_HUMAN]	64.98	21	21	74	317	36.1318	5.73193	1.0483	1.01165	0.991975	1.01731	0.404342
Q96PD5	N-acetylmuramoyl-L-alanine amidase OS=Homo sapiens GN=PGLYRP2 PE=1 SV=1 - [PGRP2_HUMAN]	19.97	8	8	47	576	62.1779	7.54736	1.0791	1.05223	0.970855	1.03406	0.405089
Q03591	Complement factor H-related protein 1 OS=Homo sapiens GN=CFHR1 PE=1 SV=2 - [FHR1_HUMAN]	33.64	2	11	31	330	37.626	7.38623	1.04408	0.904433	0.908766	0.952426	0.408375
P10720	Platelet factor 4 variant OS=Homo sapiens GN=PF4V1 PE=1 SV=1 - [PF4V_HUMAN]	37.5	1	3	8	104	11.5453	9.1001	1.05001	0.965121	1.73867	1.25127	0.412819
P08637	Low affinity immunoglobulin gamma Fc region receptor III-A OS=Homo sapiens GN=FCGR3A PE=1 SV=2 - [FCG3A_HUMAN]	14.57	2	5	5	254	29.0707	8.07471	0.985653	1.00992	0.962324	0.985966	0.414426
P30041	Peroxiredoxin-6 OS=Homo sapiens GN=PRDX6 PE=1 SV=3 - [PRDX6_HUMAN]	8.48	2	2	2	224	25.0192	6.37939	0.711148	0.728576	1.13705	0.858925	0.417377
P07738	Bisphosphoglycerate mutase OS=Homo sapiens GN=BPGM PE=1 SV=2 - [PMGE_HUMAN]	4.25	1	1	1	259	29.9865	6.53662	0.737764	0.615192	1.15427	0.835742	0.420035
P06727	Apolipoprotein A-IV OS=Homo sapiens GN=APOA4 PE=1 SV=3 - [APOA4_HUMAN]	65.15	30	31	193	396	45.3715	5.37646	1.04149	0.992753	1.009	1.01441	0.420272
P09486	SPARC OS=Homo sapiens GN=SPARC PE=1 SV=1 - [SPRC_HUMAN]	33.99	11	11	19	303	34.6097	4.84326	0.982471	1.06306	1.02396	1.02316	0.424361
Q96IY4	Carboxypeptidase B2 OS=Homo sapiens GN=CPB2 PE=1 SV=2 - [CBPB2_HUMAN]	19.86	8	8	16	423	48.3934	7.7085	0.99833	1.13437	1.00027	1.04432	0.428712
P11226	Mannose-binding protein C OS=Homo sapiens GN=MBL2 PE=1 SV=2 - [MBL2_HUMAN]	34.68	8	8	14	248	26.127	5.49072	1.19669	0.91646	1.13831	1.08382	0.42966
Q9P232	Contactin-3 OS=Homo sapiens GN=CNTN3 PE=1 SV=3 - [CNTN3_HUMAN]	1.46	1	1	1	1028	112.812	6.30322	1.83251	0.984429	1.00432	1.27375	0.430561
P60709	Actin, cytoplasmic 1 OS=Homo sapiens GN=ACTB PE=1 SV=1 - [ACTB_HUMAN]	27.47	5	8	14	375	41.7097	5.47803	0.85941	0.979071	1.02003	0.952837	0.430922
P49454	Centromere protein F OS=Homo sapiens GN=CENPF PE=1 SV=2 - [CENPF_HUMAN]	0.22	1	1	1	3210	367.537	5.07178	1.0772	1.31915	0.93299	1.10978	0.432618
Q7L523	Ras-related GTP-binding protein A OS=Homo sapiens GN=RRAGA PE=1 SV=1 - [RRAGA_HUMAN]	1.92	1	1	4	313	36.5426	7.72314	1.24237	1.28618	0.862832	1.13046	0.434128
P22792	Carboxypeptidase N subunit 2 OS=Homo sapiens GN=CPN2 PE=1 SV=3 - [CPN2_HUMAN]	31.56	14	14	53	545	60.5181	5.98584	1.00278	1.07296	0.995861	1.02387	0.434702
Q13332	Receptor-type tyrosine-protein phosphatase S OS=Homo sapiens GN=PTPRS PE=1 SV=3 - [PTPRS_HUMAN]	1.64	2	2	2	1948	216.905	6.45557	1.00201	1.00175	0.82278	0.94218	0.434987
P33908	Mannosyl-oligosaccharide 1,2-alpha-mannosidase IA OS=Homo sapiens GN=MAN1A1 PE=1 SV=3 - [MA1A1_HUMAN]	2.91	2	2	2	653	72.9223	6.46826	0.90543	1.02073	4.31608	2.08075	0.435746
O95479	GDH/6PGL endoplasmic bifunctional protein OS=Homo sapiens GN=H6PD PE=1 SV=2 - [G6PE_HUMAN]	1.52	1	1	1	791	88.8364	7.29834	0.956444	1.04936	0.542801	0.849535	0.43579
O94919	Endonuclease domain-containing 1 protein OS=Homo sapiens GN=ENDOD1 PE=1 SV=2 - [ENDD1_HUMAN]	2.6	1	1	1	500	54.9813	5.70654	0.932759	0.903959	1.04201	0.959576	0.437788
P63267	Actin, gamma-enteric smooth muscle OS=Homo sapiens GN=ACTG2 PE=1 SV=1 - [ACTH_HUMAN]	17.02	2	5	8	376	41.8498	5.47803	0.972331	1.0254	1.20032	1.06602	0.438972
P43121	Cell surface glycoprotein MUC18 OS=Homo sapiens GN=MCAM PE=1 SV=2 - [MUC18_HUMAN]	10.37	6	6	10	646	71.5626	5.75732	1.0544	0.966797	1.07198	1.03106	0.440435
P35858	Insulin-like growth factor-binding protein complex acid labile subunit OS=Homo sapiens GN=IGFALS PE=1 SV=1 - [ALS_HUMAN]	43.64	22	22	50	605	65.9938	6.78564	0.967725	1.01231	0.98269	0.987575	0.442912
Q9NPY3	Complement component C1q receptor OS=Homo sapiens GN=CD93 PE=1 SV=3 - [C1QR1_HUMAN]	4.75	2	2	2	652	68.5154	5.43994	0.886782	1.04982	0.92275	0.953117	0.443209
P07478	Trypsin-2 OS=Homo sapiens GN=PRSS2 PE=1 SV=1 - [TRY2_HUMAN]	8.1	1	1	1	247	26.471	4.91943	1.417	1.59658	0.731258	1.24828	0.445763
P31151	Protein S100-A7 OS=Homo sapiens GN=S100A7 PE=1 SV=4 - [S10A7_HUMAN]	22.77	2	2	4	101	11.4636	6.771	3.37464	0.970029	0.932153	1.75894	0.446702
Q13228	Selenium-binding protein 1 OS=Homo sapiens GN=SELENBP1 PE=1 SV=2 - [SBP1_HUMAN]	4.03	2	2	2	472	52.3576	6.3667	0.984752	0.986455	1.61896	1.19672	0.449806
Q6YHK3	CD109 antigen OS=Homo sapiens GN=CD109 PE=1 SV=2 - [CD109_HUMAN]	3.11	4	4	5	1445	161.587	5.84619	1.03283	1.04502	0.97861	1.01882	0.453808
P29622	Kallistatin OS=Homo sapiens GN=SERPINA4 PE=1 SV=3 - [KAIN_HUMAN]	51.05	19	19	54	427	48.5112	7.75244	1.04064	1.07015	0.970592	1.02713	0.455201
P02776	Platelet factor 4 OS=Homo sapiens GN=PF4 PE=1 SV=2 - [PLF4_HUMAN]	34.65	1	3	7	101	10.8379	8.6167	0.777148	0.884869	1.08812	0.916712	0.457382
Q9ULI3	Protein HEG homolog 1 OS=Homo sapiens GN=HEG1 PE=1 SV=3 - [HEG1_HUMAN]	1.3	2	2	3	1381	147.369	6.17627	0.96595	0.940271	1.02519	0.977137	0.459141
P12955	Xaa-Pro dipeptidase OS=Homo sapiens GN=PEPD PE=1 SV=3 - [PEPD_HUMAN]	15.82	6	6	8	493	54.5129	5.99854	0.936409	0.829137	1.05587	0.940472	0.459272
P13598	Intercellular adhesion molecule 2 OS=Homo sapiens GN=ICAM2 PE=1 SV=2 - [ICAM2_HUMAN]	11.64	3	3	3	275	30.6346	7.43018	1.1017	1.07364	0.950611	1.04198	0.461045
O14498	Immunoglobulin superfamily containing leucine-rich repeat protein OS=Homo sapiens GN=ISLR PE=2 SV=1 - [ISLR_HUMAN]	5.61	2	2	2	428	45.9684	5.14795	1.0246	0.94661	0.96518	0.978797	0.462462
P34931	Heat shock 70 kDa protein 1-like OS=Homo sapiens GN=HSPA1L PE=1 SV=2 - [HS71L_HUMAN]	4.99	1	2	2	641	70.3313	6.02393	1.21208	0.832319	1.39609	1.14683	0.469691
Q9BXR6	Complement factor H-related protein 5 OS=Homo sapiens GN=CFHR5 PE=1 SV=1 - [FHR5_HUMAN]	10.37	5	6	8	569	64.3771	7.06396	1.01475	1.0513	0.98487	1.01697	0.470096
Q9H299	SH3 domain-binding glutamic acid-rich-like protein 3 OS=Homo sapiens GN=SH3BGRL3 PE=1 SV=1 - [SH3L3_HUMAN]	19.35	2	2	2	93	10.4313	4.93213	0.870617	1.00001	2.62141	1.49735	0.470402
Q14766	Latent-transforming growth factor beta-binding protein 1 OS=Homo sapiens GN=LTBP1 PE=1 SV=4 - [LTBP1_HUMAN]	2.38	4	4	4	1721	186.673	5.96045	1.02796	0.938798	0.963307	0.976688	0.473125
O95445	Apolipoprotein M OS=Homo sapiens GN=APOM PE=1 SV=2 - [APOM_HUMAN]	8.51	2	2	6	188	21.2394	6.01123	0.971609	1.03702	0.845426	0.951352	0.478138
Q15257	Serine/threonine-protein phosphatase 2A activator OS=Homo sapiens GN=PPP2R4 PE=1 SV=3 - [PTPA_HUMAN]	2.79	1	1	1	358	40.6414	5.93506	0.982275	0.985799	1.33659	1.10155	0.478597
Q8IZF2	Adhesion G protein-coupled receptor F5 OS=Homo sapiens GN=ADGRF5 PE=1 SV=3 - [AGRF5_HUMAN]	4.61	4	4	5	1346	149.361	6.65381	0.990348	0.871791	1.02076	0.960966	0.480889
Q9H0T7	Ras-related protein Rab-17 OS=Homo sapiens GN=RAB17 PE=1 SV=2 - [RAB17_HUMAN]	4.72	1	1	1	212	23.4761	7.84033	0.908146	1.00162	1.7937	1.23449	0.49168
P35900	Keratin, type I cytoskeletal 20 OS=Homo sapiens GN=KRT20 PE=1 SV=1 - [K1C20_HUMAN]	3.54	1	2	2	424	48.4569	5.69385	0.93796	1.06904	0.798992	0.935331	0.494077
P05452	Tetranectin OS=Homo sapiens GN=CLEC3B PE=1 SV=3 - [TETN_HUMAN]	59.41	11	11	46	202	22.5223	5.66846	1.06363	1.13008	0.942411	1.04537	0.495713
Q9NPH3	Interleukin-1 receptor accessory protein OS=Homo sapiens GN=IL1RAP PE=1 SV=2 - [IL1AP_HUMAN]	8.25	5	5	7	570	65.3767	8.11865	1.01957	1.12807	0.968218	1.03862	0.498558
P37802	Transgelin-2 OS=Homo sapiens GN=TAGLN2 PE=1 SV=3 - [TAGL2_HUMAN]	19.1	3	3	3	199	22.3772	8.25049	0.854284	1.14494	1.36175	1.12032	0.49909
P20742	Pregnancy zone protein OS=Homo sapiens GN=PZP PE=1 SV=4 - [PZP_HUMAN]	15.86	15	22	39	1482	163.76	6.37939	0.980789	1.27032	0.983272	1.07813	0.501615
Q8IWJ2	GRIP and coiled-coil domain-containing protein 2 OS=Homo sapiens GN=GCC2 PE=1 SV=4 - [GCC2_HUMAN]	0.71	1	2	2	1684	195.789	5.13525	0.909691	1.10345	0.71959	0.91091	0.505783
Q9H1B4	Nuclear RNA export factor 5 OS=Homo sapiens GN=NXF5 PE=2 SV=1 - [NXF5_HUMAN]	2.52	1	1	2	397	45.5985	8.88037	1.20423	1.38752	0.814402	1.13538	0.507104
P04433	Ig kappa chain V-III region VG (Fragment) OS=Homo sapiens PE=1 SV=1 - [KV309_HUMAN]	7.83	1	1	1	115	12.5673	4.95752	0.958154	0.965168	1.5143	1.14587	0.511457
P10909	Clusterin OS=Homo sapiens GN=CLU PE=1 SV=1 - [CLUS_HUMAN]	35.19	17	17	93	449	52.461	6.26514	1.04574	1.03533	0.972745	1.01794	0.513804
P00736	Complement C1r subcomponent OS=Homo sapiens GN=C1R PE=1 SV=2 - [C1R_HUMAN]	45.25	24	26	98	705	80.0668	6.21436	0.965654	0.992248	1.0111	0.989667	0.515289
Q9NRY4	Rho GTPase-activating protein 35 OS=Homo sapiens GN=ARHGAP35 PE=1 SV=3 - [RHG35_HUMAN]	0.47	1	1	1	1499	170.407	6.63916	0.936417	1.42544	0.999227	1.12036	0.51537
Q9HAT2	Sialate O-acetylesterase OS=Homo sapiens GN=SIAE PE=1 SV=1 - [SIAE_HUMAN]	1.53	1	1	1	523	58.2771	7.32764	0.776597	1.06095	0.967028	0.934858	0.517616
P04745	Alpha-amylase 1 OS=Homo sapiens GN=AMY1A PE=1 SV=2 - [AMY1_HUMAN]	9	1	3	3	511	57.7309	6.93213	1.22096	0.696038	0.665238	0.860745	0.520739
P02753	Retinol-binding protein 4 OS=Homo sapiens GN=RBP4 PE=1 SV=3 - [RET4_HUMAN]	46.27	7	7	80	201	22.9953	6.07471	0.982024	0.996201	1.13122	1.03648	0.523103
P51884	Lumican OS=Homo sapiens GN=LUM PE=1 SV=2 - [LUM_HUMAN]	40.83	13	13	42	338	38.4048	6.60986	1.03522	1.09564	0.959217	1.03003	0.526268
P08294	Extracellular superoxide dismutase [Cu-Zn] OS=Homo sapiens GN=SOD3 PE=1 SV=2 - [SODE_HUMAN]	8.75	2	2	5	240	25.8347	6.60986	1.07799	0.911502	1.19609	1.06186	0.531784
Q02985	Complement factor H-related protein 3 OS=Homo sapiens GN=CFHR3 PE=1 SV=2 - [FHR3_HUMAN]	11.52	3	4	9	330	37.2987	7.54736	0.866579	0.980649	1.03957	0.962266	0.534858
P23470	Receptor-type tyrosine-protein phosphatase gamma OS=Homo sapiens GN=PTPRG PE=1 SV=4 - [PTPRG_HUMAN]	0.48	1	1	2	1445	161.901	6.41748	1.06645	1.32728	0.88935	1.09436	0.535449
P02042	Hemoglobin subunit delta OS=Homo sapiens GN=HBD PE=1 SV=2 - [HBD_HUMAN]	44.9	1	5	6	147	16.0453	8.04541	0.776098	1.05075	1.98405	1.2703	0.536682
Q99497	Protein deglycase DJ-1 OS=Homo sapiens GN=PARK7 PE=1 SV=2 - [PARK7_HUMAN]	3.7	1	1	1	189	19.8785	6.78564	0.712965	0.86765	1.14179	0.907468	0.53737
P12259	Coagulation factor V OS=Homo sapiens GN=F5 PE=1 SV=4 - [FA5_HUMAN]	15.65	29	29	55	2224	251.546	6.04932	1.0135	1.0779	0.974857	1.02209	0.538877
Q9H7P6	Multivesicular body subunit 12B OS=Homo sapiens GN=MVB12B PE=1 SV=2 - [MB12B_HUMAN]	3.45	1	1	1	319	35.5968	8.14795	0.762754	0.633725	1.21828	0.871586	0.544169
P11717	Cation-independent mannose-6-phosphate receptor OS=Homo sapiens GN=IGF2R PE=1 SV=3 - [MPRI_HUMAN]	1.2	3	3	3	2491	274.199	5.93506	0.917772	1.01911	1.33709	1.09132	0.544805
Q04756	Hepatocyte growth factor activator OS=Homo sapiens GN=HGFAC PE=1 SV=1 - [HGFA_HUMAN]	19.54	9	9	18	655	70.6361	7.23975	1.00737	1.00098	0.959157	0.989169	0.548051
P05109	Protein S100-A8 OS=Homo sapiens GN=S100A8 PE=1 SV=1 - [S10A8_HUMAN]	24.73	3	3	3	93	10.8276	7.03467	0.875975	1.09814	1.27237	1.08216	0.548169
Q8TE73	Dynein heavy chain 5, axonemal OS=Homo sapiens GN=DNAH5 PE=1 SV=3 - [DYH5_HUMAN]	0.28	1	1	1	4624	528.684	6.1001	1.02871	1.00869	0.822321	0.95324	0.55054
Q86U17	Serpin A11 OS=Homo sapiens GN=SERPINA11 PE=2 SV=2 - [SPA11_HUMAN]	4.74	2	2	2	422	46.9595	7.6792	1.0437	0.863926	0.981185	0.962937	0.554682
Q9HBM1	Kinetochore protein Spc25 OS=Homo sapiens GN=SPC25 PE=1 SV=1 - [SPC25_HUMAN]	4.91	1	1	1	224	26.1365	8.00146	0.594489	1.09895	2.5284	1.40728	0.554757
Q9Y2H2	Phosphatidylinositide phosphatase SAC2 OS=Homo sapiens GN=INPP5F PE=1 SV=3 - [SAC2_HUMAN]	0.62	1	1	1	1132	128.326	7.02002	1.06881	1.40755	0.857593	1.11132	0.558958
Q99650	Oncostatin-M-specific receptor subunit beta OS=Homo sapiens GN=OSMR PE=1 SV=1 - [OSMR_HUMAN]	0.82	1	1	1	979	110.438	5.8208	0.834625	0.672157	1.18069	0.895824	0.559088
P62987	Ubiquitin-60S ribosomal protein L40 OS=Homo sapiens GN=UBA52 PE=1 SV=2 - [RL40_HUMAN]	14.06	2	2	2	128	14.719	9.83252	0.967082	0.977573	1.24109	1.06191	0.561137
P78417	Glutathione S-transferase omega-1 OS=Homo sapiens GN=GSTO1 PE=1 SV=2 - [GSTO1_HUMAN]	3.32	1	1	1	241	27.548	6.59521	0.956061	1.05606	1.05725	1.02312	0.561736
P0C0L5	Complement C4-B OS=Homo sapiens GN=C4B PE=1 SV=2 - [CO4B_HUMAN]	54.01	4	83	615	1744	192.631	7.26904	1.07183	1.01772	0.970678	1.02008	0.563089
P04406	Glyceraldehyde-3-phosphate dehydrogenase OS=Homo sapiens GN=GAPDH PE=1 SV=3 - [G3P_HUMAN]	13.73	3	3	5	335	36.0304	8.45557	0.870097	1.12316	1.22189	1.07172	0.564302
P63104	14-3-3 protein zeta/delta OS=Homo sapiens GN=YWHAZ PE=1 SV=1 - [1433Z_HUMAN]	8.98	1	2	2	245	27.7277	4.79248	0.960995	1.02396	1.0908	1.02525	0.569891
P26038	Moesin OS=Homo sapiens GN=MSN PE=1 SV=3 - [MOES_HUMAN]	1.73	1	1	1	577	67.7778	6.40479	0.919358	1.08475	1.12136	1.04182	0.570266
P16070	CD44 antigen OS=Homo sapiens GN=CD44 PE=1 SV=3 - [CD44_HUMAN]	4.18	3	3	4	742	81.4874	5.32568	1.08187	1.05152	0.947291	1.02689	0.57716
P23142	Fibulin-1 OS=Homo sapiens GN=FBLN1 PE=1 SV=4 - [FBLN1_HUMAN]	30.73	16	16	28	703	77.1624	5.22412	1.0302	0.984402	0.925981	0.980194	0.578808
P40189	Interleukin-6 receptor subunit beta OS=Homo sapiens GN=IL6ST PE=1 SV=2 - [IL6RB_HUMAN]	1.09	1	1	1	918	103.471	5.94775	0.940088	0.946825	1.04595	0.977621	0.580238
P53634	Dipeptidyl peptidase 1 OS=Homo sapiens GN=CTSC PE=1 SV=2 - [CATC_HUMAN]	4.1	1	1	1	463	51.8203	6.99072	1.08803	0.883313	1.22062	1.06399	0.581221
O43852	Calumenin OS=Homo sapiens GN=CALU PE=1 SV=2 - [CALU_HUMAN]	5.08	1	1	1	315	37.0835	4.64014	0.818325	1.13353	0.860176	0.937344	0.590957
Q9NZK5	Adenosine deaminase CECR1 OS=Homo sapiens GN=CECR1 PE=1 SV=2 - [CECR1_HUMAN]	5.28	2	2	2	511	58.8952	7.91357	1.0549	0.895814	1.23194	1.06088	0.5946
P02786	Transferrin receptor protein 1 OS=Homo sapiens GN=TFRC PE=1 SV=2 - [TFR1_HUMAN]	2.63	2	2	2	760	84.8179	6.60986	0.83367	1.11193	0.899248	0.948283	0.60077
Q96BZ4	Phospholipase D4 OS=Homo sapiens GN=PLD4 PE=2 SV=2 - [PLD4_HUMAN]	2.17	1	1	1	506	55.5913	8.35303	0.8937	0.689563	1.16521	0.916158	0.604721
P20774	Mimecan OS=Homo sapiens GN=OGN PE=1 SV=1 - [MIME_HUMAN]	2.35	1	1	1	298	33.9009	5.63037	1.04453	1.11451	0.935521	1.03152	0.60654
Q5TFQ8	Signal-regulatory protein beta-1 isoform 3 OS=Homo sapiens GN=SIRPB1 PE=1 SV=1 - [SIRBL_HUMAN]	3.52	1	1	1	398	43.3323	7.82568	1.0901	0.746596	0.981272	0.939323	0.610173
Q9Y6Z7	Collectin-10 OS=Homo sapiens GN=COLEC10 PE=2 SV=2 - [COL10_HUMAN]	6.86	2	2	2	277	30.6853	7.32764	1.04485	1.13648	0.927251	1.03619	0.61069
P02452	Collagen alpha-1(I) chain OS=Homo sapiens GN=COL1A1 PE=1 SV=5 - [CO1A1_HUMAN]	0.68	1	1	1	1464	138.857	5.79541	1.0186	1.02247	0.872876	0.971315	0.619059
P00734	Prothrombin OS=Homo sapiens GN=F2 PE=1 SV=2 - [THRB_HUMAN]	59.16	34	34	227	622	69.9921	5.89697	0.971155	0.932679	1.04106	0.981631	0.621042
P32119	Peroxiredoxin-2 OS=Homo sapiens GN=PRDX2 PE=1 SV=5 - [PRDX2_HUMAN]	35.86	8	8	14	198	21.8782	5.97314	0.902636	0.913674	1.55159	1.12263	0.625208
P67936	Tropomyosin alpha-4 chain OS=Homo sapiens GN=TPM4 PE=1 SV=3 - [TPM4_HUMAN]	7.26	2	2	2	248	28.5045	4.69092	0.904387	0.997917	1.30488	1.06906	0.625644
P60174	Triosephosphate isomerase OS=Homo sapiens GN=TPI1 PE=1 SV=3 - [TPIS_HUMAN]	4.2	1	1	1	286	30.7717	5.92236	0.910576	0.947942	1.41307	1.09053	0.631778
P18065	Insulin-like growth factor-binding protein 2 OS=Homo sapiens GN=IGFBP2 PE=1 SV=2 - [IBP2_HUMAN]	15.69	3	3	4	325	34.7912	7.50342	1.00636	1.02374	0.987259	1.00579	0.637924
P17936	Insulin-like growth factor-binding protein 3 OS=Homo sapiens GN=IGFBP3 PE=1 SV=2 - [IBP3_HUMAN]	32.65	7	7	15	291	31.6537	8.68994	0.978179	0.970663	1.02413	0.990991	0.643744
P06702	Protein S100-A9 OS=Homo sapiens GN=S100A9 PE=1 SV=1 - [S10A9_HUMAN]	44.74	4	4	10	114	13.2335	6.12549	0.836297	1.07707	1.30025	1.07121	0.648185
P05155	Plasma protease C1 inhibitor OS=Homo sapiens GN=SERPING1 PE=1 SV=2 - [IC1_HUMAN]	26	12	12	50	500	55.1194	6.55127	1.02106	0.948997	0.996795	0.988951	0.653794
Q9HCF6	Transient receptor potential cation channel subfamily M member 3 OS=Homo sapiens GN=TRPM3 PE=2 SV=4 - [TRPM3_HUMAN]	1.1	1	1	1	1732	197.444	7.15186	0.979798	1.04708	0.91249	0.979789	0.65482
Q13093	Platelet-activating factor acetylhydrolase OS=Homo sapiens GN=PLA2G7 PE=1 SV=1 - [PAFA_HUMAN]	7.03	3	3	5	441	50.0453	7.56201	0.99197	1.06488	0.98301	1.01329	0.659314
P07737	Profilin-1 OS=Homo sapiens GN=PFN1 PE=1 SV=2 - [PROF1_HUMAN]	35.71	4	4	4	140	15.0446	8.26514	0.849128	1.10578	1.20895	1.05462	0.660423
P27918	Properdin OS=Homo sapiens GN=CFP PE=1 SV=2 - [PROP_HUMAN]	18.34	8	8	12	469	51.242	7.89893	1.03803	0.887859	1.00466	0.97685	0.661636
P35908	Keratin, type II cytoskeletal 2 epidermal OS=Homo sapiens GN=KRT2 PE=1 SV=2 - [K22E_HUMAN]	12.05	5	7	9	639	65.3932	8.00146	0.973447	1.1485	0.670214	0.93072	0.669118
P11279	Lysosome-associated membrane glycoprotein 1 OS=Homo sapiens GN=LAMP1 PE=1 SV=3 - [LAMP1_HUMAN]	4.56	2	2	2	417	44.8538	8.74854	1.07888	0.878233	1.17068	1.0426	0.670625
P05164	Myeloperoxidase OS=Homo sapiens GN=MPO PE=1 SV=1 - [PERM_HUMAN]	8.05	5	5	5	745	83.8148	8.96826	0.796843	0.889468	1.15542	0.947244	0.672067
P00488	Coagulation factor XIII A chain OS=Homo sapiens GN=F13A1 PE=1 SV=4 - [F13A_HUMAN]	8.33	5	5	7	732	83.2146	6.0874	1.01591	1.04663	0.84684	0.969793	0.674809
P80108	Phosphatidylinositol-glycan-specific phospholipase D OS=Homo sapiens GN=GPLD1 PE=1 SV=3 - [PHLD_HUMAN]	14.05	10	10	15	840	92.278	6.3667	1.02879	0.985215	0.954755	0.989587	0.675713
Q86UD1	Out at first protein homolog OS=Homo sapiens GN=OAF PE=2 SV=1 - [OAF_HUMAN]	6.59	2	2	2	273	30.6686	6.84424	1.00659	1.06894	0.966207	1.01391	0.687319
P31944	Caspase-14 OS=Homo sapiens GN=CASP14 PE=1 SV=2 - [CASPE_HUMAN]	6.2	1	1	1	242	27.662	5.57959	1.1805	0.836667	1.12772	1.0483	0.695708
P00742	Coagulation factor X OS=Homo sapiens GN=F10 PE=1 SV=2 - [FA10_HUMAN]	22.95	11	11	29	488	54.6965	5.93506	1.00422	1.02248	0.93977	0.988823	0.69952
P04746	Pancreatic alpha-amylase OS=Homo sapiens GN=AMY2A PE=1 SV=2 - [AMYP_HUMAN]	9	1	3	4	511	57.67	7.04932	1.07196	1.07069	0.920784	1.02114	0.714449
P00491	Purine nucleoside phosphorylase OS=Homo sapiens GN=PNP PE=1 SV=2 - [PNPH_HUMAN]	5.88	1	1	1	289	32.0972	6.94678	0.801637	1.04505	1.34659	1.06443	0.722332
P30101	Protein disulfide-isomerase A3 OS=Homo sapiens GN=PDIA3 PE=1 SV=4 - [PDIA3_HUMAN]	2.38	1	1	1	505	56.7468	6.354	0.968122	0.928104	1.05755	0.984592	0.726151
P35527	Keratin, type I cytoskeletal 9 OS=Homo sapiens GN=KRT9 PE=1 SV=3 - [K1C9_HUMAN]	14.29	7	8	12	623	62.0268	5.23682	1.0562	1.03405	0.818071	0.96944	0.726366
O75815	Breast cancer anti-estrogen resistance protein 3 OS=Homo sapiens GN=BCAR3 PE=1 SV=1 - [BCAR3_HUMAN]	2.67	1	1	1	825	92.5068	7.95752	1.01064	1.25163	0.869808	1.04403	0.731033
P08571	Monocyte differentiation antigen CD14 OS=Homo sapiens GN=CD14 PE=1 SV=2 - [CD14_HUMAN]	33.07	11	11	20	375	40.0507	6.22705	1.01078	0.973657	1.03675	1.00706	0.736808
P03951	Coagulation factor XI OS=Homo sapiens GN=F11 PE=1 SV=1 - [FA11_HUMAN]	23.84	14	14	17	625	70.0636	8.104	1.19085	0.984708	0.918899	1.03149	0.73772
Q9NZV8	Potassium voltage-gated channel subfamily D member 2 OS=Homo sapiens GN=KCND2 PE=1 SV=2 - [KCND2_HUMAN]	1.9	1	1	1	630	70.4914	7.97217	0.906966	0.779486	1.61048	1.09898	0.738556
Q9UBX1	Cathepsin F OS=Homo sapiens GN=CTSF PE=1 SV=1 - [CATF_HUMAN]	1.45	1	1	1	484	53.3318	8.22119	1.07892	1.00086	0.841433	0.973738	0.743204
O75015	Low affinity immunoglobulin gamma Fc region receptor III-B OS=Homo sapiens GN=FCGR3B PE=1 SV=2 - [FCG3B_HUMAN]	15.02	1	4	5	233	26.1992	6.7124	0.95846	0.950878	1.1721	1.02715	0.744091
P04180	Phosphatidylcholine-sterol acyltransferase OS=Homo sapiens GN=LCAT PE=1 SV=1 - [LCAT_HUMAN]	10.68	4	4	4	440	49.5461	6.11279	1.05647	1.10749	0.904039	1.02267	0.74631
P00915	Carbonic anhydrase 1 OS=Homo sapiens GN=CA1 PE=1 SV=2 - [CAH1_HUMAN]	23.75	6	6	14	261	28.8524	7.12256	0.873068	0.914665	1.39944	1.06239	0.747351
P62258	14-3-3 protein epsilon OS=Homo sapiens GN=YWHAE PE=1 SV=1 - [1433E_HUMAN]	8.63	1	2	2	255	29.1554	4.7417	0.951897	0.923276	1.07483	0.983334	0.75427
Q9Y5C1	Angiopoietin-related protein 3 OS=Homo sapiens GN=ANGPTL3 PE=1 SV=1 - [ANGL3_HUMAN]	4.78	2	2	3	460	53.6042	6.69775	1.04709	0.846733	1.03695	0.976924	0.757084
P04066	Tissue alpha-L-fucosidase OS=Homo sapiens GN=FUCA1 PE=1 SV=4 - [FUCO_HUMAN]	3.86	2	2	2	466	53.6547	6.84424	1.07503	0.866489	0.996487	0.979335	0.766352
P02787	Serotransferrin OS=Homo sapiens GN=TF PE=1 SV=3 - [TRFE_HUMAN]	8.17	4	4	4	698	77.0136	7.12256	0.911713	0.835926	1.44281	1.06348	0.771121
P02760	Protein AMBP OS=Homo sapiens GN=AMBP PE=1 SV=1 - [AMBP_HUMAN]	53.98	15	15	69	352	38.974	6.25244	0.942326	0.984576	1.0444	0.990434	0.777306
Q16853	Membrane primary amine oxidase OS=Homo sapiens GN=AOC3 PE=1 SV=3 - [AOC3_HUMAN]	8.52	5	5	5	763	84.5683	6.52197	0.999362	0.945995	1.09737	1.01424	0.77846
P04264	Keratin, type II cytoskeletal 1 OS=Homo sapiens GN=KRT1 PE=1 SV=6 - [K2C1_HUMAN]	24.07	13	14	19	644	65.999	8.11865	1.20817	0.949441	0.703298	0.953636	0.780554
P02671	Fibrinogen alpha chain OS=Homo sapiens GN=FGA PE=1 SV=2 - [FIBA_HUMAN]	13.86	10	10	21	866	94.9144	6.01123	0.993043	1.05307	0.916115	0.987409	0.780842
Q9UBP4	Dickkopf-related protein 3 OS=Homo sapiens GN=DKK3 PE=1 SV=2 - [DKK3_HUMAN]	6.57	1	1	1	350	38.3651	4.65283	0.966396	0.856429	1.10949	0.977438	0.787215
O00187	Mannan-binding lectin serine protease 2 OS=Homo sapiens GN=MASP2 PE=1 SV=4 - [MASP2_HUMAN]	11.95	6	6	9	686	75.6536	5.63037	1.03046	0.917717	1.01903	0.989069	0.789136
P14625	Endoplasmin OS=Homo sapiens GN=HSP90B1 PE=1 SV=1 - [ENPL_HUMAN]	9.46	7	7	8	803	92.4113	4.84326	1.01396	0.975624	1.00084	0.996808	0.803202
Q15582	Transforming growth factor-beta-induced protein ig-h3 OS=Homo sapiens GN=TGFBI PE=1 SV=1 - [BGH3_HUMAN]	14.64	10	10	13	683	74.634	7.7085	1.04366	0.962387	0.972749	0.992932	0.807897
P15151	Poliovirus receptor OS=Homo sapiens GN=PVR PE=1 SV=2 - [PVR_HUMAN]	6.71	3	3	4	417	45.2738	6.52197	1.07767	0.963204	0.987927	1.0096	0.80839
O75019	Leukocyte immunoglobulin-like receptor subfamily A member 1 OS=Homo sapiens GN=LILRA1 PE=2 SV=1 - [LIRA1_HUMAN]	2.66	1	2	2	489	53.241	7.84033	1.20422	0.956007	0.728144	0.96279	0.812018
P23381	Tryptophan--tRNA ligase, cytoplasmic OS=Homo sapiens GN=WARS PE=1 SV=2 - [SYWC_HUMAN]	3.4	1	1	1	471	53.1316	6.22705	0.895062	0.924663	1.26953	1.02975	0.827593
Q9Y5Y7	Lymphatic vessel endothelial hyaluronic acid receptor 1 OS=Homo sapiens GN=LYVE1 PE=1 SV=2 - [LYVE1_HUMAN]	8.07	3	3	8	322	35.191	8.27979	1.01967	1.10936	0.803657	0.977562	0.82772
P06703	Protein S100-A6 OS=Homo sapiens GN=S100A6 PE=1 SV=1 - [S10A6_HUMAN]	8.89	1	1	1	90	10.1733	5.47803	0.659172	0.66622	1.47496	0.933451	0.828773
P04075	Fructose-bisphosphate aldolase A OS=Homo sapiens GN=ALDOA PE=1 SV=2 - [ALDOA_HUMAN]	17.03	5	5	6	364	39.3953	8.08936	0.926838	0.927257	1.10324	0.985778	0.831225
Q08380	Galectin-3-binding protein OS=Homo sapiens GN=LGALS3BP PE=1 SV=1 - [LG3BP_HUMAN]	15.9	8	8	13	585	65.2893	5.2749	1.04223	0.951838	1.02596	1.00668	0.832715
P05019	Insulin-like growth factor I OS=Homo sapiens GN=IGF1 PE=1 SV=1 - [IGF1_HUMAN]	6.67	1	1	1	195	21.8269	9.71533	1.02252	1.03432	0.916924	0.991255	0.836522
Q8IYB3	Serine/arginine repetitive matrix protein 1 OS=Homo sapiens GN=SRRM1 PE=1 SV=2 - [SRRM1_HUMAN]	1.22	1	1	1	904	102.274	11.8394	1.02432	1.25814	0.80784	1.0301	0.838462
Q9UNW1	Multiple inositol polyphosphate phosphatase 1 OS=Homo sapiens GN=MINPP1 PE=1 SV=1 - [MINP1_HUMAN]	23.82	10	10	13	487	55.0161	7.81104	1.0098	1.06696	0.946124	1.00763	0.847266
A5D6W6	Fat storage-inducing transmembrane protein 1 OS=Homo sapiens GN=FITM1 PE=2 SV=1 - [FITM1_HUMAN]	3.42	1	1	1	292	32.1861	9.78857	0.978959	1.27018	0.833415	1.02752	0.850173
Q14314	Fibroleukin OS=Homo sapiens GN=FGL2 PE=1 SV=1 - [FGL2_HUMAN]	1.37	1	1	1	439	50.1968	7.38623	0.952932	0.958109	1.06585	0.992297	0.853642
P46379	Large proline-rich protein BAG6 OS=Homo sapiens GN=BAG6 PE=1 SV=2 - [BAG6_HUMAN]	1.5	1	1	1	1132	119.334	5.60498	1.14411	0.915474	0.982174	1.01392	0.856508
Q16610	Extracellular matrix protein 1 OS=Homo sapiens GN=ECM1 PE=1 SV=2 - [ECM1_HUMAN]	38.89	16	16	34	540	60.6353	6.7124	1.05521	1.05635	0.845619	0.985726	0.857398
Q13103	Secreted phosphoprotein 24 OS=Homo sapiens GN=SPP2 PE=1 SV=1 - [SPP24_HUMAN]	11.85	2	2	3	211	24.3218	8.32373	1.17269	0.85191	0.918665	0.981088	0.864417
P35442	Thrombospondin-2 OS=Homo sapiens GN=THBS2 PE=1 SV=2 - [TSP2_HUMAN]	2.56	2	2	3	1172	129.908	4.83057	0.980191	0.974714	1.03411	0.996338	0.864688
P61769	Beta-2-microglobulin OS=Homo sapiens GN=B2M PE=1 SV=1 - [B2MG_HUMAN]	16.81	2	2	2	119	13.7059	6.52197	1.06548	1.01462	0.891322	0.990474	0.87081
Q2V2M9	FH1/FH2 domain-containing protein 3 OS=Homo sapiens GN=FHOD3 PE=1 SV=2 - [FHOD3_HUMAN]	0.7	1	1	1	1422	158.516	5.98584	0.817759	1.25032	0.997198	1.02176	0.878289
Q86YZ3	Hornerin OS=Homo sapiens GN=HRNR PE=1 SV=2 - [HORN_HUMAN]	1.93	1	1	1	2850	282.228	10.0376	1.18151	1.17658	0.532467	0.963519	0.881169
Q14118	Dystroglycan OS=Homo sapiens GN=DAG1 PE=1 SV=2 - [DAG1_HUMAN]	4.02	2	2	2	895	97.3807	8.55811	0.857868	0.801667	1.26683	0.975455	0.882428
P07237	Protein disulfide-isomerase OS=Homo sapiens GN=P4HB PE=1 SV=3 - [PDIA1_HUMAN]	8.07	4	4	4	508	57.0807	4.86865	0.957747	1.05501	0.973004	0.995254	0.889541
P16930	Fumarylacetoacetase OS=Homo sapiens GN=FAH PE=1 SV=2 - [FAAA_HUMAN]	5.01	2	2	2	419	46.3442	6.94678	1.01627	0.917813	1.08777	1.00728	0.896047
P80723	Brain acid soluble protein 1 OS=Homo sapiens GN=BASP1 PE=1 SV=2 - [BASP1_HUMAN]	21.59	3	3	3	227	22.68	4.62744	0.912783	0.808369	1.22721	0.982787	0.903761
P09871	Complement C1s subcomponent OS=Homo sapiens GN=C1S PE=1 SV=1 - [C1S_HUMAN]	37.21	21	22	87	688	76.6348	4.95752	1.01078	0.964874	1.03212	1.00259	0.908058
Q86VB7	Scavenger receptor cysteine-rich type 1 protein M130 OS=Homo sapiens GN=CD163 PE=1 SV=2 - [C163A_HUMAN]	5.8	6	6	8	1156	125.369	5.94775	1.12793	0.887108	1.01179	1.00894	0.909421
P80748	Ig lambda chain V-III region LOI OS=Homo sapiens PE=1 SV=1 - [LV302_HUMAN]	7.21	1	1	1	111	11.9278	5.08447	0.95266	0.955711	1.11111	1.00649	0.912544
Q9HCN6	Platelet glycoprotein VI OS=Homo sapiens GN=GP6 PE=1 SV=4 - [GPVI_HUMAN]	2.95	1	1	1	339	36.8429	9.20264	0.891464	1.13151	0.951979	0.991651	0.91838
P05160	Coagulation factor XIII B chain OS=Homo sapiens GN=F13B PE=1 SV=3 - [F13B_HUMAN]	32.98	17	17	39	661	75.4612	6.39209	0.970151	1.03906	0.995896	1.0017	0.940269
Q9H8L6	Multimerin-2 OS=Homo sapiens GN=MMRN2 PE=1 SV=2 - [MMRN2_HUMAN]	3.69	3	3	3	949	104.344	5.85889	0.898907	0.949506	1.17024	1.00622	0.947283
P02788	Lactotransferrin OS=Homo sapiens GN=LTF PE=1 SV=6 - [TRFL_HUMAN]	33.38	18	18	23	710	78.1319	8.11865	0.888065	1.03533	1.06443	0.995942	0.947483
P01034	Cystatin-C OS=Homo sapiens GN=CST3 PE=1 SV=1 - [CYTC_HUMAN]	11.64	2	2	4	146	15.7891	8.74854	0.98523	0.780804	1.21009	0.992041	0.954661
Q6UY14	ADAMTS-like protein 4 OS=Homo sapiens GN=ADAMTSL4 PE=1 SV=2 - [ATL4_HUMAN]	2.33	2	2	2	1074	116.471	8.33838	0.917388	0.868256	1.19605	0.993898	0.957756
P32004	Neural cell adhesion molecule L1 OS=Homo sapiens GN=L1CAM PE=1 SV=2 - [L1CAM_HUMAN]	1.19	1	1	1	1257	139.915	6.23975	1.32099	0.620435	1.087	1.00948	0.967479
P62937	Peptidyl-prolyl cis-trans isomerase A OS=Homo sapiens GN=PPIA PE=1 SV=2 - [PPIA_HUMAN]	15.15	3	3	4	165	18.0009	7.81104	0.790357	1.02615	1.19987	1.00546	0.967491
P04040	Catalase OS=Homo sapiens GN=CAT PE=1 SV=3 - [CATA_HUMAN]	17.46	8	8	9	527	59.7188	7.38623	0.918157	0.818592	1.2826	1.00645	0.96768
P07195	L-lactate dehydrogenase B chain OS=Homo sapiens GN=LDHB PE=1 SV=2 - [LDHB_HUMAN]	25.15	6	7	12	334	36.6151	6.04932	0.99613	0.957443	1.04342	0.998998	0.971532
P05062	Fructose-bisphosphate aldolase B OS=Homo sapiens GN=ALDOB PE=1 SV=2 - [ALDOB_HUMAN]	17.58	5	5	7	364	39.4481	7.86963	1.15182	0.8618	0.996196	1.00327	0.972412
P55103	Inhibin beta C chain OS=Homo sapiens GN=INHBC PE=2 SV=1 - [INHBC_HUMAN]	7.67	2	2	3	352	38.2134	7.10791	0.998653	1.03113	0.971615	1.00047	0.980809
P08174	Complement decay-accelerating factor OS=Homo sapiens GN=CD55 PE=1 SV=4 - [DAF_HUMAN]	2.1	1	1	1	381	41.3736	7.59131	0.991078	0.994493	1.01477	1.00011	0.989102
P12111	Collagen alpha-3(VI) chain OS=Homo sapiens GN=COL6A3 PE=1 SV=5 - [CO6A3_HUMAN]	6.42	16	16	22	3177	343.457	6.68311	1.02884	1.00132	0.970563	1.00024	0.989861
P30043	Flavin reductase (NADPH) OS=Homo sapiens GN=BLVRB PE=1 SV=3 - [BLVRB_HUMAN]	18.45	3	3	3	206	22.1054	7.6499	0.832313	0.882676	1.28948	1.00149	0.992718
O14791	Apolipoprotein L1 OS=Homo sapiens GN=APOL1 PE=1 SV=5 - [APOL1_HUMAN]	11.81	5	5	6	398	43.9469	5.80811	1.09804	0.992277	0.911036	1.00045	0.994115
P02745	Complement C1q subcomponent subunit A OS=Homo sapiens GN=C1QA PE=1 SV=2 - [C1QA_HUMAN]	8.57	2	2	7	245	26.0002	9.11475	0.961033	0.96581	1.0737	1.00018	0.996529
