# Supplementary material for: Proteomic Analysis Reveals sympathetic system and immune-inflammation biomarkers in serum of drug-free obsessive-compulsive disorder
Source: Research Square preprint supplement (doi:10.21203/rs.3.rs-1650133/v1), 2022-05-25
Supplement: Supplementary file 7 [file 84b8b890c0ed17ac10af66b5.xlsx]

## Sheet: Sheet1
Supplementary Table 5. Parameters of protein-protein network
#node1	node2	node1_string_id	node2_string_id	neighborhood_on_chromosome	gene_fusion	phylogenetic_cooccurrence	homology	coexpression	experimentally_determined_interaction	database_annotated	automated_textmining	combined_score
A2M	IGFBP1	9606.ENSP00000323929	9606.ENSP00000275525	0	0	0	0	0.096	0	0	0.806	0.817
A2M	IGF1	9606.ENSP00000323929	9606.ENSP00000302665	0	0	0	0	0.062	0	0	0.463	0.474
A2M	APOD	9606.ENSP00000323929	9606.ENSP00000345179	0	0	0	0	0.125	0.282	0	0.435	0.614
AMBN	IGJ	9606.ENSP00000313809	9606.ENSP00000254801	0	0	0	0	0.062	0	0	0.633	0.641
ANG	GRN	9606.ENSP00000336762	9606.ENSP00000053867	0	0	0	0	0.076	0	0	0.38	0.402
ANG	HGF	9606.ENSP00000336762	9606.ENSP00000222390	0	0	0	0	0.062	0	0	0.556	0.565
ANG	KDR	9606.ENSP00000336762	9606.ENSP00000263923	0	0	0	0	0	0	0	0.492	0.492
ANG	IGFBP1	9606.ENSP00000336762	9606.ENSP00000275525	0	0	0	0	0.088	0	0	0.391	0.42
ANG	IGF1	9606.ENSP00000336762	9606.ENSP00000302665	0	0	0	0	0.062	0	0	0.46	0.471
ANG	RNASE4	9606.ENSP00000336762	9606.ENSP00000452245	0	0	0	0.861	0.838	0	0	0.365	0.846
APOC4	APOD	9606.ENSP00000468236	9606.ENSP00000345179	0	0	0	0	0	0	0	0.556	0.556
APOD	A2M	9606.ENSP00000345179	9606.ENSP00000323929	0	0	0	0	0.125	0.282	0	0.435	0.614
APOD	APOC4	9606.ENSP00000345179	9606.ENSP00000468236	0	0	0	0	0	0	0	0.556	0.556
CBL	HGF	9606.ENSP00000264033	9606.ENSP00000222390	0	0	0	0	0	0	0.9	0.403	0.937
CBL	CDH1	9606.ENSP00000264033	9606.ENSP00000261769	0	0	0	0	0	0.097	0.36	0.408	0.628
CBL	KDR	9606.ENSP00000264033	9606.ENSP00000263923	0	0	0	0	0	0.725	0.9	0.452	0.983
CBL	MET	9606.ENSP00000264033	9606.ENSP00000317272	0	0	0	0	0	0.909	0.9	0.904	0.999
CDH1	HGF	9606.ENSP00000261769	9606.ENSP00000222390	0	0	0	0	0	0	0.9	0.689	0.967
CDH1	PKM	9606.ENSP00000261769	9606.ENSP00000320171	0	0	0	0	0	0.097	0	0.486	0.516
CDH1	CBL	9606.ENSP00000261769	9606.ENSP00000264033	0	0	0	0	0	0.097	0.36	0.408	0.628
CDH1	CDH5	9606.ENSP00000261769	9606.ENSP00000344115	0	0	0	0.739	0	0	0.54	0.782	0.632
CDH1	KDR	9606.ENSP00000261769	9606.ENSP00000263923	0	0	0	0	0	0	0	0.644	0.644
CDH1	IGF1	9606.ENSP00000261769	9606.ENSP00000302665	0	0	0	0	0	0	0.9	0.561	0.954
CDH1	MET	9606.ENSP00000261769	9606.ENSP00000317272	0	0	0	0	0.062	0.282	0.9	0.987	0.999
CDH5	HGF	9606.ENSP00000344115	9606.ENSP00000222390	0	0	0	0	0	0	0	0.47	0.47
CDH5	CDH1	9606.ENSP00000344115	9606.ENSP00000261769	0	0	0	0.739	0	0	0.54	0.782	0.632
CDH5	KDR	9606.ENSP00000344115	9606.ENSP00000263923	0	0	0	0	0.231	0.869	0.9	0.99	0.999
CDH5	IGF1	9606.ENSP00000344115	9606.ENSP00000302665	0	0	0	0	0.062	0	0	0.45	0.462
ENPEP	GRN	9606.ENSP00000265162	9606.ENSP00000053867	0	0	0	0	0	0	0	0.502	0.502
GRN	ANG	9606.ENSP00000053867	9606.ENSP00000336762	0	0	0	0	0.076	0	0	0.38	0.402
GRN	HGF	9606.ENSP00000053867	9606.ENSP00000222390	0	0	0	0	0	0	0	0.422	0.422
GRN	ENPEP	9606.ENSP00000053867	9606.ENSP00000265162	0	0	0	0	0	0	0	0.502	0.502
HGF	GRN	9606.ENSP00000222390	9606.ENSP00000053867	0	0	0	0	0	0	0	0.422	0.422
HGF	CDH5	9606.ENSP00000222390	9606.ENSP00000344115	0	0	0	0	0	0	0	0.47	0.47
HGF	ANG	9606.ENSP00000222390	9606.ENSP00000336762	0	0	0	0	0.062	0	0	0.556	0.565
HGF	IGF1	9606.ENSP00000222390	9606.ENSP00000302665	0	0	0	0	0.062	0	0	0.799	0.804
HGF	KDR	9606.ENSP00000222390	9606.ENSP00000263923	0	0	0	0	0.062	0	0.6	0.693	0.875
HGF	CBL	9606.ENSP00000222390	9606.ENSP00000264033	0	0	0	0	0	0	0.9	0.403	0.937
HGF	CDH1	9606.ENSP00000222390	9606.ENSP00000261769	0	0	0	0	0	0	0.9	0.689	0.967
HGF	MET	9606.ENSP00000222390	9606.ENSP00000317272	0	0	0	0	0.062	0.98	0.9	0.991	0.999
IGF1	HGF	9606.ENSP00000302665	9606.ENSP00000222390	0	0	0	0	0.062	0	0	0.799	0.804
IGF1	CDH1	9606.ENSP00000302665	9606.ENSP00000261769	0	0	0	0	0	0	0.9	0.561	0.954
IGF1	KDR	9606.ENSP00000302665	9606.ENSP00000263923	0	0	0	0	0.062	0	0.6	0.627	0.848
IGF1	IGFBP4	9606.ENSP00000302665	9606.ENSP00000269593	0	0	0	0	0.085	0.973	0.6	0.989	0.999
IGF1	IGFBP1	9606.ENSP00000302665	9606.ENSP00000275525	0	0	0	0	0.062	0.959	0.6	0.991	0.999
IGF1	CDH5	9606.ENSP00000302665	9606.ENSP00000344115	0	0	0	0	0.062	0	0	0.45	0.462
IGF1	ANG	9606.ENSP00000302665	9606.ENSP00000336762	0	0	0	0	0.062	0	0	0.46	0.471
IGF1	A2M	9606.ENSP00000302665	9606.ENSP00000323929	0	0	0	0	0.062	0	0	0.463	0.474
IGF1	MET	9606.ENSP00000302665	9606.ENSP00000317272	0	0	0	0	0.062	0	0.6	0.566	0.823
IGFBP1	IGFBP4	9606.ENSP00000275525	9606.ENSP00000269593	0	0	0	0.813	0.098	0.927	0	0.854	0.942
IGFBP1	ANG	9606.ENSP00000275525	9606.ENSP00000336762	0	0	0	0	0.088	0	0	0.391	0.42
IGFBP1	A2M	9606.ENSP00000275525	9606.ENSP00000323929	0	0	0	0	0.096	0	0	0.806	0.817
IGFBP1	IGF1	9606.ENSP00000275525	9606.ENSP00000302665	0	0	0	0	0.062	0.959	0.6	0.991	0.999
IGFBP4	IGFBP1	9606.ENSP00000269593	9606.ENSP00000275525	0	0	0	0.813	0.098	0.927	0	0.854	0.942
IGFBP4	IGF1	9606.ENSP00000269593	9606.ENSP00000302665	0	0	0	0	0.085	0.973	0.6	0.989	0.999
IGJ	AMBN	9606.ENSP00000254801	9606.ENSP00000313809	0	0	0	0	0.062	0	0	0.633	0.641
KDR	HGF	9606.ENSP00000263923	9606.ENSP00000222390	0	0	0	0	0.062	0	0.6	0.693	0.875
KDR	CDH1	9606.ENSP00000263923	9606.ENSP00000261769	0	0	0	0	0	0	0	0.644	0.644
KDR	ANG	9606.ENSP00000263923	9606.ENSP00000336762	0	0	0	0	0	0	0	0.492	0.492
KDR	MET	9606.ENSP00000263923	9606.ENSP00000317272	0	0	0	0.564	0	0.495	0	0.944	0.702
KDR	IGF1	9606.ENSP00000263923	9606.ENSP00000302665	0	0	0	0	0.062	0	0.6	0.627	0.848
KDR	CBL	9606.ENSP00000263923	9606.ENSP00000264033	0	0	0	0	0	0.725	0.9	0.452	0.983
KDR	CDH5	9606.ENSP00000263923	9606.ENSP00000344115	0	0	0	0	0.231	0.869	0.9	0.99	0.999
MET	HGF	9606.ENSP00000317272	9606.ENSP00000222390	0	0	0	0	0.062	0.98	0.9	0.991	0.999
MET	CDH1	9606.ENSP00000317272	9606.ENSP00000261769	0	0	0	0	0.062	0.282	0.9	0.987	0.999
MET	KDR	9606.ENSP00000317272	9606.ENSP00000263923	0	0	0	0.564	0	0.495	0	0.944	0.702
MET	CBL	9606.ENSP00000317272	9606.ENSP00000264033	0	0	0	0	0	0.909	0.9	0.904	0.999
MET	IGF1	9606.ENSP00000317272	9606.ENSP00000302665	0	0	0	0	0.062	0	0.6	0.566	0.823
PKM	CDH1	9606.ENSP00000320171	9606.ENSP00000261769	0	0	0	0	0	0.097	0	0.486	0.516
PKM	TKT	9606.ENSP00000320171	9606.ENSP00000391481	0.135	0	0	0	0.172	0.271	0.8	0.679	0.96
RNASE4	ANG	9606.ENSP00000452245	9606.ENSP00000336762	0	0	0	0.861	0.838	0	0	0.365	0.846
TKT	PKM	9606.ENSP00000391481	9606.ENSP00000320171	0.135	0	0	0	0.172	0.271	0.8	0.679	0.96
